# Supplementary material
Source: PubMed Central journal article supplement (PMC7011753)
Supplement: cm9b02825_si_001.pdf [file cm9b02825_si_001.pdf]

# **Structurally Diverse Covalent Triazine-based Framework Materials for Photocatalytic Hydrogen Evolution from Water**

Christian B. Meier,<sup>‡</sup> Rob Clowes,<sup>‡</sup> Enrico Berardo,<sup>Δ</sup> Kim E. Jelfs,<sup>Δ</sup> Martijn A. Zwijnenburg,<sup>\*||</sup> Reiner Sebastian Sprick,<sup>\*‡</sup> and Andrew I. Cooper<sup>\*‡</sup>

*<sup>‡</sup>Department of Chemistry and Materials Innovation Factory, 51 Oxford Street, Liverpool L7 3NY, U.K.*

*<sup>||</sup>Department of Chemistry, University College London, 20 Gordon Street, London WC1H 0AJ, U.K.*

*<sup>Δ</sup>Department of Chemistry, Molecular Sciences Research Hub, Imperial College London, White City Campus, Wood Lane, London, W12 0BZ, U.K.*

## 1. Experimental methods

All reagents were obtained from Sigma-Aldrich, Fluorochem, TCI, Alfa Aesar or Howin Consultancy Limited (P. R. China) and used as received, except for 2,4,6-tris-[4-(4,4,5,5-tetramethyl-1,3,2-dioxaborolan-2-yl)phenyl]-1,3,5-triazine,<sup>1</sup> 3,7-dibromo dibenzo[*b,d*]thiophene-*S,S*-dioxide,<sup>2</sup> and CTF-2/CTF-3 Suzuki<sup>1</sup> which were synthesized based on literature procedures. Nicanite was purchased from Carbodeon Ltd Oy (Finland).

**Analytical methods:** UV-Visible absorption spectra of the polymers were recorded on a Shimadzu UV-2550 UV-Vis spectrometer as powders in the solid state. The fluorescence spectra of the polymer powders were measured with a Shimadzu RF-5301PC fluorescence spectrometer at room temperature. Transmission FT-IR spectra were recorded on a Bruker Tensor 27 at room temperature; samples were prepared as KBr pellets. Thermogravimetric analysis was performed on a TA instruments Q5000IR analyzer by heating samples at 10 °C min<sup>-1</sup> in air in open aluminium pans from room temperature to 600 °C and holding at 600 °C for 30 minutes. CHN Analysis was performed on a Thermo EA1112 Flash CHNS-O Analyzer using standard microanalytical procedures. The porosity to nitrogen was tested on Micromeritics 2420 instruments at a temperature of 77 K. Light obscuration were tested by average transmission on a Turbiscan AGS with a NIR light source ( $\lambda = 880$  nm). Palladium content was determined by ICP-OES by Exeter Analytical Service (Coventry, United Kingdom). Water contact angles were measured using pressed pellets and a drop-shape analysis apparatus (Krüss DSA100). The contact angles were analyzed by the Young-Laplace fitting method. TCSPC experiments were performed on an Edinburgh Instruments LS980-D2S2-STM spectrometer equipped with picosecond pulsed LED excitation sources and a R928 detector, with a stop count rate below 3%. Pulsed diode lasers were used to excite the polymers in the solid state with optical pulses between 50-200 ps FWHM (EPL-375 diode -  $\lambda = 370.5$  nm, EPL-445 -  $\lambda = 441.2$  nm, EPL-475 -  $\lambda = 472.8$  nm) The instrument response function was measured with colloidal silica (LUDOX<sup>®</sup> HS-40, Sigma-Aldrich) at the excitation wavelength without filter. Decay times were fitted in the FAST software using three decay exponents.

## 2. Polymer synthesis

**CTF-5:** 2,4,6-Tris[4-(4,4,5,5-tetramethyl-1,3,2-dioxaborolan-2-yl)phenyl]-1,3,5-triazine (500 mg, 728  $\mu$ mol), 1,3-dibromobenzene (257 mg, 1.09 mmol), *N,N*-dimethylformamide (10.9 mL), aqueous K<sub>2</sub>CO<sub>3</sub> (2.0 M, 2.18 mL) and [Pd(PPh<sub>3</sub>)<sub>4</sub>] (10.1 mg, 1.2 mol %) were used in the polymerization. After work-up, the product was obtained as a grey powder in 92% yield (283 mg). CHN analysis calc. for (C<sub>20</sub>H<sub>12</sub>N<sub>2</sub>)<sub>n</sub>: C, 85.69; H, 4.31; N, 9.99%, found: C, 78.75; H, 4.24; N 8.22%.

**CTF-6:** 2,4,6-Tris[4-(4,4,5,5-tetramethyl-1,3,2-dioxaborolan-2-yl)phenyl]-1,3,5-triazine (500 mg, 728  $\mu$ mol), 2,4-dibromo-1,1'-biphenyl (340 mg, 1.09 mmol), *N,N*-dimethylformamide (10.9 mL), aqueous  $K_2CO_3$  (2.0 M, 2.18 mL) and  $[Pd(PPh_3)_4]$  (10.1 mg, 1.2 mol %) were used in the polymerisation. After work-up, the product was obtained as a brown solid in 96% yield (376 mg). CHN analysis calc. for  $(C_{26}H_{16}N_2)_n$ : C, 87.62; H, 4.52; N, 7.86%, found: C, 78.37; H, 4.30; N 6.59%.

**CTF-7:** 2,4,6-Tris[4-(4,4,5,5-tetramethyl-1,3,2-dioxaborolan-2-yl)phenyl]-1,3,5-triazine (500 mg, 728  $\mu$ mol), 3,5-dibromo-1,1'-biphenyl (340 mg, 1.09 mmol), *N,N*-dimethylformamide (10.9 mL), aqueous  $K_2CO_3$  (2.0 M, 2.18 mL) and  $[Pd(PPh_3)_4]$  (10.1 mg, 1.2 mol %) were used in the polymerisation. After work-up, the product was obtained as a grey powder in 97% yield (381 mg). CHN analysis calc. for  $(C_{26}H_{16}N_2)_n$ : C, 87.62; H, 4.52; N, 7.86%, found: C, 74.53; H, 4.23; N 6.11%.

**CTF-8:** 2,4,6-Tris[4-(4,4,5,5-tetramethyl-1,3,2-dioxaborolan-2-yl)phenyl]-1,3,5-triazine (500 mg, 728  $\mu$ mol), 2,7-dibromotriphenylene (421 mg, 1.09 mmol), *N,N*-dimethylformamide (10.9 mL), aqueous  $K_2CO_3$  (2.0 M, 2.18 mL) and  $[Pd(PPh_3)_4]$  (10.1 mg, 1.2 mol %) were used in the polymerisation. After work-up, the product was obtained as a pale green powder in 99% yield (468 mg). CHN analysis calc. for  $(C_{32}H_{18}N_2)_n$ : C, 89.28; H, 4.21; N, 6.51%, found: C, 64.52; H, 3.40; N 4.43%.

**CTF-9:** 2,4,6-Tris[4-(4,4,5,5-tetramethyl-1,3,2-dioxaborolan-2-yl)phenyl]-1,3,5-triazine (500 mg, 728  $\mu$ mol), 9,10-dibromoanthracene (367 mg, 1.09 mmol), *N,N*-dimethylformamide (10.9 mL), aqueous  $K_2CO_3$  (2.0 M, 2.18 mL) and  $[Pd(PPh_3)_4]$  (10.1 mg, 1.2 mol %) were used in the polymerisation. After work-up, the product was obtained as a bright yellow powder in 85% yield (356 mg). CHN analysis calc. for  $(C_{28}H_{16}N_2)_n$ : C, 88.40; H, 4.24; N, 7.36%, found: C, 82.15; H, 4.16; N 6.74%.

**CTF-10:** 2,4,6-Tris[4-(4,4,5,5-tetramethyl-1,3,2-dioxaborolan-2-yl)phenyl]-1,3,5-triazine (500 mg, 728  $\mu$ mol), 2,5-dibromofuran (246 mg, 1.09 mmol), *N,N*-dimethylformamide (10.9 mL), aqueous  $K_2CO_3$  (2.0 M, 2.18 mL) and  $[Pd(PPh_3)_4]$  (10.1 mg, 1.2 mol %) were used in the polymerisation. After work-up, the product was obtained as a bright yellow powder in 79% yield (234 mg). CHN analysis calc. for  $(C_{18}H_{10}N_2O)_n$ : C, 79.99; H, 3.73; N, 10.36%, found: C, 75.75; H, 3.79; N 9.48%.

**CTF-11:** 2,4,6-Tris[4-(4,4,5,5-tetramethyl-1,3,2-dioxaborolan-2-yl)phenyl]-1,3,5-triazine (500 mg, 728  $\mu$ mol), 2,5-dibromothiophene (264 mg, 1.09 mmol), *N,N*-dimethylformamide (10.9 mL), aqueous  $K_2CO_3$  (2.0 M, 2.18 mL) and  $[Pd(PPh_3)_4]$  (10.1 mg, 1.2 mol %) were used in the polymerisation. After work-up, the product was obtained as an orange powder in 95% yield (297 mg). CHN analysis calc. for  $(C_{18}H_{10}N_2S)_n$ : C, 75.50; H, 3.52; N, 9.87%, found: C, 68.07; H, 3.69; N 8.10%.

**CTF-12:** 2,4,6-Tris[4-(4,4,5,5-tetramethyl-1,3,2-dioxaborolan-2-yl)phenyl]-1,3,5-triazine (500 mg, 728  $\mu$ mol), 2,5-dibromoselenophene (315 mg, 1.09 mmol), *N,N*-dimethylformamide (10.9 mL),

aqueous  $K_2CO_3$  (2.0 M, 2.18 mL) and  $[Pd(PPh_3)_4]$  (10.1 mg, 1.2 mol %) were used in the polymerisation. After work-up, the product was obtained as a yellow powder in 75% yield (276 mg). CHN analysis calc. for  $(C_{18}H_{10}N_2Se)_n$ : C, 64.88; H, 3.02; N, 8.41%, found: C, 62.72; H, 3.17; N 8.48%.

**CTF-13:** 2,4,6-Tris[4-(4,4,5,5-tetramethyl-1,3,2-dioxaborolan-2-yl)phenyl]-1,3,5-triazine (500 mg, 728  $\mu$ mol), 2,5-dibromothiazole (265 mg, 1.09 mmol), *N,N*-dimethylformamide (10.9 mL), aqueous  $K_2CO_3$  (2.0 M, 2.18 mL) and  $[Pd(PPh_3)_4]$  (10.1 mg, 1.2 mol %) were used in the polymerisation. After work-up, the product was obtained as a grey powder in 37% yield (118 mg). CHN analysis calc. for  $(C_{17}H_9N_3S)_n$ : C, 71.06; H, 3.16; N, 14.62%, found: C, 73.18; H, 4.20; N 12.10%.

**CTF-14:** 2,4,6-Tris[4-(4,4,5,5-tetramethyl-1,3,2-dioxaborolan-2-yl)phenyl]-1,3,5-triazine (500 mg, 728  $\mu$ mol), 2,5-dibromothiophene dioxide (299 mg, 1.09 mmol), *N,N*-dimethylformamide (10.9 mL), aqueous  $K_2CO_3$  (2.0 M, 2.18 mL) and  $[Pd(PPh_3)_4]$  (10.1 mg, 1.2 mol %) were used in the polymerisation. After work-up, the product was obtained as a brown powder in 51% yield (177 mg). CHN analysis calc. for  $(C_{18}H_{10}N_2S)_n$ : C, 75.50; H, 3.52; N, 9.78%, found: C, 67.91; H, 3.87; N 6.4%.

**CTF-15:** 2,4,6-Tris[4-(4,4,5,5-tetramethyl-1,3,2-dioxaborolan-2-yl)phenyl]-1,3,5-triazine (500 mg, 728  $\mu$ mol), 2,5-dibromobenzonitrile (285 mg, 1.09 mmol), *N,N*-dimethylformamide (10.9 mL), aqueous  $K_2CO_3$  (2.0 M, 2.18 mL) and  $[Pd(PPh_3)_4]$  (10.1 mg, 1.2 mol %) were used in the polymerisation. After work-up, the product was obtained as a pale brown powder in 82% yield (309 mg). CHN analysis calc. for  $(C_{21}H_{11}N_3)_n$ : C, 82.61; H, 3.63; N, 13.76%, found: C, 75.36; H, 3.58; N 12.23%.

**CTF-16:** 2,4,6-Tris[4-(4,4,5,5-tetramethyl-1,3,2-dioxaborolan-2-yl)phenyl]-1,3,5-triazine (500 mg, 728  $\mu$ mol), 2,5-dibromo-1,4-benzenedicarbonitrile (312 mg, 1.09 mmol), *N,N*-dimethylformamide (10.9 mL), aqueous  $K_2CO_3$  (2.0 M, 2.18 mL) and  $[Pd(PPh_3)_4]$  (10.1 mg, 1.2 mol %) were used in the polymerisation. After work-up, the product was obtained as a dark yellow powder in 98% yield (355 mg). CHN analysis calc. for  $(C_{22}H_{10}N_4)_n$ : C, 79.99; H, 3.05; N, 16.96%, found: C, 70.42; H, 3.79; N 14.14%.

**CTF-17:** 2,4,6-Tris[4-(4,4,5,5-tetramethyl-1,3,2-dioxaborolan-2-yl)phenyl]-1,3,5-triazine (500 mg, 728  $\mu$ mol), 2,5-dibromoaniline (274 mg, 1.09 mmol), *N,N*-dimethylformamide (10.9 mL), aqueous  $K_2CO_3$  (2.0 M, 2.18 mL) and  $[Pd(PPh_3)_4]$  (10.1 mg, 1.2 mol %) were used in the polymerisation. After work-up, the product was obtained as a yellow powder in 94% yield (305 mg). CHN analysis calc. for  $(C_{20}H_{13}N_3)_n$ : C, 81.34; H, 4.44; N, 14.23%, found: C, 72.90; H, 4.24; N 11.51%.

**CTF-18:** 2,4,6-Tris[4-(4,4,5,5-tetramethyl-1,3,2-dioxaborolan-2-yl)phenyl]-1,3,5-triazine (500 mg, 728  $\mu$ mol), 1,4-dibromo-2-nitrobenzene (307 mg, 1.09 mmol), *N,N*-dimethylformamide (10.9 mL), aqueous  $K_2CO_3$  (2.0 M, 2.18 mL) and  $[Pd(PPh_3)_4]$  (10.1 mg, 1.2 mol %) were used in the polymerisation.

After work-up, the product was obtained as a grey powder in 76% yield (270 mg). CHN analysis calc. for  $(C_{20}H_{15}N_3O_2)_n$ : C, 73.84; H, 3.41; N, 12.92%, found: C, 42.49; H, 2.65; N 6.20%.

**CTF-19:** 2,4,6-Tris[4-(4,4,5,5-tetramethyl-1,3,2-dioxaborolan-2-yl)phenyl]-1,3,5-triazine (1.00 g, 1.46 mmol), 1,4-dibromotetrafluorobenzene (672 mg, 2.18 mmol), *N,N*-dimethylformamide (21.8 mL), aqueous  $K_2CO_3$  (2.0 M, 4.36 mL) and  $[Pd(PPh_3)_4]$  (20.2 mg, 1.2 mol %) were used in the polymerisation. After work-up, the product was obtained as a grey powder in 67% yield (521 mg). CHN analysis calc. for  $(C_{20}H_8F_4N_2)_n$ : C, 68.19; H, 2.29; N, 7.95%, found: C, 45.79; H, 2.13; N 5.19%.

**CTF-20:** 2,4,6-Tris[4-(4,4,5,5-tetramethyl-1,3,2-dioxaborolan-2-yl)phenyl]-1,3,5-triazine (500 mg, 728  $\mu$ mol), 1,4-dibromo-2,5-difluorobenzene (297 mg, 1.09 mmol), *N,N*-dimethylformamide (10.9 mL), aqueous  $K_2CO_3$  (2.0 M, 2.18 mL) and  $[Pd(PPh_3)_4]$  (10.1 mg, 1.2 mol %) were used in the polymerisation. After work-up, the product was obtained as a grey powder in 94% yield (325 mg). CHN analysis calc. for  $(C_{20}H_{10}F_2N_2)_n$ : C, 75.94; H, 3.19; N, 12.01%, found: C, 66.32; H, 3.22; N 6.99%.

**CTF-21:** 2,4,6-Tris[4-(4,4,5,5-tetramethyl-1,3,2-dioxaborolan-2-yl)phenyl]-1,3,5-triazine (1.00 g, 1.46 mmol), 1,4-dibromo-2,3-difluorobenzene (593 mg, 2.18 mmol), *N,N*-dimethylformamide (21.8 mL), aqueous  $K_2CO_3$  (2.0 M, 4.36 mL) and  $[Pd(PPh_3)_4]$  (20.2 mg, 1.2 mol %) were used in the polymerisation. After work-up, the product was obtained as a grey powder in 70% yield (353 mg). CHN analysis calc. for  $(C_{20}H_{10}F_2N_2)_n$ : C, 75.94; H, 3.19; N, 8.86%, found: C, 65.09; H, 2.96; N 6.78%.

**CTF-22:** 2,4,6-Tris[4-(4,4,5,5-tetramethyl-1,3,2-dioxaborolan-2-yl)phenyl]-1,3,5-triazine (500 mg, 728  $\mu$ mol), 1,4-dibromo-2-fluorobenzene (277 mg, 1.09 mmol), *N,N*-dimethylformamide (10.9 mL), aqueous  $K_2CO_3$  (2.0 M, 2.18 mL) and  $[Pd(PPh_3)_4]$  (10.1 mg, 1.2 mol %) were used in the polymerisation. After work-up, the product was obtained as a grey powder in 86% yield (283 mg). CHN analysis calc. for  $(C_{20}H_{11}FN_2)_n$ : C, 80.52; H, 3.72; N, 9.39%, found: C, 72.95; H, 3.63; N 7.96%.

**CTF-23:** 2,4,6-Tris[4-(4,4,5,5-tetramethyl-1,3,2-dioxaborolan-2-yl)phenyl]-1,3,5-triazine (1.00 g, 1.46 mmol), 2,5-dibromo-1,4-benzoquinone (580 mg, 2.18 mmol), *N,N*-dimethylformamide (21.8 mL), aqueous  $K_2CO_3$  (2.0 M, 4.36 mL) and  $[Pd(PPh_3)_4]$  (20.2 mg, 1.2 mol %) were used in the polymerisation. After work-up, the product was obtained as a black powder in 21% yield (146 mg). CHN analysis calc. for  $(C_{20}H_{10}N_2O_2)_n$ : C, 77.41; H, 3.25; N, 9.03%, found: C, 55.07; H, 3.04; N 5.33%.

**CTF-24:** 2,4,6-Tris[4-(4,4,5,5-tetramethyl-1,3,2-dioxaborolan-2-yl)phenyl]-1,3,5-triazine (1.00 g, 1.46 mmol), 2,5-dibromobenzene-1,4-diol (307 mg, 2.18 mmol), *N,N*-dimethylformamide (21.8 mL), aqueous  $K_2CO_3$  (2.0 M, 4.36 mL) and  $[Pd(PPh_3)_4]$  (20.2 mg, 1.2 mol %) were used in the polymerisation. After work-up, the product was obtained as a black powder in 11% yield (77 mg). CHN analysis calc. for  $(C_{20}H_{12}N_2O_2)_n$ : C, 76.91; H, 3.87; N, 8.97%, found: C, 46.78; H, 2.86; N 4.82%.

**CTF-25:** 2,4,6-Tris[4-(4,4,5,5-tetramethyl-1,3,2-dioxaborolan-2-yl)phenyl]-1,3,5-triazine (500 mg, 728  $\mu$ mol), 1,4-dibromo-2,5-dimethoxybenzene (323 mg, 1.09 mmol), *N,N*-dimethylformamide (10.9 mL), aqueous  $K_2CO_3$  (2.0 M, 2.18 mL) and  $[Pd(PPh_3)_4]$  (10.1 mg, 1.2 mol %) were used in the polymerisation. After work-up, the product was obtained as a pale yellow powder in 98% yield (364 mg). CHN analysis calc. for  $(C_{22}H_{16}N_2O_2)_n$ : C, 77.63; H, 4.74; N, 8.23%, found: C, 73.95; H, 4.74; N 7.92%.

**CTF-26:** 2,4,6-Tris[4-(4,4,5,5-tetramethyl-1,3,2-dioxaborolan-2-yl)phenyl]-1,3,5-triazine (500 mg, 728  $\mu$ mol), 6,6'-dibromo-2,2'-bipyridine (343 mg, 1.09 mmol), *N,N*-dimethylformamide (10.9 mL), aqueous  $K_2CO_3$  (2.0 M, 2.18 mL) and  $[Pd(PPh_3)_4]$  (10.1 mg, 1.2 mol %) were used in the polymerisation. After work-up, the product was obtained as a white powder in 99% yield (389 mg). CHN analysis calc. for  $(C_{24}H_{14}N_4)_n$ : C, 80.43; H, 3.94; N, 15.63%, found: C, 75.02; H, 3.83; N 14.42%.

**CTF-27:** 2,4,6-Tris[4-(4,4,5,5-tetramethyl-1,3,2-dioxaborolan-2-yl)phenyl]-1,3,5-triazine (500 mg, 728  $\mu$ mol), 5,5'-dibromo-2,2'-bipyridine (343 mg, 1.09 mmol), *N,N*-dimethylformamide (10.9 mL), aqueous  $K_2CO_3$  (2.0 M, 2.18 mL) and  $[Pd(PPh_3)_4]$  (10.1 mg, 1.2 mol %) were used in the polymerisation. After work-up, the product was obtained as a pale yellow powder in 90% yield (352 mg). CHN analysis calc. for  $(C_{24}H_{14}N_4)_n$ : C, 80.43; H, 3.94; N, 15.63%, found: C, 69.48; H, 3.68; N 12.75%.

**CTF-28:** 2,4,6-Tris[4-(4,4,5,5-tetramethyl-1,3,2-dioxaborolan-2-yl)phenyl]-1,3,5-triazine (500 mg, 728  $\mu$ mol), 4,4'-dibromo-2,2'-bipyridine (343 mg, 1.09 mmol), *N,N*-dimethylformamide (10.9 mL), aqueous  $K_2CO_3$  (2.0 M, 2.18 mL) and  $[Pd(PPh_3)_4]$  (10.1 mg, 1.2 mol %) were used in the polymerisation. After work-up, the product was obtained as a grey powder in 70% yield (276 mg). CHN analysis calc. for  $(C_{24}H_{14}N_4)_n$ : C, 80.43; H, 3.94; N, 15.63%, found: C, 70.24; H, 4.17; N 12.68%.

**CTF-29:** 2,4,6-Tris[4-(4,4,5,5-tetramethyl-1,3,2-dioxaborolan-2-yl)phenyl]-1,3,5-triazine (500 mg, 728  $\mu$ mol), 3,8-dibromo-1,10-phenanthroline (369 mg, 1.09 mmol), *N,N*-dimethylformamide (10.9 mL), aqueous  $K_2CO_3$  (2.0 M, 2.18 mL) and  $[Pd(PPh_3)_4]$  (10.1 mg, 1.2 mol %) were used in the polymerisation. After work-up, the product was obtained as a brown powder in 53% yield (225 mg). CHN analysis calc. for  $(C_{26}H_{14}N_4)_n$ : C, 81.66; H, 3.69; N, 14.65%, found: C, 73.83; H, 3.98; N 12.93%.

**CTF-30:** 2,4,6-Tris[4-(4,4,5,5-tetramethyl-1,3,2-dioxaborolan-2-yl)phenyl]-1,3,5-triazine (500 mg, 728  $\mu$ mol), 2,5-dibromopyrazine (260 mg, 1.09 mmol), *N,N*-dimethylformamide (10.9 mL), aqueous  $K_2CO_3$  (2.0 M, 2.18 mL) and  $[Pd(PPh_3)_4]$  (10.1 mg, 1.2 mol %) were used in the polymerisation. After work-up, the product was obtained as a grey powder in 61% yield (188 mg). CHN analysis calc. for  $(C_{18}H_{10}N_4)_n$ : C, 76.58; H, 3.57; N 19.85%, found: C, 65.12; H, 3.61; N 15.31%.

**CTF-31:** 2,4,6-Tris[4-(4,4,5,5-tetramethyl-1,3,2-dioxaborolan-2-yl)phenyl]-1,3,5-triazine (500 mg, 728  $\mu\text{mol}$ ), 2,5-dibromopyrimidine (260 mg, 1.09 mmol), *N,N*-dimethylformamide (10.9 mL), aqueous  $\text{K}_2\text{CO}_3$  (2.0 M, 2.18 mL) and  $[\text{Pd}(\text{PPh}_3)_4]$  (10.1 mg, 1.2 mol %) were used in the polymerisation. After work-up, the product was obtained as a pale brown powder in 80% yield (248 mg). CHN analysis calc. for  $(\text{C}_{18}\text{H}_{10}\text{N}_4)_n$ : C, 76.58; H, 3.57; N 19.85%, found: C, 66.33; H, 3.51; N 17.09%.

**CTF-32** 2,4,6-Tris[4-(4,4,5,5-tetramethyl-1,3,2-dioxaborolan-2-yl)phenyl]-1,3,5-triazine (500 mg, 728  $\mu\text{mol}$ ), 2,5-dibromopyridine (259 mg, 1.09 mmol), *N,N*-dimethylformamide (10.9 mL), aqueous  $\text{K}_2\text{CO}_3$  (2.0 M, 2.18 mL) and  $[\text{Pd}(\text{PPh}_3)_4]$  (10.1 mg, 1.2 mol %) were used in the polymerisation. After work-up, the product was obtained as a yellow powder in 99% yield (305 mg). CHN analysis calc. for  $(\text{C}_{19}\text{H}_{11}\text{N}_3)_n$ : C, 81.12; H, 3.94; N, 14.94%, found: C, 70.97; H, 3.74; N 12.63%.

**CTF-33:** 2,4,6-Tris[4-(4,4,5,5-tetramethyl-1,3,2-dioxaborolan-2-yl)phenyl]-1,3,5-triazine (500 mg, 728  $\mu\text{mol}$ ), 2,6-dibromopyridine (259 mg, 1.09 mmol), *N,N*-dimethylformamide (10.9 mL), aqueous  $\text{K}_2\text{CO}_3$  (2.0 M, 2.18 mL) and  $[\text{Pd}(\text{PPh}_3)_4]$  (10.1 mg, 1.2 mol %) were used in the polymerisation. After work-up, the product was obtained as a pale yellow powder in 99% yield (304 mg). CHN analysis calc. for  $(\text{C}_{19}\text{H}_{11}\text{N}_3)_n$ : C, 81.12; H, 3.94; N, 14.94%, found: C, 63.19; H, 3.51; N 10.21%.

**CTF-34:** 2,4,6-Tris[4-(4,4,5,5-tetramethyl-1,3,2-dioxaborolan-2-yl)phenyl]-1,3,5-triazine (500 mg, 728  $\mu\text{mol}$ ), 3,7-dibromo dibenzo[*b,d*]thiophene-*S,S*-dioxide (408 mg, 1.09 mmol), *N,N*-dimethylformamide (10.9 mL), aqueous  $\text{K}_2\text{CO}_3$  (2.0 M, 2.18 mL) and  $[\text{Pd}(\text{PPh}_3)_4]$  (10.1 mg, 1.2 mol %) were used in the polymerisation. After work-up, the product was obtained as a pale yellow powder in 98% yield (452 mg). CHN analysis calc. for  $(\text{C}_{26}\text{H}_{14}\text{N}_2\text{O}_2\text{S})_n$ : C, 74.63; H, 3.37; N, 6.69%, found: C, 66.00; H, 3.49; N 5.55%.

**CTF-35:** 2,4,6-Tris[4-(4,4,5,5-tetramethyl-1,3,2-dioxaborolan-2-yl)phenyl]-1,3,5-triazine (500 mg, 728  $\mu\text{mol}$ ), 3,7-dibromo dibenzo[*b,d*]thiophene (373 mg, 1.09 mmol), *N,N*-dimethylformamide (10.9 mL), aqueous  $\text{K}_2\text{CO}_3$  (2.0 M, 2.18 mL) and  $[\text{Pd}(\text{PPh}_3)_4]$  (10.1 mg, 1.2 mol %) were used in the polymerisation. After work-up, the product was obtained as a pale yellow powder in 99% yield (420 mg). CHN analysis calc. for  $(\text{C}_{26}\text{H}_{14}\text{N}_2\text{S})_n$ : C, 80.80; H, 3.65; N, 7.25%, found: C, 73.42; H, 3.64; N 6.29%.

**CTF-36:** 2,4,6-Tris[4-(4,4,5,5-tetramethyl-1,3,2-dioxaborolan-2-yl)phenyl]-1,3,5-triazine (500 mg, 728  $\mu\text{mol}$ ), 2,7-dibromo-9*H*-fluorene (354 mg, 1.09 mmol), *N,N*-dimethylformamide (10.9 mL), aqueous  $\text{K}_2\text{CO}_3$  (2.0 M, 2.18 mL) and  $[\text{Pd}(\text{PPh}_3)_4]$  (10.1 mg, 1.2 mol %) were used in the polymerisation. After work-up, the product was obtained as an orange powder in 99% yield (399 mg). CHN analysis calc. for  $(\text{C}_{27}\text{H}_{16}\text{N}_2)_n$ : C, 80.43; H, 3.94; N, 15.63%, found: C, 74.23; H, 3.75; N 6.13%.

**CTF-37:** 2,4,6-Tris[4-(4,4,5,5-tetramethyl-1,3,2-dioxaborolan-2-yl)phenyl]-1,3,5-triazine (500 mg, 728  $\mu$ mol), 2,7-dibromo-9*H*-carbazole (354 mg, 1.09 mmol), *N,N*-dimethylformamide (10.9 mL), aqueous  $K_2CO_3$  (2.0 M, 2.18 mL) and  $[Pd(PPh_3)_4]$  (10.1 mg, 1.2 mol %) were used in the polymerisation. After work-up, the product was obtained as a yellow powder in 99% yield (402 mg). CHN analysis calc. for  $(C_{26}H_{15}N_3)_n$ : C, 84.53; H, 4.09; N, 11.37%, found: C, 73.80; H, 4.01; N 9.32%.

**CTF-38:** 2,4,6-Tris[4-(4,4,5,5-tetramethyl-1,3,2-dioxaborolan-2-yl)phenyl]-1,3,5-triazine (500 mg, 728  $\mu$ mol), 2,7-dibromo-9-fluorenone (369 mg, 1.09 mmol), *N,N*-dimethylformamide (10.9 mL), aqueous  $K_2CO_3$  (2.0 M, 2.18 mL) and  $[Pd(PPh_3)_4]$  (10.1 mg, 1.2 mol %) were used in the polymerisation. After work-up, the product was obtained as a grey powder in 95% yield (400 mg). CHN analysis calc. for  $(C_{27}H_{14}N_2O)_n$ : C, 84.80; H, 3.69; N, 7.33%, found: C, 73.97; H, 3.66; N 5.61%.

**CTF-39:** 2,4,6-Tris[4-(4,4,5,5-tetramethyl-1,3,2-dioxaborolan-2-yl)phenyl]-1,3,5-triazine (500 mg, 728  $\mu$ mol), 4,7-dibromo-2,1,3-benzo[*c*]thiadiazole (321 mg, 1.09 mmol), *N,N*-dimethylformamide (10.9 mL), aqueous  $K_2CO_3$  (2.0 M, 2.18 mL) and  $[Pd(PPh_3)_4]$  (10.1 mg, 1.2 mol %) were used in the polymerisation. After work-up, the product was obtained as a bright orange powder in 90% yield (333 mg). CHN analysis calc. for  $(C_{20}H_{10}N_4S)_n$ : C, 70.99; H, 2.98; N, 16.56%, found: C, 65.81; H, 3.17; N 14.58%.

**CTF-40:** 2,4,6-Tris[4-(4,4,5,5-tetramethyl-1,3,2-dioxaborolan-2-yl)phenyl]-1,3,5-triazine (500 mg, 728  $\mu$ mol), 4,7-dibromobenzo[*c*][1,2,5]oxadiazole (303 mg, 1.09 mmol), *N,N*-dimethylformamide (10.9 mL), aqueous  $K_2CO_3$  (2.0 M, 2.18 mL) and  $[Pd(PPh_3)_4]$  (10.1 mg, 1.2 mol %) were used in the polymerisation. After work-up, the product was obtained as a brown powder in 90% yield (318 mg). CHN analysis calc. for  $(C_{20}H_{10}N_4O)_n$ : C, 74.53; H, 3.13; N, 17.38%, found: C, 68.02; H, 3.64; N 15.13%.

**CTF-41:** 2,4,6-Tris[4-(4,4,5,5-tetramethyl-1,3,2-dioxaborolan-2-yl)phenyl]-1,3,5-triazine (500 mg, 728  $\mu$ mol), 4,7-dibromo-2,1,3-benzo[*c*]selenadiazole (372 mg, 1.09 mmol), *N,N*-dimethylformamide (10.9 mL), aqueous  $K_2CO_3$  (2.0 M, 2.18 mL) and  $[Pd(PPh_3)_4]$  (10.1 mg, 1.2 mol %) were used in the polymerisation. After work-up, the product was obtained as an orange powder in 99% yield (418 mg). CHN analysis calc. for  $(C_{20}H_{10}N_4Se)_n$ : C, 62.35; H, 2.62; N, 14.54%, found: C, 55.40; H, 2.90; N 12.27%.

**CTF-42:** 2,4,6-Tris[4-(4,4,5,5-tetramethyl-1,3,2-dioxaborolan-2-yl)phenyl]-1,3,5-triazine (500 mg, 728  $\mu$ mol), 4,7-dibromo-5,6-difluorobenzo[*c*][1,2,5]thiadiazole (360 mg, 1.09 mmol), *N,N*-dimethylformamide (10.9 mL), aqueous  $K_2CO_3$  (2.0 M, 2.18 mL) and  $[Pd(PPh_3)_4]$  (10.1 mg, 1.2 mol %) were used in the polymerisation. After work-up, the product was obtained as a brown powder in 70% yield (364 mg). CHN analysis calc. for  $(C_{20}H_8F_2N_2S)_n$ : C, 64.17; H, 2.15; N, 14.97%, found: C, 49.90; H, 2.70; N 10.77%.



**CTF-43:** 2,4,6-Tris[4-(4,4,5,5-tetramethyl-1,3,2-dioxaborolan-2-yl)phenyl]-1,3,5-triazine (500 mg, 728  $\mu$ mol), 4,7-dibromo-5-fluoro-2,1,3-benzo[*c*]thiadiazole (340 mg, 1.09 mmol), *N,N*-dimethylformamide (10.9 mL), aqueous  $K_2CO_3$  (2.0 M, 2.18 mL) and  $[Pd(PPh_3)_4]$  (10.1 mg, 1.2 mol %) were used in the polymerisation. After work-up, the product was obtained as a grey powder in 87% yield (340 mg). CHN analysis calc. for  $(C_{20}H_9FN_4S)_n$ : C, 67.41; H, 2.55; N, 15.72%, found: C, 61.61; H, 2.83; N 13.33%.

**CTF-44:** 2,4,6-Tris[4-(4,4,5,5-tetramethyl-1,3,2-dioxaborolan-2-yl)phenyl]-1,3,5-triazine (500 mg, 728  $\mu$ mol), 5,8-dibromoquinoxaline (314 mg, 1.09 mmol), *N,N*-dimethylformamide (10.9 mL), aqueous  $K_2CO_3$  (2.0 M, 2.18 mL) and  $[Pd(PPh_3)_4]$  (10.1 mg, 1.2 mol %) were used in the polymerisation. After work-up, the product was obtained as a grey powder in 99% yield (360 mg). CHN analysis calc. for  $(C_{22}H_{12}N_4)_n$ : C, 79.50; H, 3.64; N, 16.86%, found: C, 68.12; H, 3.60; N 13.84%.

### 3. Analysis of polymers

**FT-IR** spectra showed strong vibrational bands around 1510 and 1360  $cm^{-1}$  that can be assigned to aromatic C=C bending modes. CTF-15 and CTF-16 show aryl nitrile bands at 2226  $cm^{-1}$  and 2228  $cm^{-1}$ , respectively, and CTF-23 has a broad peak at  $\sim 3430$   $cm^{-1}$  arising from the phenol linker. CTF-38 shows a strong vibration at 1710  $cm^{-1}$  that could be assigned to the carbonyl bridge head.

**TGA** Most polymers were even stable up to 450  $^{\circ}C$ , with three exceptions: CTF-23 and CTF-24 degraded rapidly under combustion in air, leading to a weight loss of 40% and 37% at 300  $^{\circ}C$ , which might indicate a low degree of polymerization. Polymer CTF-25 showed a weight loss of 29% between 381-394  $^{\circ}C$ , which could be due to the thermal cleavage of the methyl or methoxy-group.

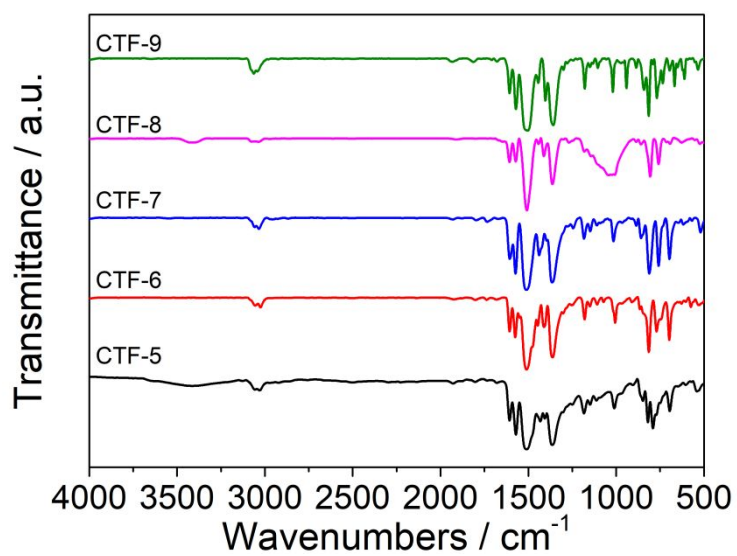

**Figure S-1:** FT-IR spectra for polymers CTF-5 to CTF-9 (KBr-pellets).

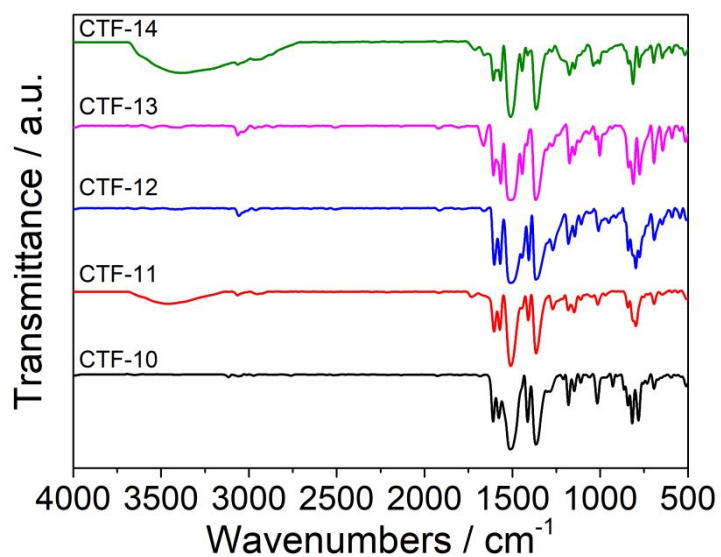

**Figure S-2:** FT-IR spectra for polymers CTF-10 to CTF-14 (KBr-pellets).

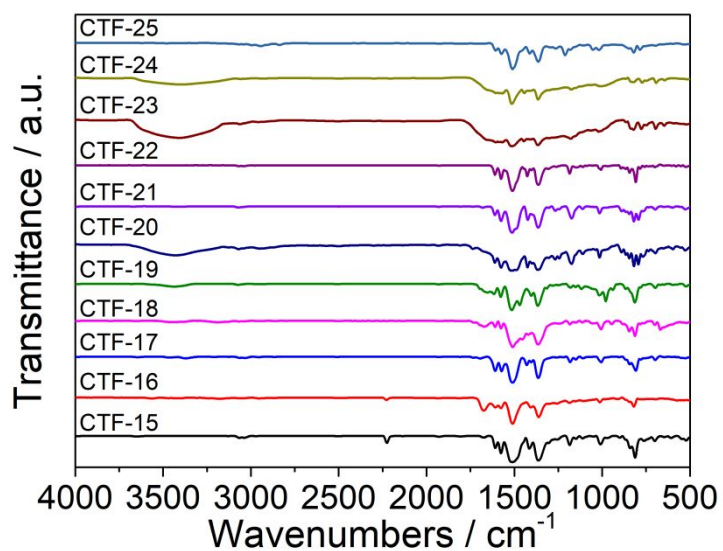

**Figure S-3:** FT-IR spectra for polymers CTF-15 to CTF-25 (KBr-pellets).

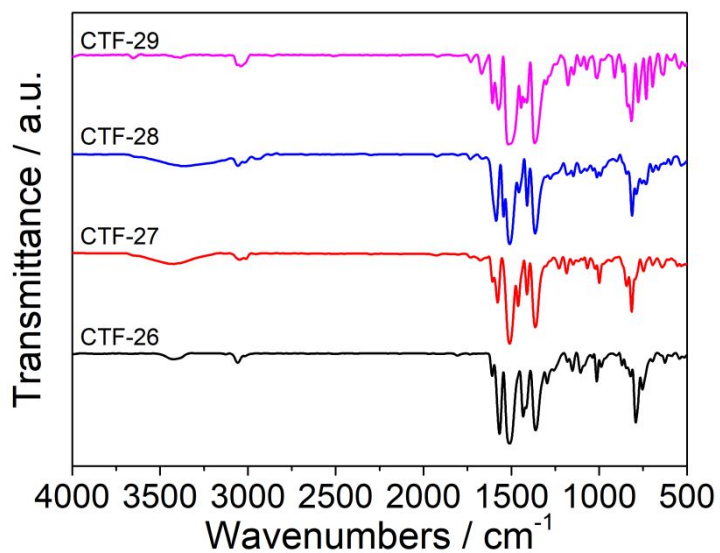

**Figure S-4:** FT-IR spectra for polymers CTF-26 to CTF-29 (KBr-pellets).

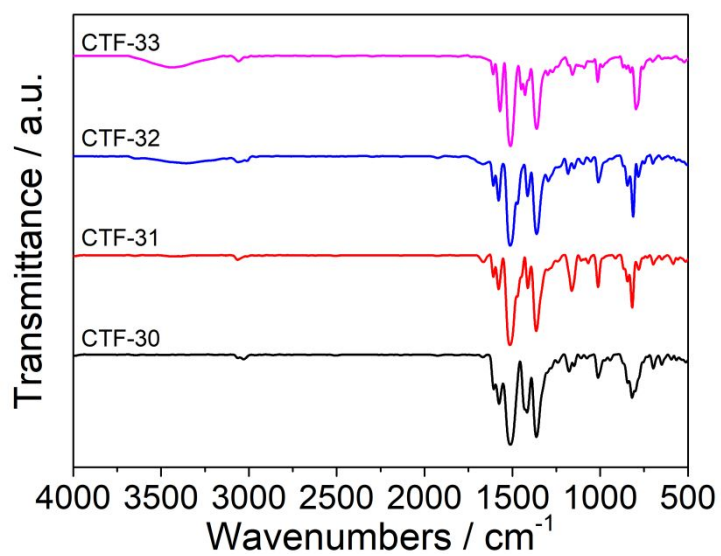

**Figure S-5:** FT-IR spectra for polymers CTF-30 to CTF-33 (KBr-pellets).

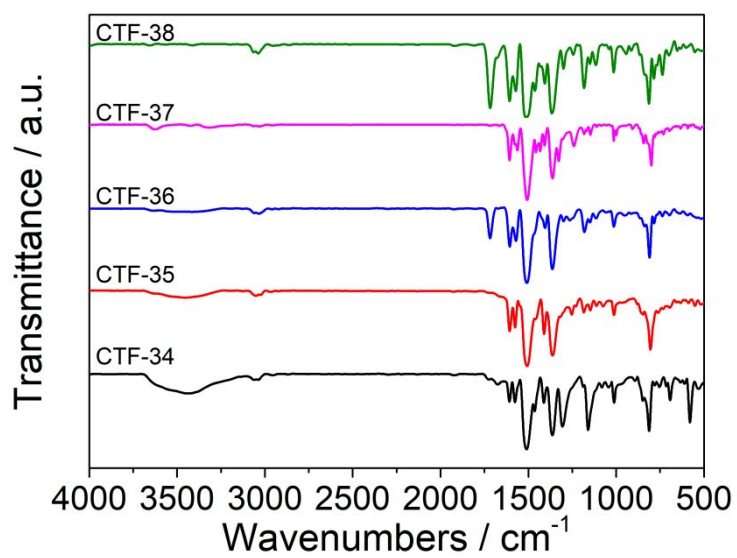

**Figure S-6:** FT-IR spectra for polymers CTF-34 to CTF-38 (KBr-pellets).

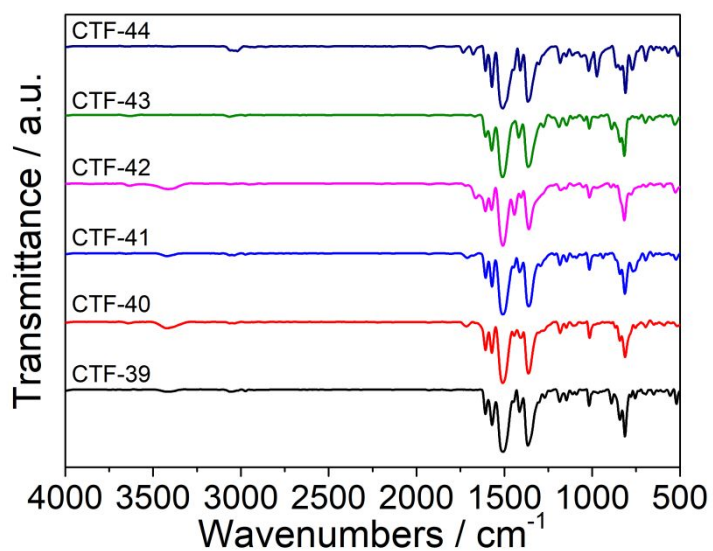

**Figure S-7:** FT-IR spectra for polymers CTF-39 to CTF-44 (KBr-pellets).

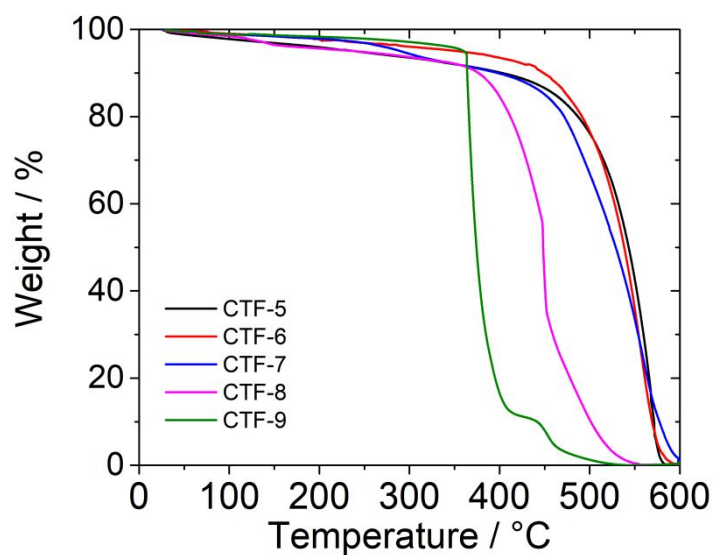

**Figure S-8:** Thermogravimetric analysis curves for the polymers CTF-5 to CTF-9 in air with a heating rate of 10 °C min<sup>-1</sup>.

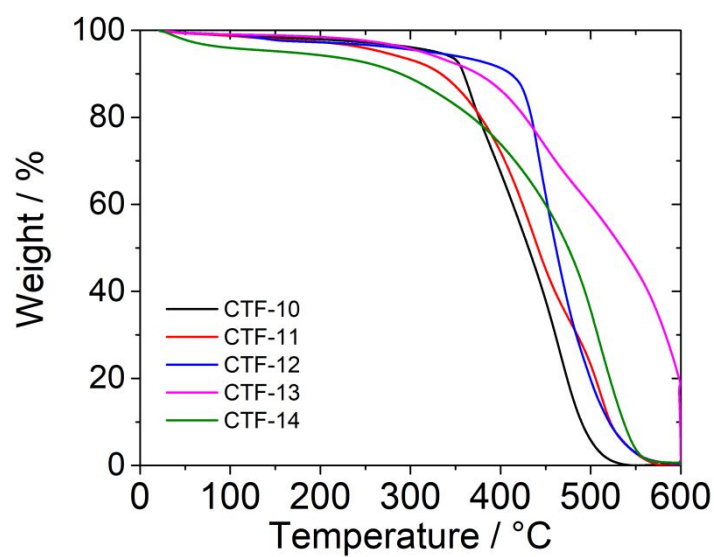

**Figure S-9:** Thermogravimetric analysis curves for the polymers CTF-10 to CTF-14 in air with a heating rate of  $10\text{ }^{\circ}\text{C min}^{-1}$ .

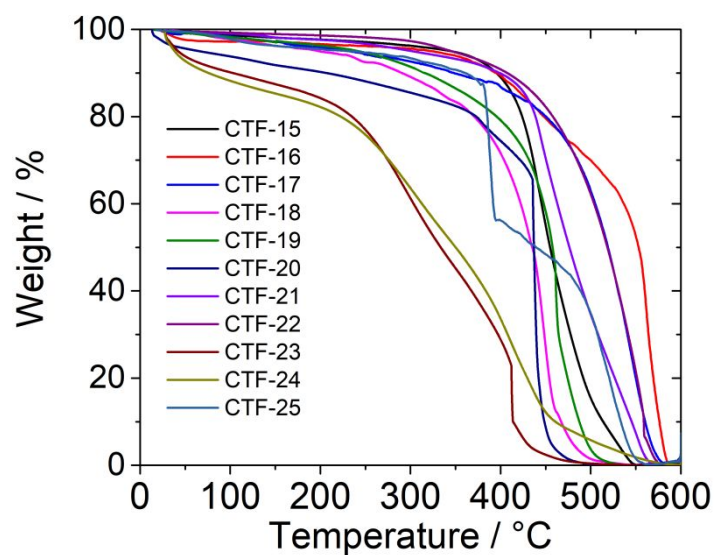

**Figure S-10:** Thermogravimetric analysis curves for the polymers CTF-15 to CTF-25 in air with a heating rate of  $10\text{ }^{\circ}\text{C min}^{-1}$ .

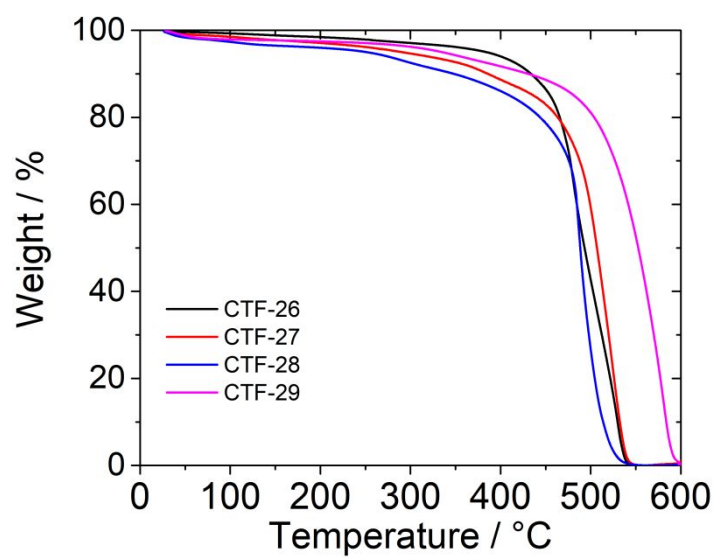

**Figure S-11:** Thermogravimetric analysis curves for the polymers CTF-26 to CTF-29 in air with a heating rate of  $10\text{ }^{\circ}\text{C min}^{-1}$ .

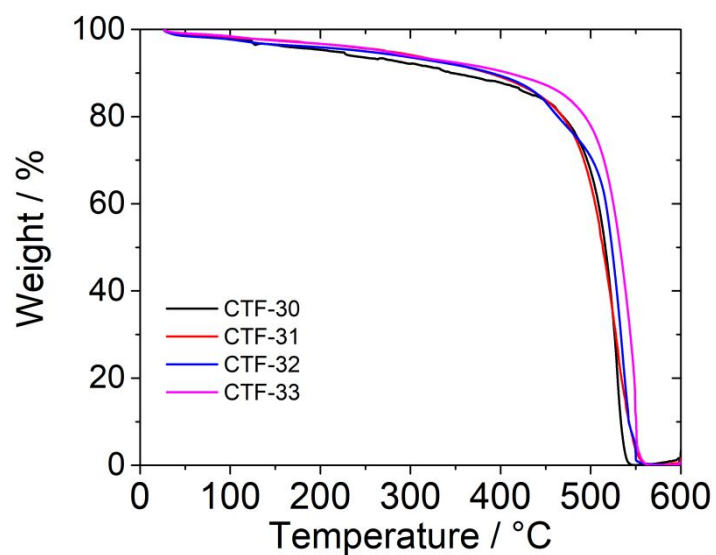

**Figure S-12:** Thermogravimetric analysis curves for the polymers CTF-30 to CTF-33 in air with a heating rate of  $10\text{ }^{\circ}\text{C min}^{-1}$ .

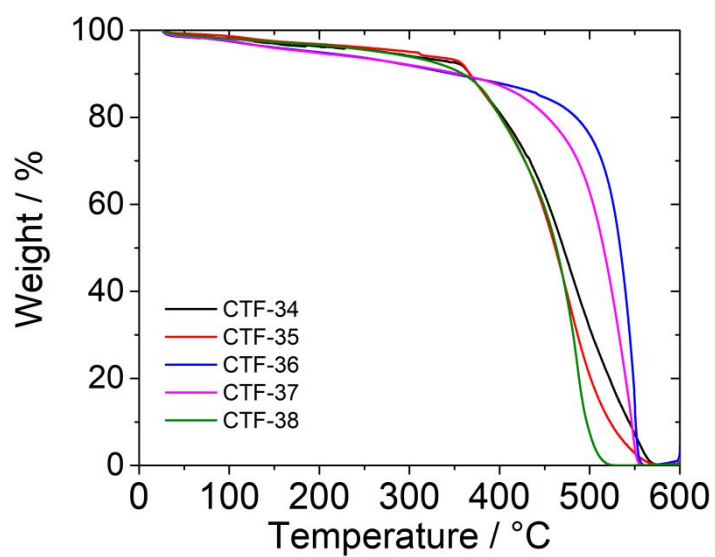

**Figure S-13:** Thermogravimetric analysis curves for the polymers CTF-34 to CTF-38 in air with a heating rate of  $10\text{ }^{\circ}\text{C min}^{-1}$ .

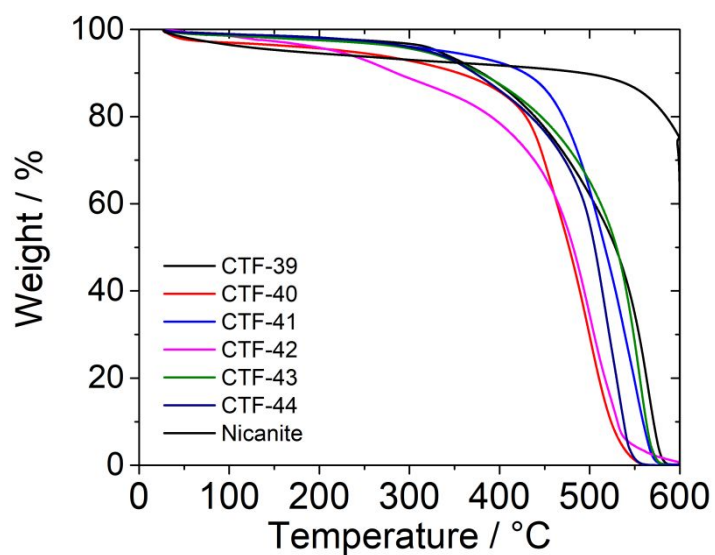

**Figure S-14:** Thermogravimetric analysis curves for the polymers CTF-39 to CTF-44 and Nicanite in air with a heating rate of  $10\text{ }^{\circ}\text{C min}^{-1}$ .



**Table S-1:** Brunauer-Emmett-Teller surface areas for CTF-5 to CTF-44, measured at 77.3 K. Reference materials CTF-2, CTF-3 Suzuki, and Nicanite are listed for comparison.

| Polymer | $SA_{\text{BET}}$ ( $\text{m}^2 \text{g}^{-1}$ ) | Polymer | $SA_{\text{BET}}$ ( $\text{m}^2 \text{g}^{-1}$ ) | Polymer      | $SA_{\text{BET}}$ ( $\text{m}^2 \text{g}^{-1}$ ) |
|---------|--------------------------------------------------|---------|--------------------------------------------------|--------------|--------------------------------------------------|
| CTF-5   | 168                                              | CTF-20  | 244                                              | CTF-35       | 446                                              |
| CTF-6   | 10                                               | CTF-21  | 482                                              | CTF-36       | 175                                              |
| CTF-7   | 121                                              | CTF-22  | 338                                              | CTF-37       | 48                                               |
| CTF-8   | 24                                               | CTF-23  | 14                                               | CTF-38       | 91                                               |
| CTF-9   | 708                                              | CTF-24  | 7                                                | CTF-39       | 536                                              |
| CTF-10  | 597                                              | CTF-25  | 488                                              | CTF-40       | 412                                              |
| CTF-11  | 184                                              | CTF-26  | 242                                              | CTF-41       | 106                                              |
| CTF-12  | 134                                              | CTF-27  | 166                                              | CTF-42       | 13                                               |
| CTF-13  | 29                                               | CTF-28  | 76                                               | CTF-43       | 281                                              |
| CTF-14  | 10                                               | CTF-29  | 365                                              | CTF-44       | 66                                               |
| CTF-15  | 383                                              | CTF-30  | 25                                               |              |                                                  |
| CTF-16  | 278                                              | CTF-31  | 33                                               |              |                                                  |
| CTF-17  | 326                                              | CTF-32  | 160                                              | CTF-2        | 560                                              |
| CTF-18  | 136                                              | CTF-33  | 99                                               | CTF-3 Suzuki | 380                                              |
| CTF-19  | 461                                              | CTF-34  | 397                                              | Nicanite     | 23                                               |

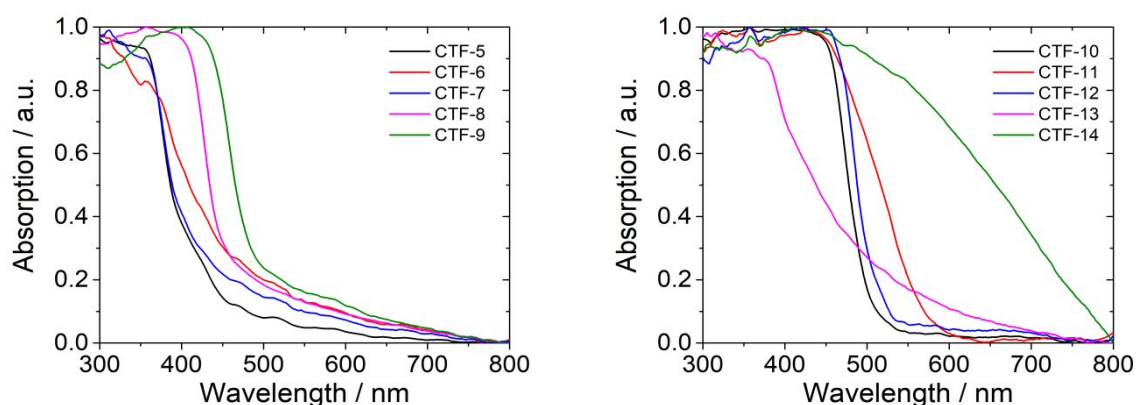

**Figure S-15:** Solid-state UV-Vis spectra of CTF-5 to CTF-9 and CTF-10 to CTF-14.

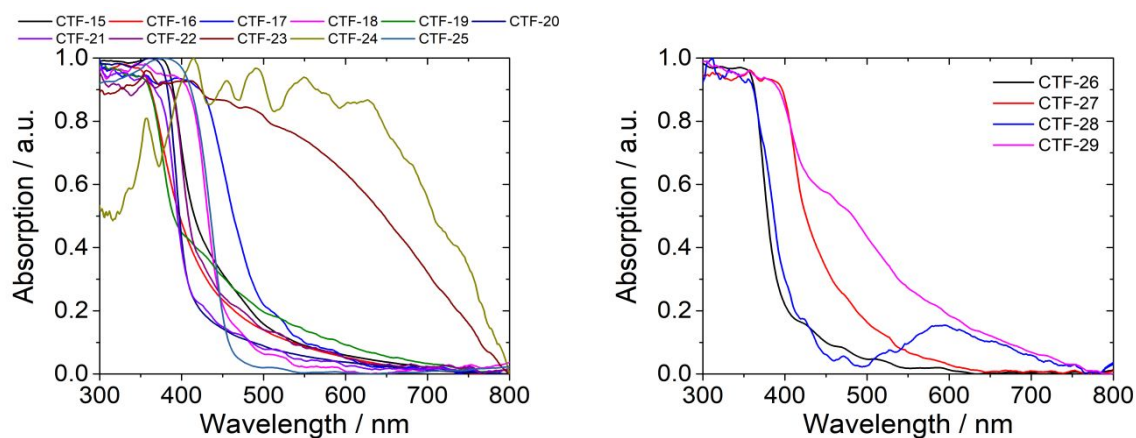

**Figure S-16:** Solid-state UV-Vis spectra of CTF-15 to CTF-25 and CTF-26 to CTF-29.

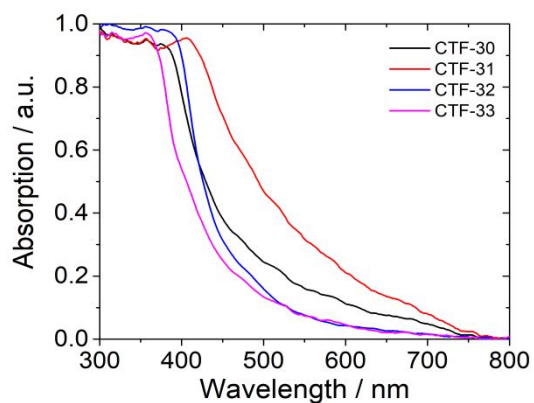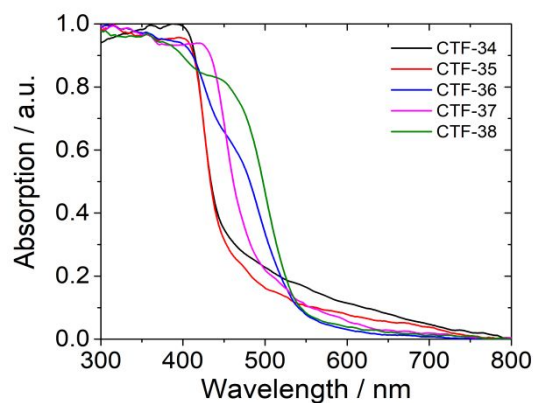

**Figure S-17:** Solid-state UV-Vis spectra of CTF-30 to CTF-33 and CTF-34 to CTF-38.

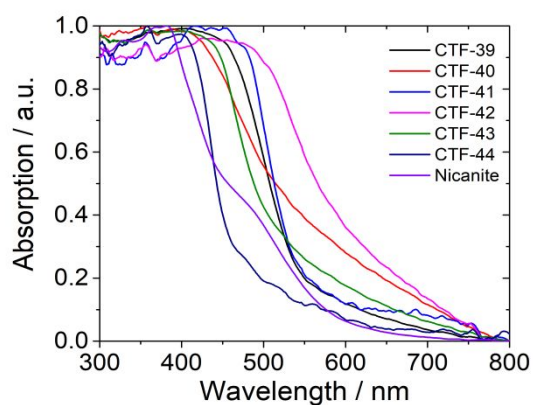

**Figure S-18:** Solid-state UV-Vis spectra of CTF-39 to CTF-44 and Nicanite.

**Table S-2:** Overview of the optical properties for the polymers.

| Polymer  | Optical-gap <sup>a</sup><br>/ eV | $\lambda_{\max}^b$<br>/ nm | $\lambda_{\max}^b$<br>/ eV | $\lambda_{\text{exc}}^d$<br>/ nm | $\lambda_{\text{em}}^d$<br>/ nm | HER $\lambda > 420 \text{ nm}^e$<br>/ $\mu\text{mol g}^{-1} \text{ h}^{-1}$ |
|----------|----------------------------------|----------------------------|----------------------------|----------------------------------|---------------------------------|-----------------------------------------------------------------------------|
| CTF-5    | 2.93                             | 318                        | 3.90                       | 280                              | 464                             | 20 ± 2                                                                      |
| CTF-6    | 2.58                             | 356                        | 3.48                       | 280                              | 468                             | 8 ± 1                                                                       |
| CTF-7    | 2.90                             | 355                        | 3.49                       | 280                              | 465                             | 20 ± 6                                                                      |
| CTF-8    | 2.51                             | 376                        | 3.30                       | 280                              | 481                             | 571 ± 37                                                                    |
| CTF-9    | 2.49                             | 407                        | 3.05                       | 360                              | 563                             | 63 ± 3                                                                      |
| CTF-10   | 2.25                             | 409                        | 3.03                       | 360                              | 537                             | 1412 ± 63                                                                   |
| CTF-11   | 2.15                             | 426                        | 2.91                       | 360                              | 576                             | 1151 ± 29                                                                   |
| CTF-12   | 2.41                             | 451                        | 2.75                       | 280                              | 435                             | 1515 ± 66                                                                   |
| CTF-13   | 2.57                             | 374                        | 3.32                       | 280                              | 435                             | 72 ± 3                                                                      |
| CTF-14   | 1.55                             | 479                        | 2.59                       | 280                              | 463                             | 16 ± 2                                                                      |
| CTF-15   | 2.58                             | 374                        | 3.32                       | 280                              | 461                             | 2946 ± 381                                                                  |
| CTF-16   | 2.60                             | 359                        | 3.45                       | 280                              | 462                             | 1354 ± 133                                                                  |
| CTF-17   | 2.42                             | 397                        | 3.12                       | 360                              | 530                             | 537 ± 30                                                                    |
| CTF-18   | 2.71                             | 386                        | 3.21                       | 280                              | 468                             | 5 ± 1                                                                       |
| CTF-19   | 2.91                             | 349                        | 3.55                       | 280                              | 433                             | 1158 ± 78                                                                   |
| CTF-20   | 2.71                             | 362                        | 3.43                       | 280                              | 434                             | 87 ± 2                                                                      |
| CTF-21   | 2.95                             | 355                        | 3.49                       | 280                              | 435                             | 550 ± 28                                                                    |
| CTF-22   | 2.86                             | 379                        | 3.27                       | 280                              | 437                             | 413 ± 39                                                                    |
| CTF-23   | 1.56                             | 413                        | 3.00                       | 280                              | 433                             | 5 ± 1                                                                       |
| CTF-24   | 1.52                             | 626                        | 1.98                       | 280                              | 400                             | 0 <sup>f</sup>                                                              |
| CTF-25   | 2.69                             | 381                        | 3.25                       | 280                              | 485                             | 548 ± 97                                                                    |
| CTF-26   | 3.08                             | 345                        | 3.59                       | 280                              | 420                             | 67 ± 1                                                                      |
| CTF-27   | 2.70                             | 378                        | 3.28                       | 280                              | 519                             | 911 ± 37                                                                    |
| CTF-28   | 2.96                             | 355                        | 3.49                       | 280                              | 427                             | 119 ± 2                                                                     |
| CTF-29   | 2.68                             | 374                        | 3.32                       | 280                              | 470                             | 371 ± 39                                                                    |
| CTF-30   | 2.62                             | 375                        | 3.31                       | 280                              | 473                             | 1561 ± 150                                                                  |
| CTF-31   | 2.21                             | 406                        | 3.05                       | 360                              | 560                             | 650 ± 45                                                                    |
| CTF-32   | 2.69                             | 375                        | 3.31                       | 280                              | 460                             | 1041 ± 70                                                                   |
| CTF-33   | 2.86                             | 355                        | 3.49                       | 280                              | 468                             | 260 ± 20                                                                    |
| CTF-34   | 2.69                             | 392                        | 3.16                       | 280                              | 474                             | 2373 ± 25                                                                   |
| CTF-35   | 2.70                             | 398                        | 3.12                       | 280                              | 471                             | 600 ± 22                                                                    |
| CTF-36   | 2.28                             | 374                        | 3.32                       | 360                              | 579                             | 160 ± 13                                                                    |
| CTF-37   | 2.50                             | 418                        | 2.97                       | 280                              | 501                             | 507 ± 33                                                                    |
| CTF-38   | 2.28                             | 374                        | 3.32                       | 360                              | 581                             | 150 ± 15                                                                    |
| CTF-39   | 2.21                             | 403                        | 3.08                       | 360                              | 567                             | 1151 ± 75                                                                   |
| CTF-40   | 2.07                             | 409                        | 3.03                       | 280                              | 435                             | 33 ± 3                                                                      |
| CTF-41   | 2.24                             | 455                        | 2.72                       | 360                              | 564                             | 0 <sup>f</sup>                                                              |
| CTF-42   | 1.91                             | 455                        | 2.72                       | 280                              | 436                             | 100 ± 2                                                                     |
| CTF-43   | 2.30                             | 406                        | 3.05                       | 360                              | 548                             | 652 ± 45                                                                    |
| CTF-44   | 2.60                             | 399                        | 3.10                       | 280                              | 493                             | 44 ± 1                                                                      |
|          |                                  |                            |                            |                                  |                                 |                                                                             |
| CTF-2    | 2.58                             | 398                        | 3.12                       | 280                              | 441                             | 358 ± 21                                                                    |
| CTF-3    |                                  |                            |                            |                                  |                                 |                                                                             |
| Suzuki   | 2.90                             | 377                        | 3.29                       | 280                              | 440                             | 158 ± 56                                                                    |
| Nicanite | 2.51                             | 383                        | 3.24                       | 280                              | 522                             | 59 ± 3                                                                      |

<sup>a</sup> The optical gap was calculated from the on-set of absorption in the solid-state UV-vis spectrum; <sup>b</sup>  $\lambda_{\max}$  was determined from the peak maximum of the most red-shifted peak in the solid state UV-Vis spectrum; <sup>c</sup> The predicted  $\lambda_{\max}$  were obtained from TD-B3LYP calculations on TPhLPhT cluster models of the CTFs (T = triazine, Ph = *para*-phenyl, L = linker, T = triazine); <sup>d</sup> Spectra see section 4. Time-Correlated Single Photon Counting Measurements; <sup>e</sup> The hydrogen evolution rate (HER) was measured with 25 mg of the samples in 8.3 mL water, 8.3 mL triethylamine, 8.3 mL methanol in presence of 3 wt. % platinum as a co-catalyst; <sup>f</sup> No hydrogen evolved during a typical 5 h run.

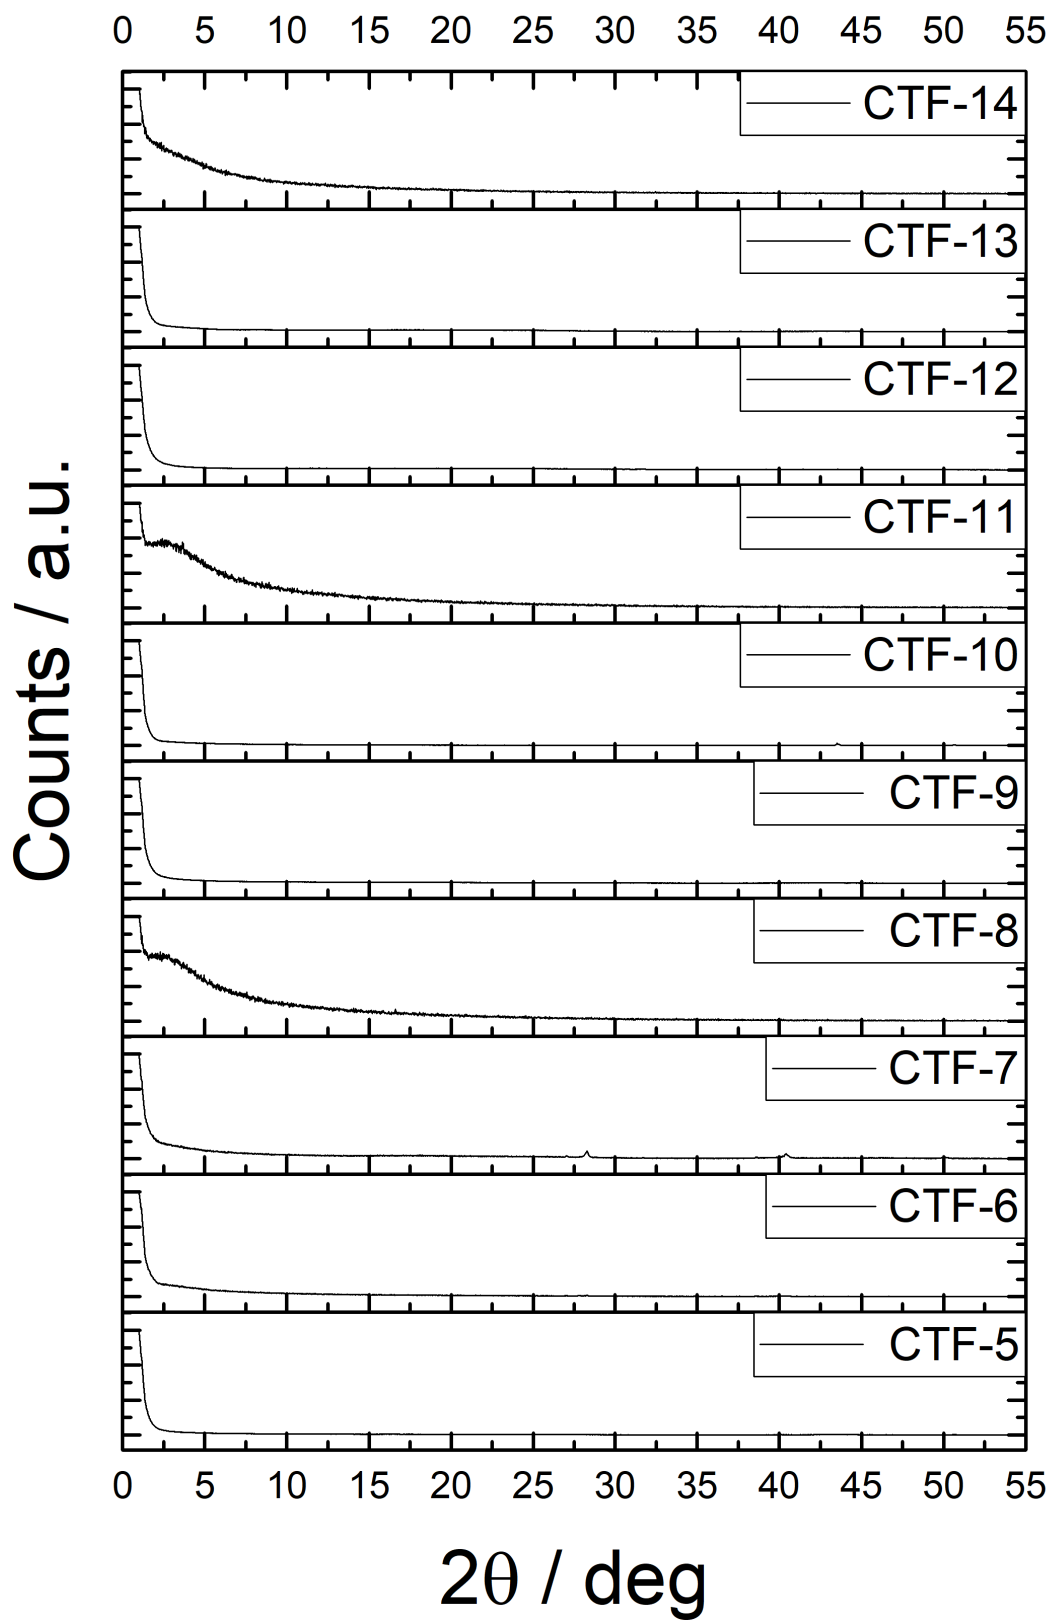

Figure S-19: Normalised PXR spectra for the polymers CTF-5 to CTF-14.

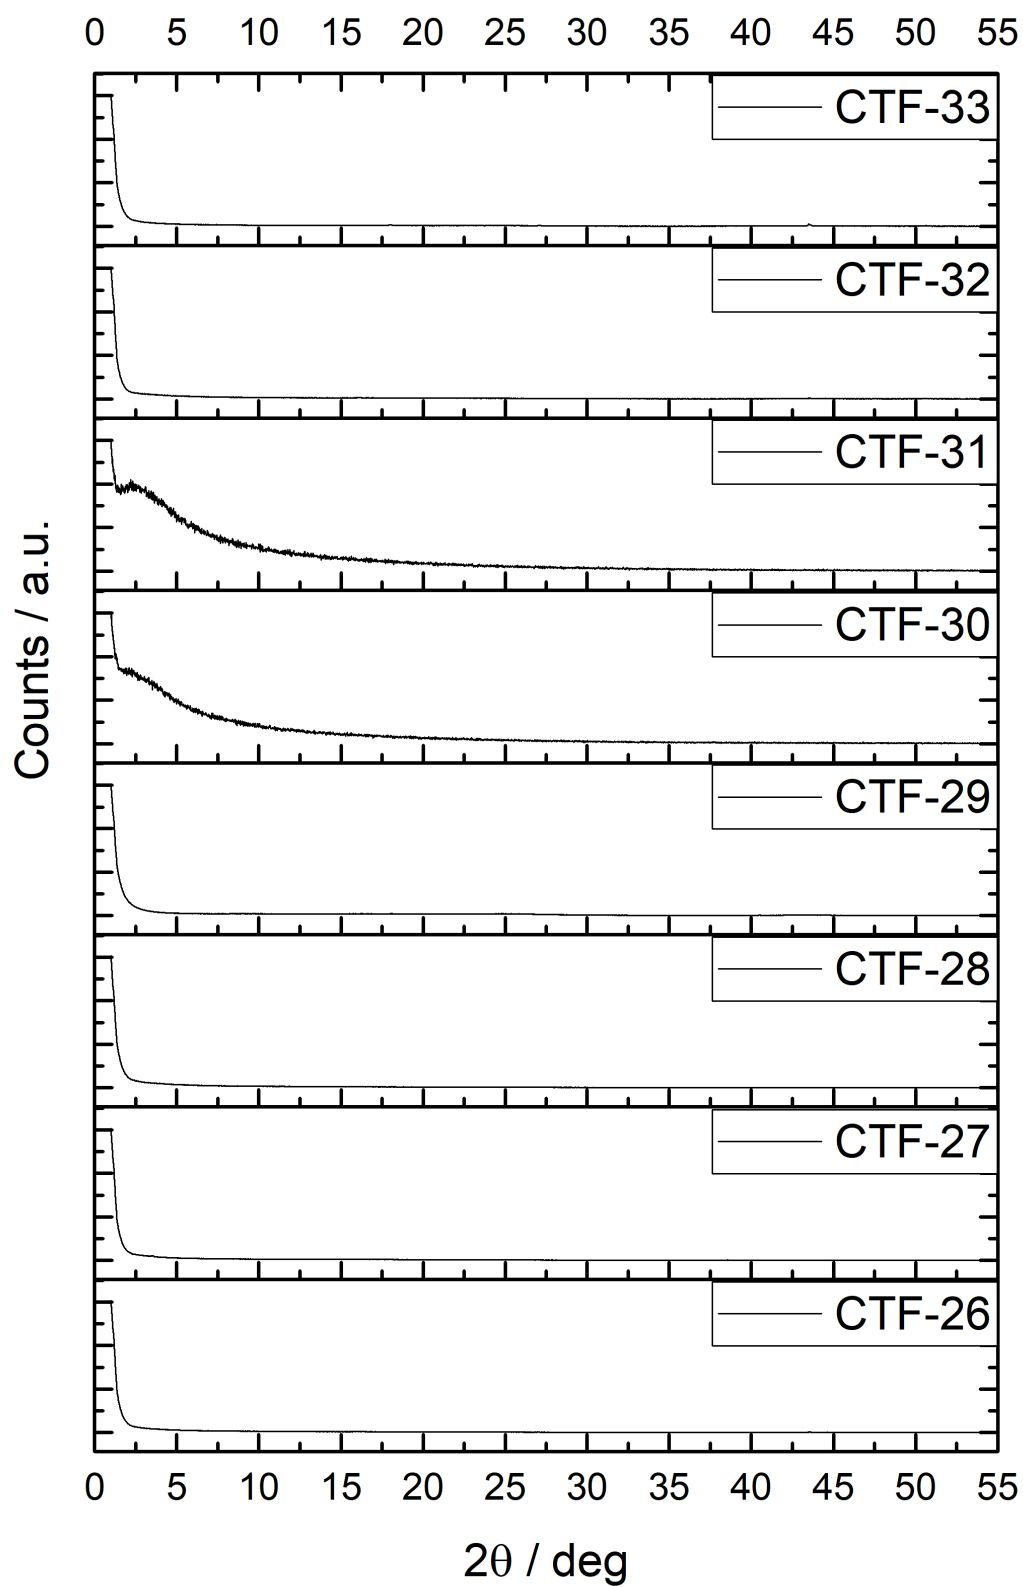

Figure S-20: Normalised PXR spectra for the polymers CTF-26 to CTF-33.

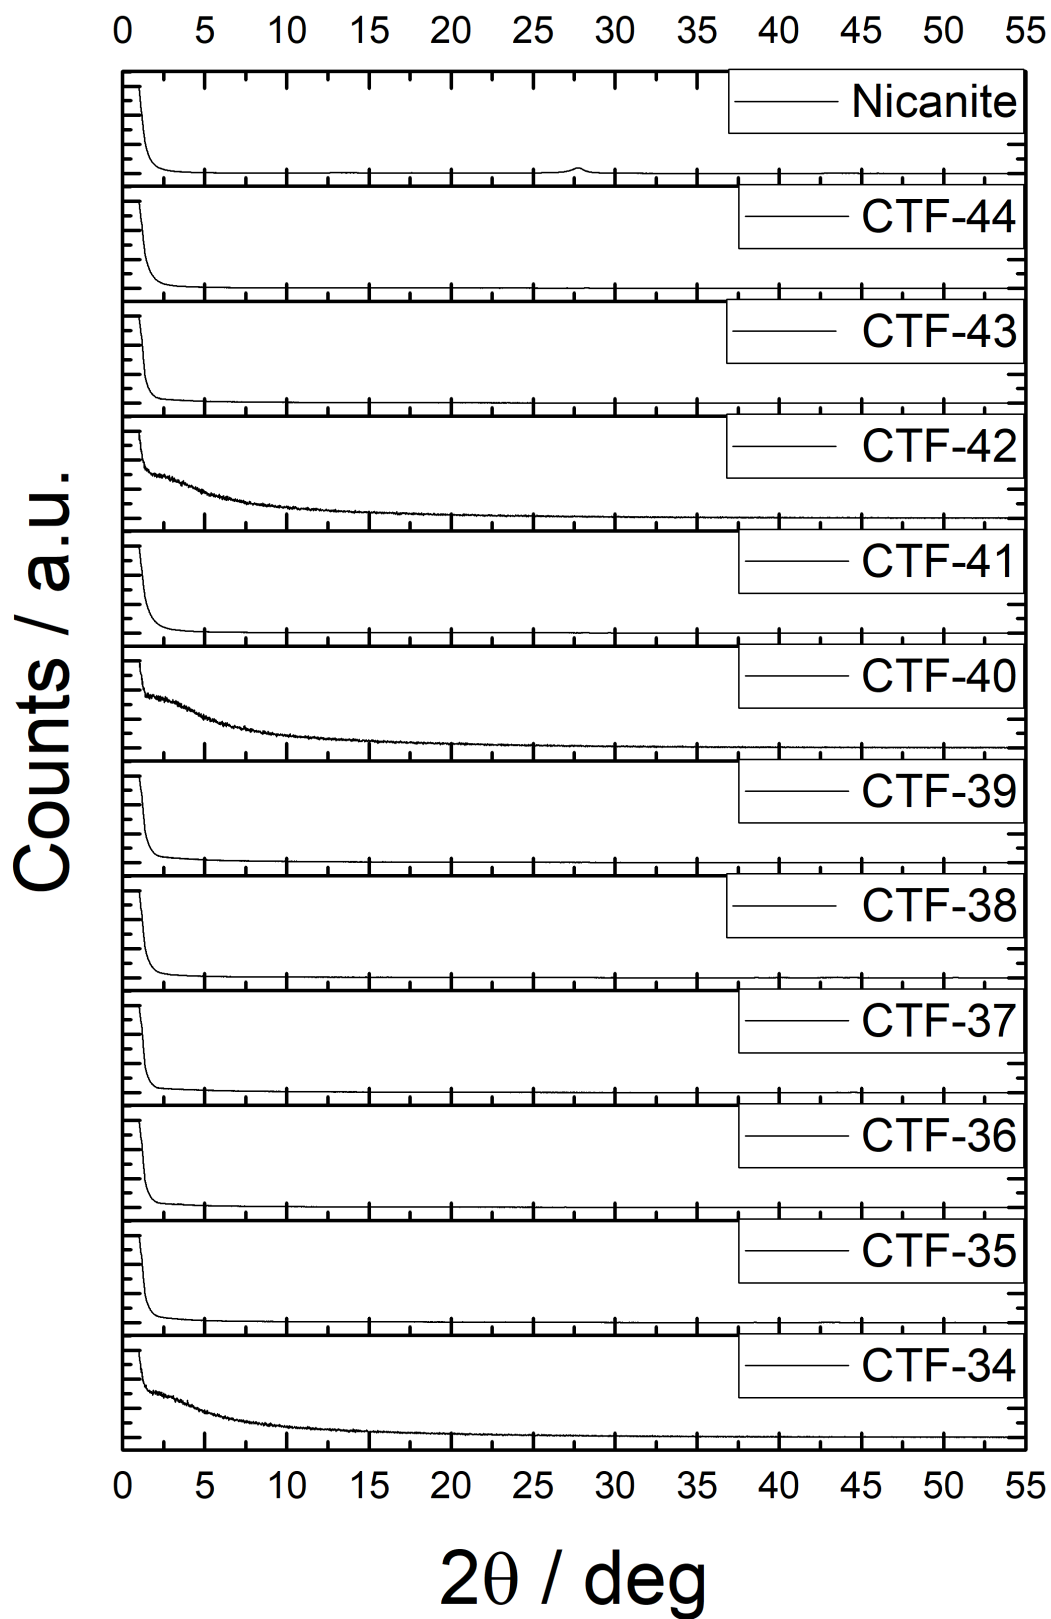

Figure S-21: Normalised PXR spectra for the polymers CTF-34 to CTF-44 and Nicanite.

**Table S-3:** Overview of the contact angles against water for the polymers CTF-5 to CTF-44 and comparison literature known polymers CTF-2 and commercially available carbon nitride (Nicanite).

| <b>Polymer</b> | <b>Contact angle (°) against water</b> | <b>Polymer</b>      | <b>Contact angle (°) against water</b> |
|----------------|----------------------------------------|---------------------|----------------------------------------|
| <b>CTF-5</b>   | 80 ± 1                                 | <b>CTF-27</b>       | 72 ± 2                                 |
| <b>CTF-6</b>   | 77 ± 5                                 | <b>CTF-28</b>       | 59 ± 2                                 |
| <b>CTF-7</b>   | 67 ± 3                                 | <b>CTF-29</b>       | 65 ± 2                                 |
| <b>CTF-8</b>   | 80 ± 5                                 | <b>CTF-30</b>       | swelling                               |
| <b>CTF-9</b>   | 95 ± 1                                 | <b>CTF-31</b>       | swelling                               |
| <b>CTF-10</b>  | 90 ± 4                                 | <b>CTF-32</b>       | swelling                               |
| <b>CTF-11</b>  | 68 ± 2                                 | <b>CTF-33</b>       | 56 ± 3                                 |
| <b>CTF-12</b>  | 70 ± 3                                 | <b>CTF-34</b>       | swelling                               |
| <b>CTF-13</b>  | 68 ± 3                                 | <b>CTF-35</b>       | 91 ± 1                                 |
| <b>CTF-14</b>  | 55 ± 7                                 | <b>CTF-36</b>       | swelling                               |
| <b>CTF-15</b>  | swelling                               | <b>CTF-37</b>       | swelling                               |
| <b>CTF-16</b>  | swelling                               | <b>CTF-38</b>       | 86 ± 4                                 |
| <b>CTF-17</b>  | swelling                               | <b>CTF-39</b>       | 78 ± 4                                 |
| <b>CTF-18</b>  | swelling                               | <b>CTF-40</b>       | swelling                               |
| <b>CTF-19</b>  | 68 ± 3                                 | <b>CTF-41</b>       | 59 ± 7                                 |
| <b>CTF-20</b>  | 87 ± 5                                 | <b>CTF-42</b>       | swelling                               |
| <b>CTF-21</b>  | 73 ± 8                                 | <b>CTF-43</b>       | swelling                               |
| <b>CTF-22</b>  | 81 ± 3                                 | <b>CTF-44</b>       | 61 ± 5                                 |
| <b>CTF-23</b>  | 64 ± 6                                 |                     |                                        |
| <b>CTF-24</b>  | 66 ± 4                                 | <b>CTF-2</b>        | swelling                               |
| <b>CTF-25</b>  | 106 ± 1                                | <b>CTF-3 Suzuki</b> | 56 ± 3                                 |
| <b>CTF-26</b>  | 66 ± 5                                 | <b>Nicanite</b>     | swelling                               |

The contact angles were measured in at least three points with three measurements, compared to the instrument standard and determined with the Young Laplace shape. The polymer disc was pressed at 10 tons with a pellet press usually used for KBr in IR experiments.

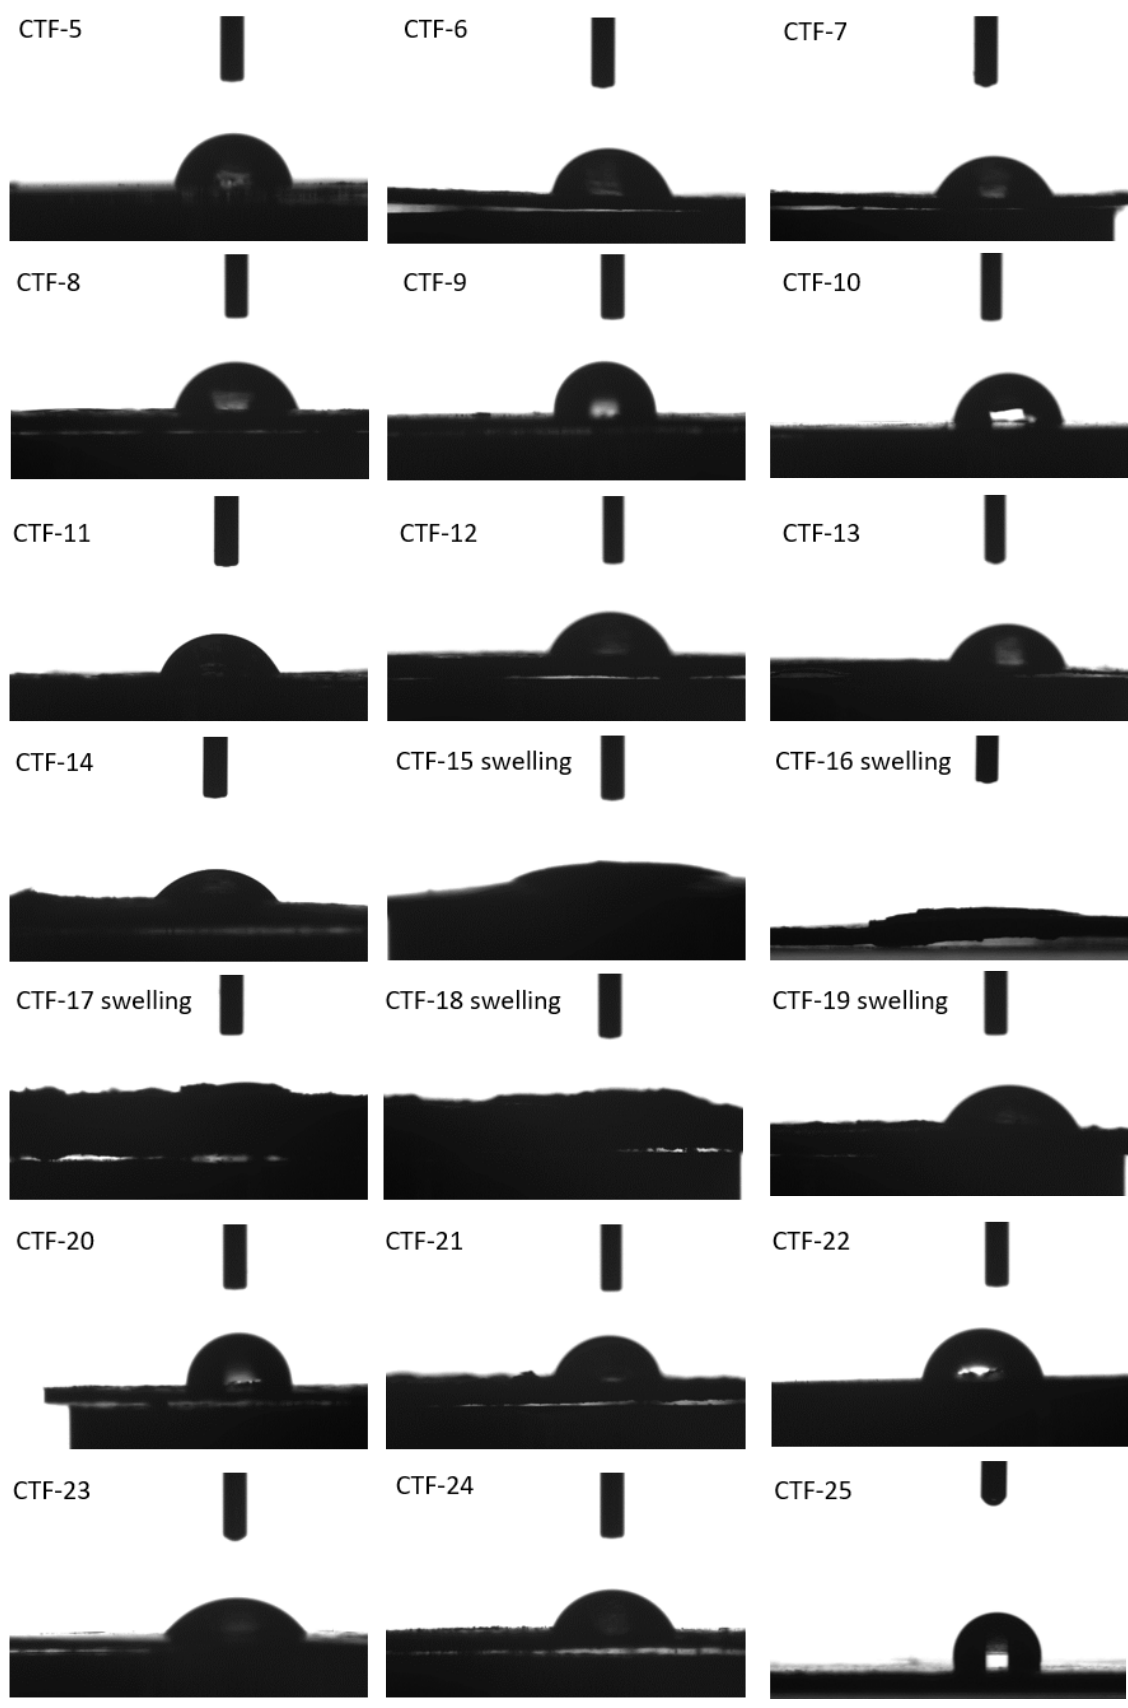

**Figure S-22:** Contact angle images from water for the polymers CTF-5 to CTF-25. For materials that swell, the picture is taken 20 seconds after the drop is deposited onto the polymer surface.



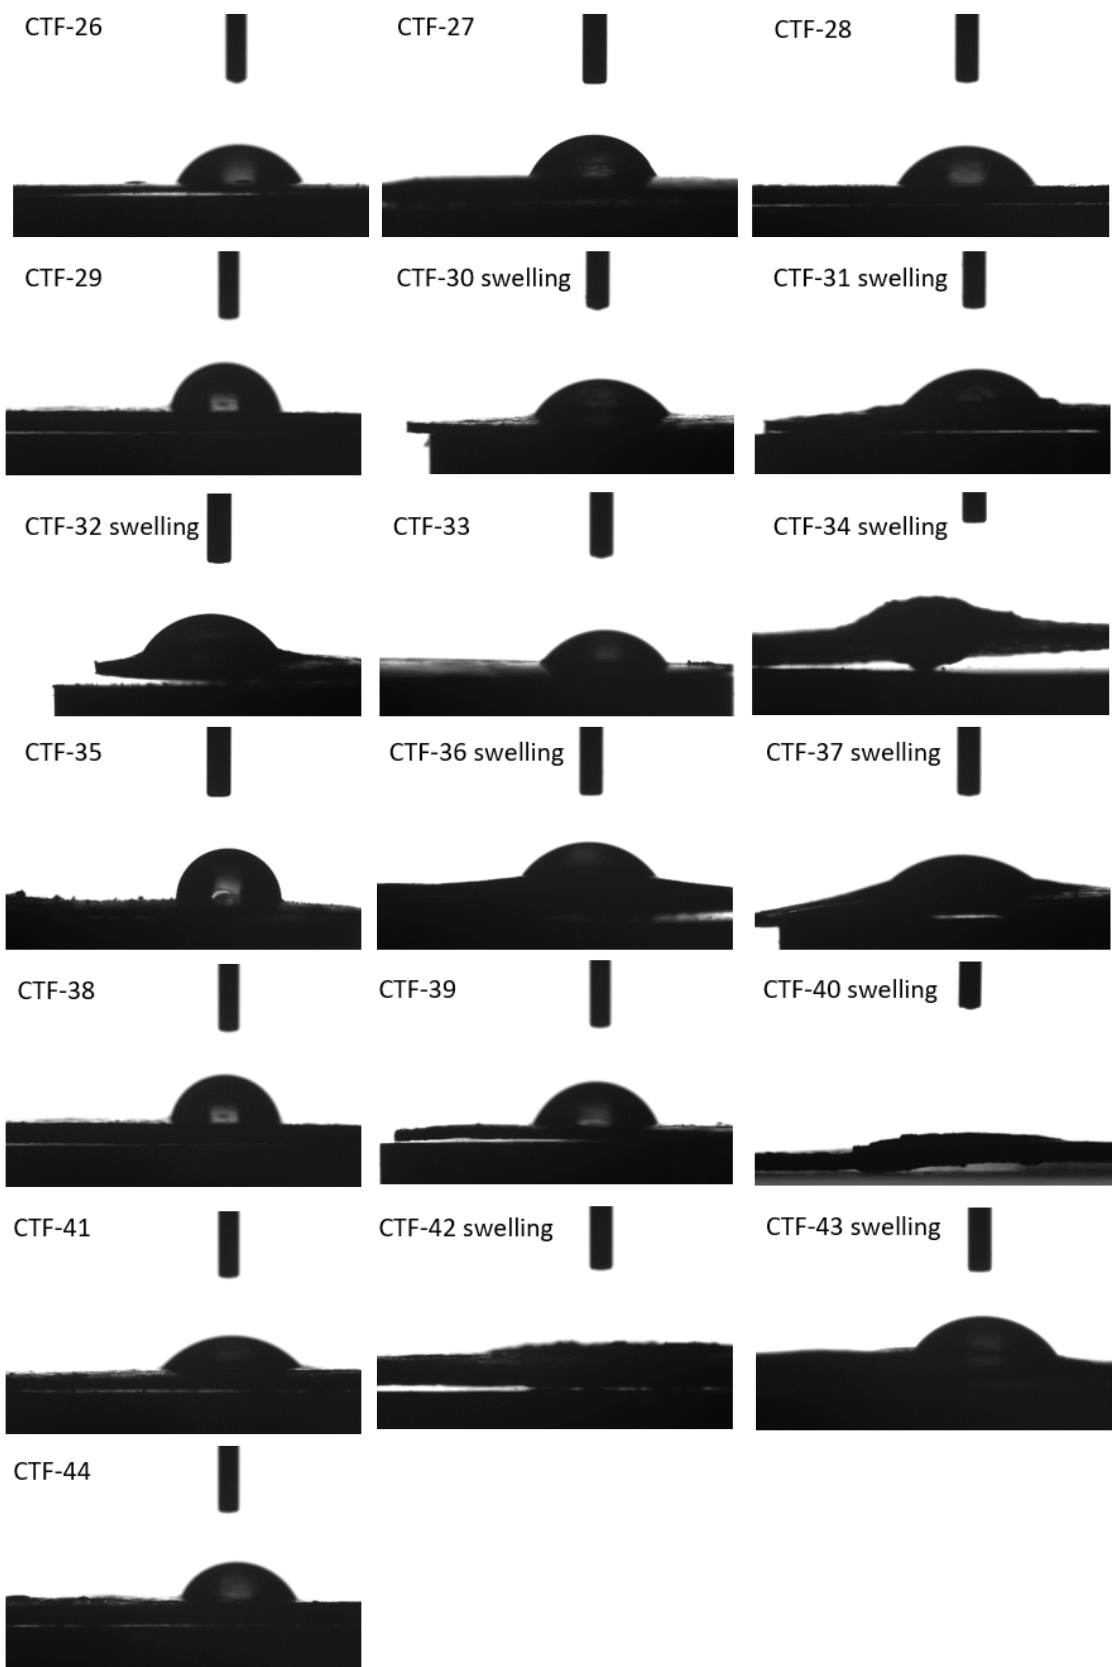

**Figure S-23:** Contact angle images from water for the polymers CTF-26 to CTF-44. For materials that swell, the picture is taken 20 seconds after the drop is deposited onto the polymer surface.

CTF-2 swelling ■

CTF-3 Suzuki ■

Nicanite swelling ■

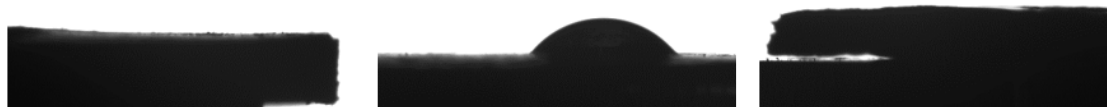

**Figure S-24:** Contact angle images from water for the polymers CTF-2 and CTF-3 Suzuki, and commercially available Nicanite. For materials that swell, the picture is taken 20 seconds after the drop is deposited onto the polymer surface.

**Table S-4:** Overview of the light obscuration from water/TEA/MeOH (1:1:1) and water for the polymers CTF-5 to CTF-44 and comparison to CTF-2 and commercially available Nicanite.

| Polymer | Transmission<br>H <sub>2</sub> O/MeOH/TEA<br>(%) <sup>a</sup> | Transmission<br>H <sub>2</sub> O<br>(%) <sup>a</sup> | Polymer      | Transmission<br>H <sub>2</sub> O/MeOH/TEA<br>(%) <sup>a</sup> | Transmission<br>H <sub>2</sub> O<br>(%) <sup>a</sup> |
|---------|---------------------------------------------------------------|------------------------------------------------------|--------------|---------------------------------------------------------------|------------------------------------------------------|
| CTF-5   | 5.4                                                           | 35.3                                                 | CTF-27       | 4.6                                                           | 8.9                                                  |
| CTF-6   | 42.8                                                          | 60.1                                                 | CTF-28       | 19.1                                                          | 27.9                                                 |
| CTF-7   | 15.1                                                          | 48.0                                                 | CTF-29       | 16.9                                                          | 34.0                                                 |
| CTF-8   | 1.5                                                           | 6.2                                                  | CTF-30       | 4.5                                                           | 3.9                                                  |
| CTF-9   | 2.9                                                           | 29.0                                                 | CTF-31       | 5.0                                                           | 3.9                                                  |
| CTF-10  | 4.9                                                           | 23.4                                                 | CTF-32       | 11.1                                                          | 8.6                                                  |
| CTF-11  | 31.3                                                          | 33.8                                                 | CTF-33       | 21.7                                                          | 28.8                                                 |
| CTF-12  | 40.4                                                          | 50.8                                                 | CTF-34       | 0.8                                                           | 83.0                                                 |
| CTF-13  | 6.8                                                           | 24.5                                                 | CTF-35       | 8.4                                                           | 28.7                                                 |
| CTF-14  | 51.4                                                          | 64.4                                                 | CTF-36       | 3.6                                                           | 3.1                                                  |
| CTF-15  | 0.8                                                           | 85.2                                                 | CTF-37       | 11.3                                                          | 61.8                                                 |
| CTF-16  | 5.6                                                           | 21.6                                                 | CTF-38       | 3.8                                                           | 12.7                                                 |
| CTF-17  | 5.7                                                           | 73.0                                                 | CTF-39       | 2.2                                                           | 20.0                                                 |
| CTF-18  | 31.4                                                          | 39.7                                                 | CTF-40       | 41.9                                                          | 13.3                                                 |
| CTF-19  | 53.3                                                          | 58.0                                                 | CTF-41       | 12.1                                                          | 23.4                                                 |
| CTF-20  | 6.2                                                           | 35.3                                                 | CTF-42       | 35.2                                                          | 72.8                                                 |
| CTF-21  | 52.2                                                          | 51.2                                                 | CTF-43       | 1.9                                                           | 3.5                                                  |
| CTF-22  | 3.7                                                           | 54.7                                                 | CTF-44       | 34.0                                                          | 57.2                                                 |
| CTF-23  | 25.5                                                          | 65.6                                                 |              |                                                               |                                                      |
| CTF-24  | 59.4                                                          | 77.6                                                 | CTF-2        | 9.5                                                           | 83.0                                                 |
| CTF-25  | 20.1                                                          | 42.7                                                 | CTF-3 Suzuki | 26.8                                                          | 57.0                                                 |
| CTF-26  | 24.2                                                          | 51.3                                                 | Nicanite     | 16.8                                                          | 11.4                                                 |

<sup>a</sup>The transmission was calculated as an average of 0.4  $\mu\text{m}$  steps in the range of 4-30 mm.

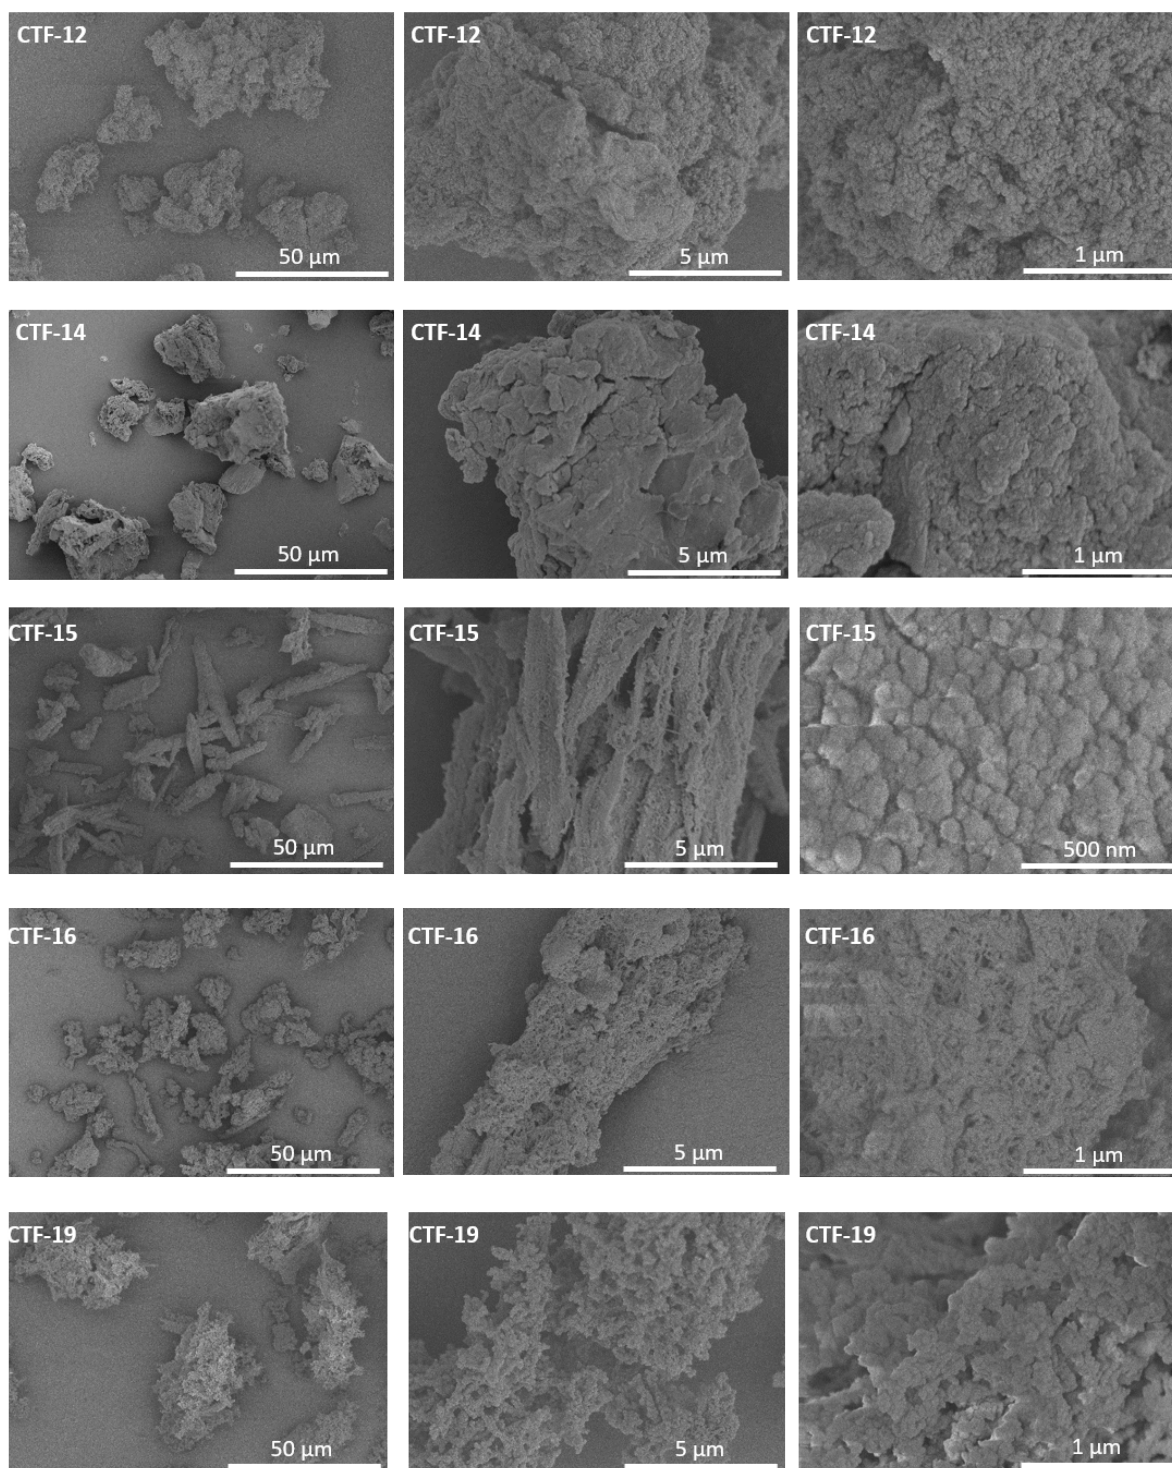

**Figure S-25:** SEM pictures of polymers CTF-12, CTF-14, CTF-15, CTF-16, and CTF-19.

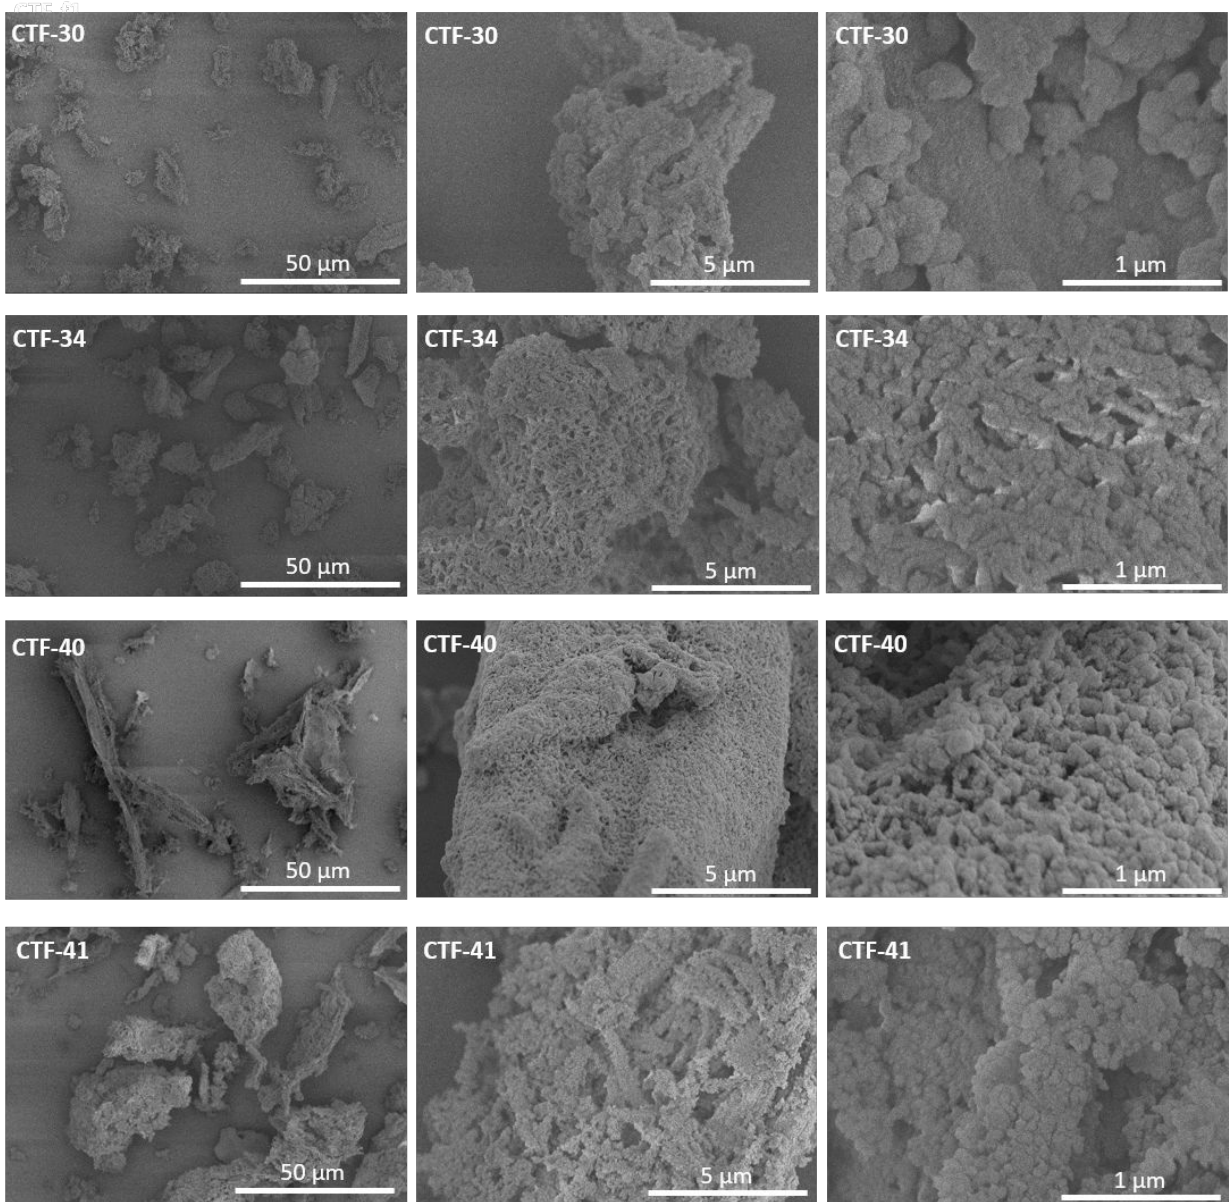

**Figure S-26:** SEM pictures of polymers CTF-30, CTF-34, CTF-40, and CTF-41.

#### 4. Time-Correlated Single Photon Counting Experiments

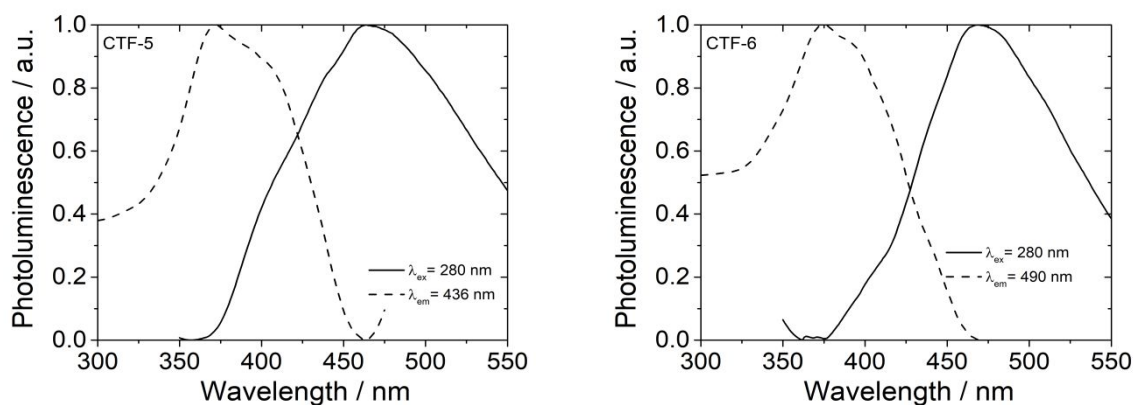

Figure S-27: Excitation and emission photoluminescence spectra of CTF-5 and CTF-6.

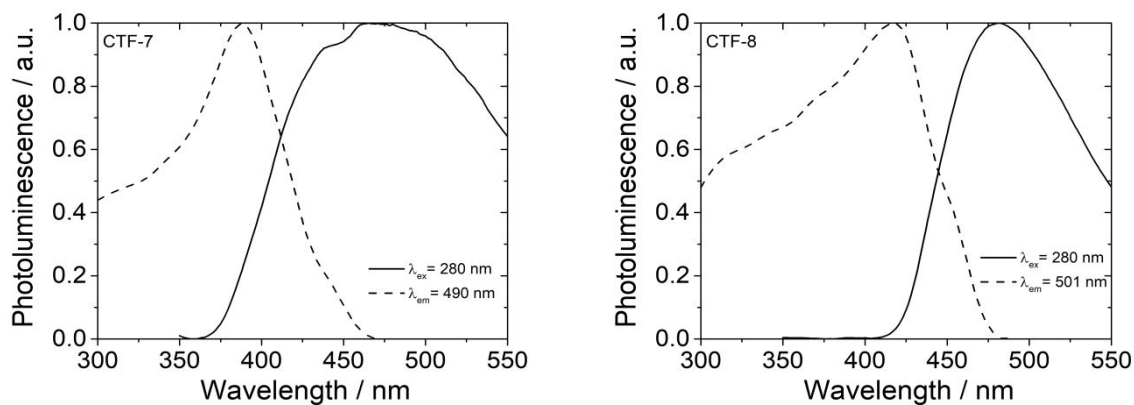

Figure S-28: Excitation and emission photoluminescence spectra of CTF-7 and CTF-8.

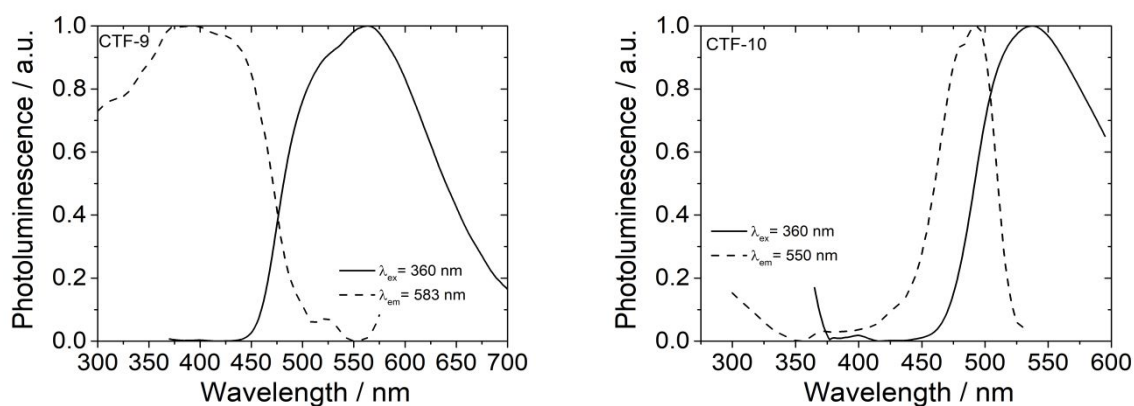

Figure S-29: Excitation and emission photoluminescence spectra of CTF-9 and CTF-10.

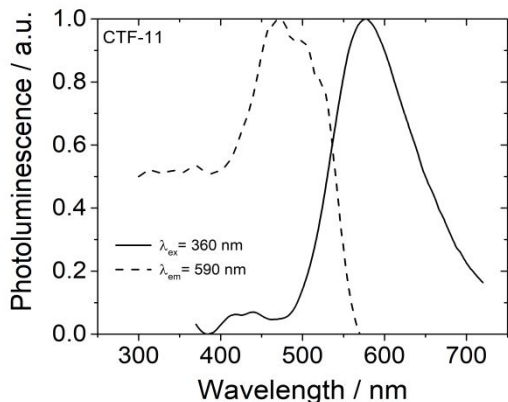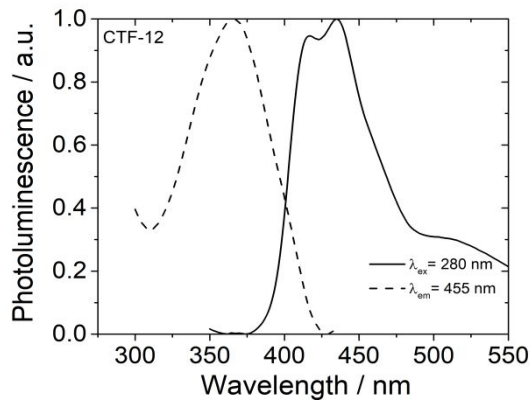

Figure S-30: Excitation and emission photoluminescence spectra of CTF-11 and CTF-12.

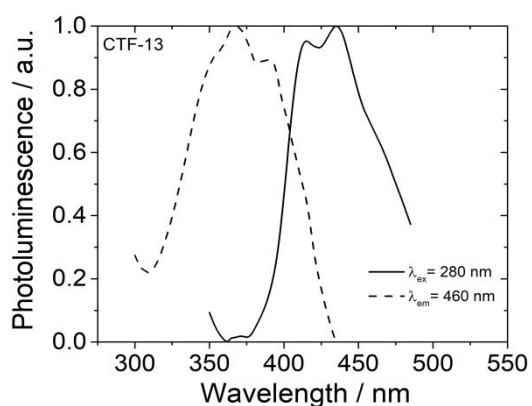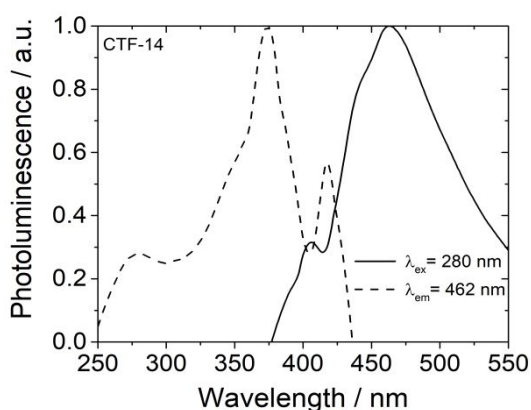

Figure S-31: Excitation and emission photoluminescence spectra of CTF-13 and CTF-14.

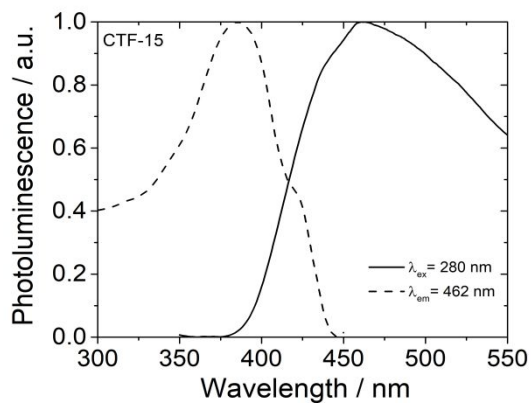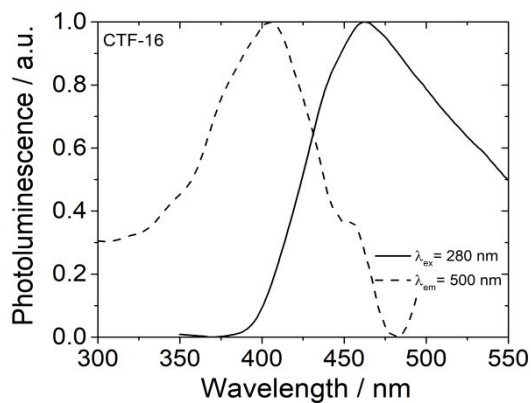

Figure S-32: Excitation and emission photoluminescence spectra of CTF-15 and CTF-16.

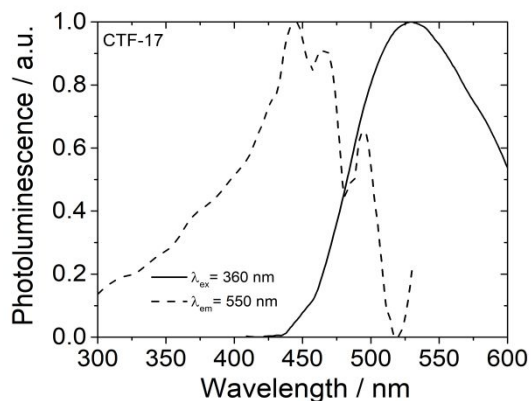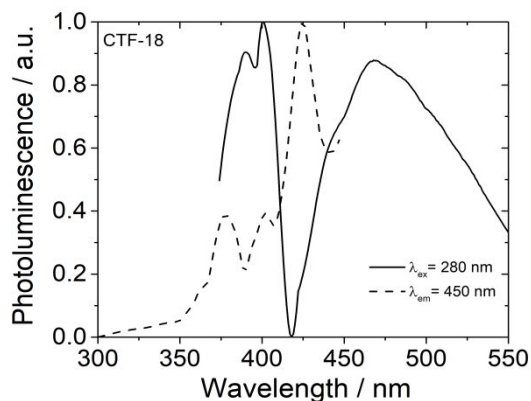

Figure S-33: Excitation and emission photoluminescence spectra of CTF-17 and CTF-18.

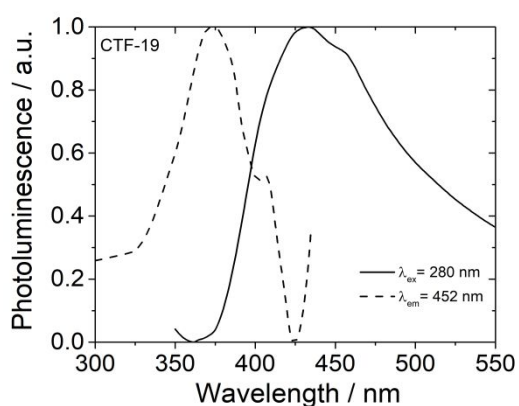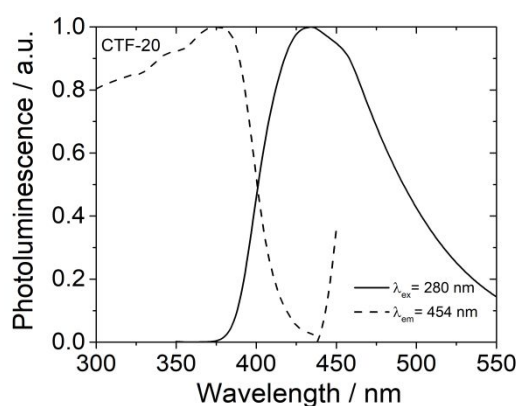

Figure S-34: Excitation and emission photoluminescence spectra of CTF-19 and CTF-20.

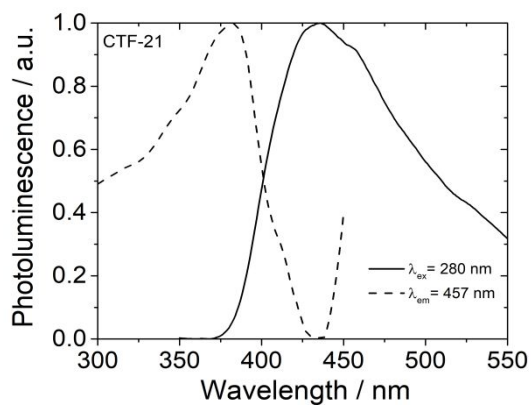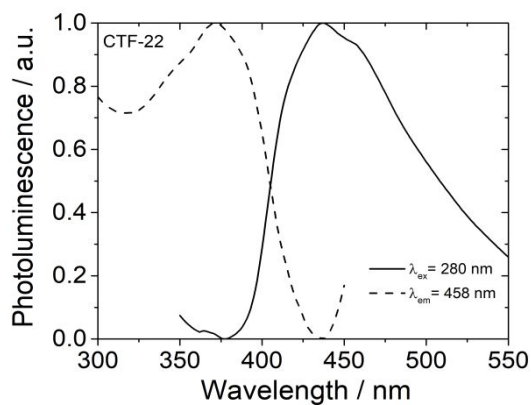

Figure S-35: Excitation and emission photoluminescence spectra of CTF-21 and CTF-22.

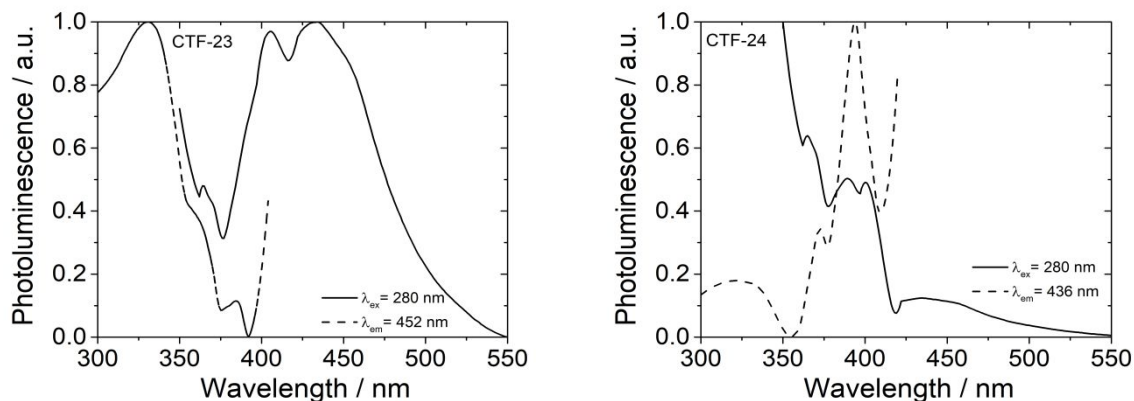

Figure S-36: Excitation and emission photoluminescence spectra of CTF-23 and CTF-24.

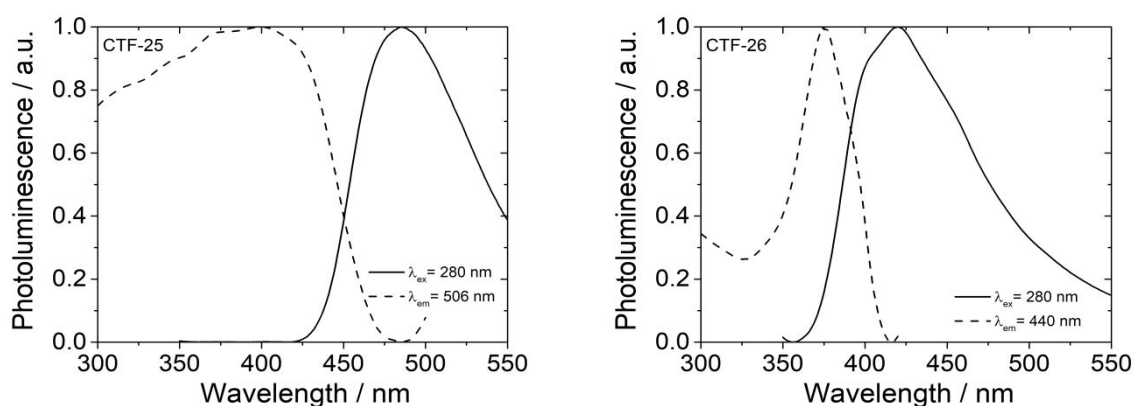

Figure S-37: Excitation and emission photoluminescence spectra of CTF-25 and CTF-26.

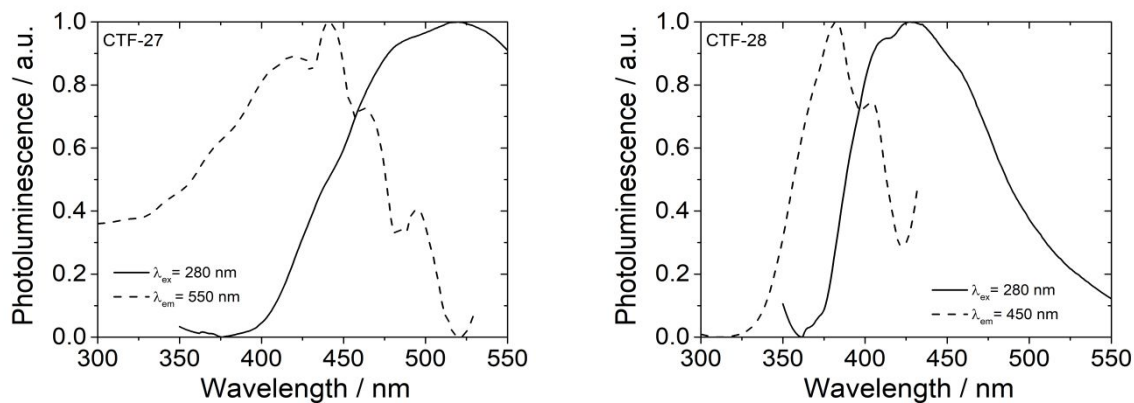

Figure S-38: Excitation and emission photoluminescence spectra of CTF-27 and CTF-28.



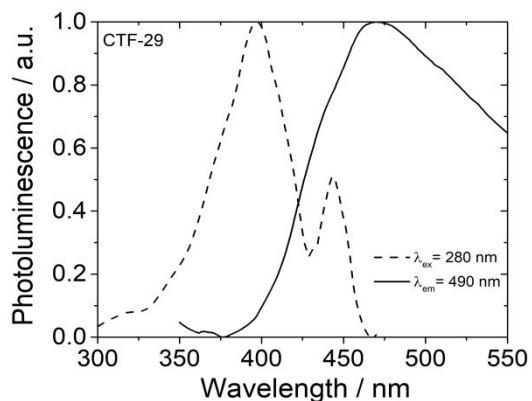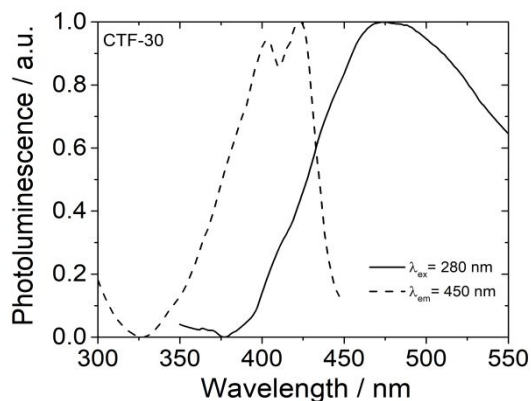

Figure S-39: Excitation and emission photoluminescence spectra of CTF-29 and CTF-30.

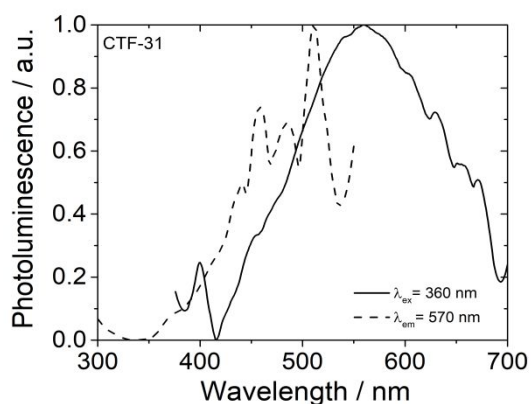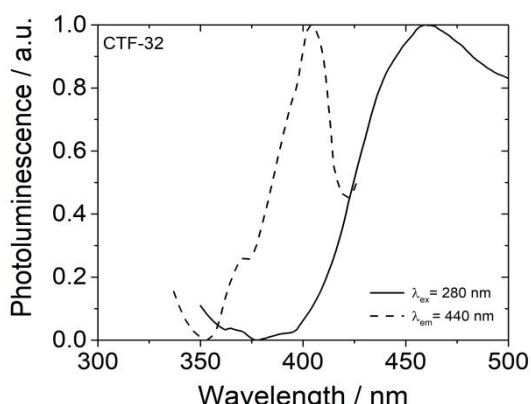

Figure S-40: Excitation and emission photoluminescence spectra of CTF-31 and CTF-32.

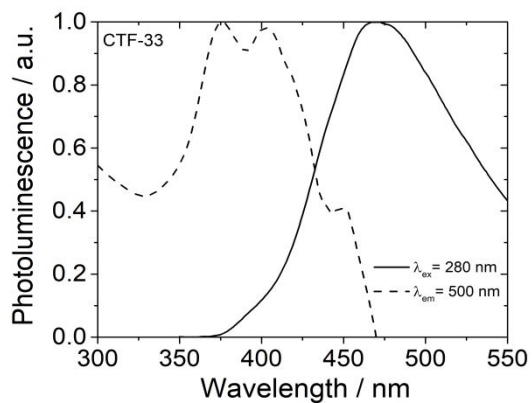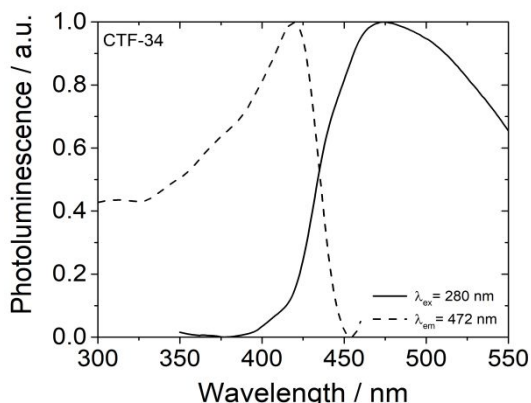

Figure S-41: Excitation and emission photoluminescence spectra of CTF-33 and CTF-34.

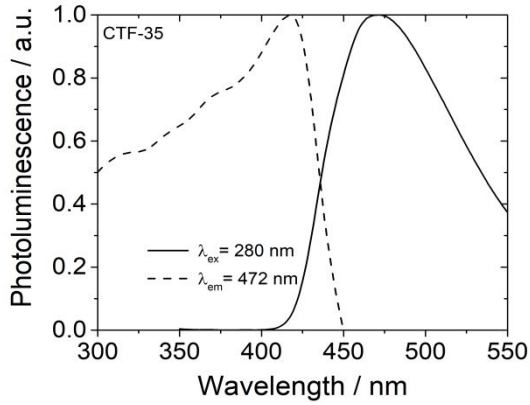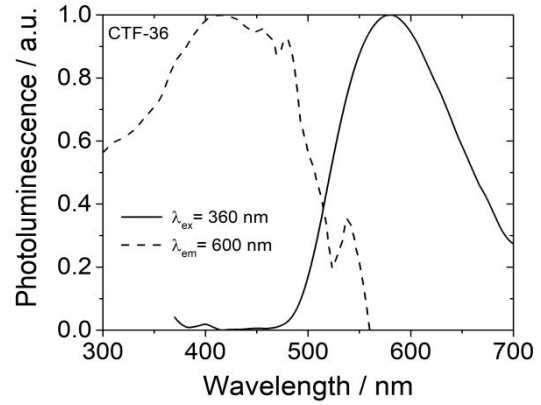

Figure S-42: Excitation and emission photoluminescence spectra of CTF-35 and CTF-36.

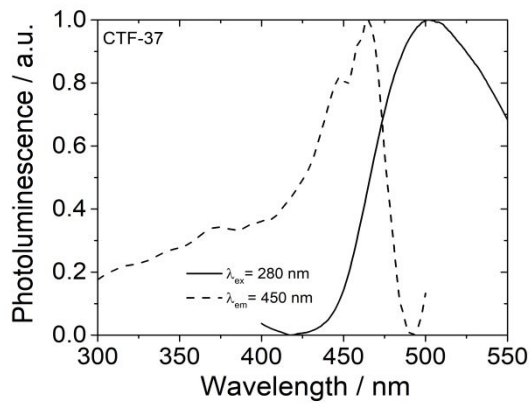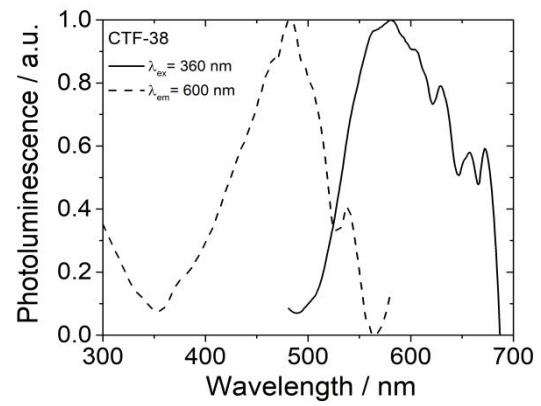

Figure S-43: Excitation and emission photoluminescence spectra of CTF-37 and CTF-38.

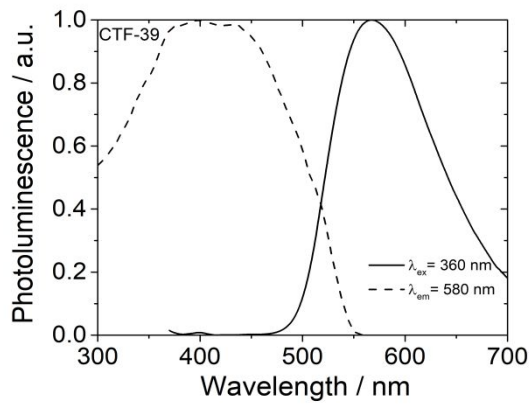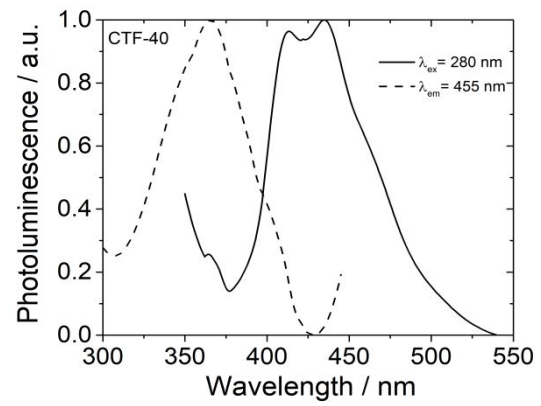

Figure S-44: Excitation and emission photoluminescence spectra of CTF-39 and CTF-40.

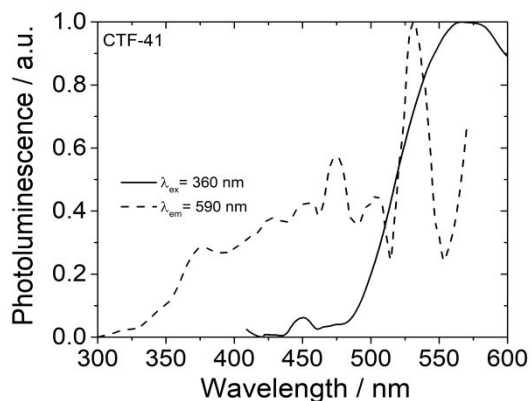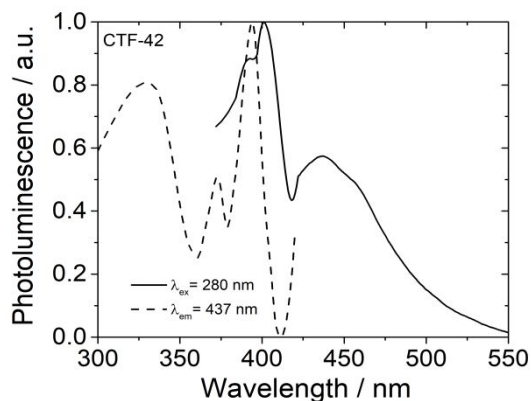

Figure S-45: Excitation and emission photoluminescence spectra of CTF-41 and CTF-42.

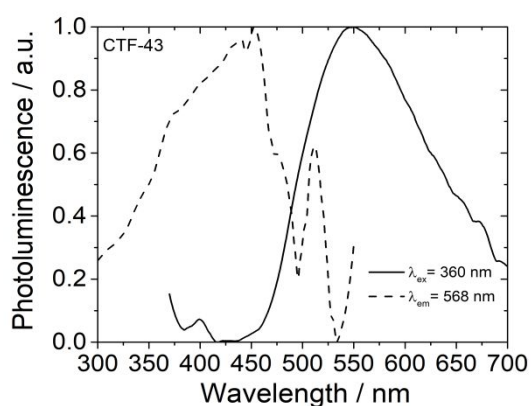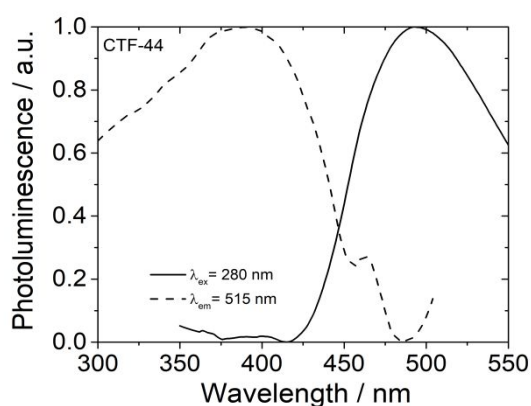

Figure S-46: Excitation and emission photoluminescence spectra of CTF-43 and CTF-44.

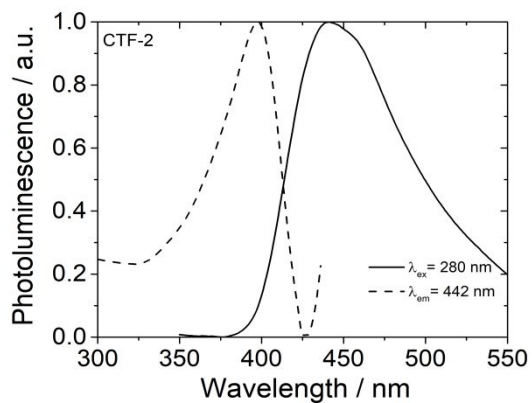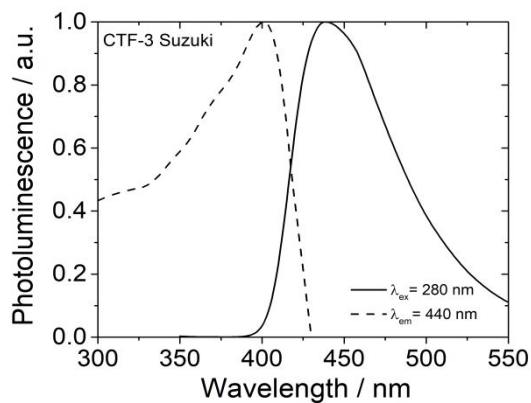

Figure S-47: Excitation and emission photoluminescence spectra of CTF-2 and CTF-3 Suzuki.

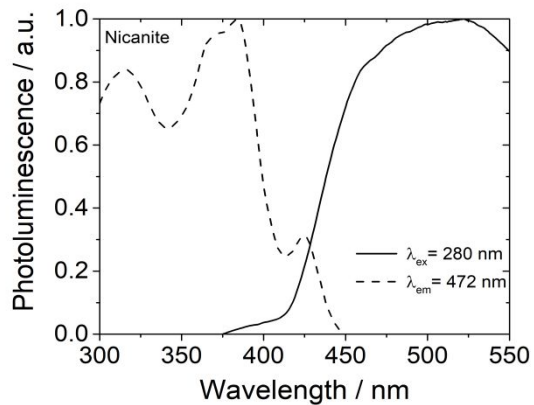

Figure S-48: Excitation and emission photoluminescence spectra of Nicanite.

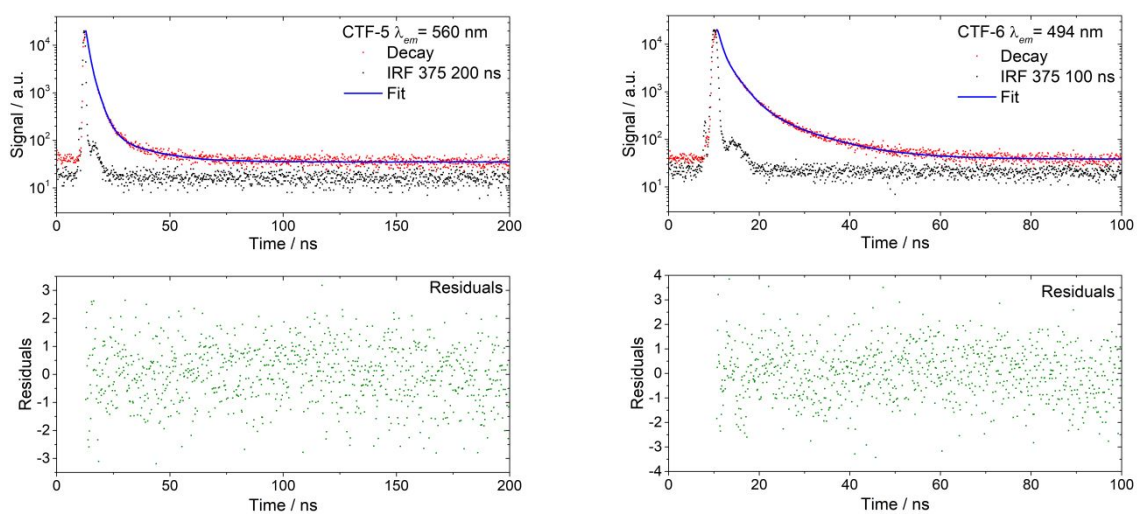

Figure S-49: Time-correlated single-photon counting measurement of CTF-5 and CTF-6 in the solid state.

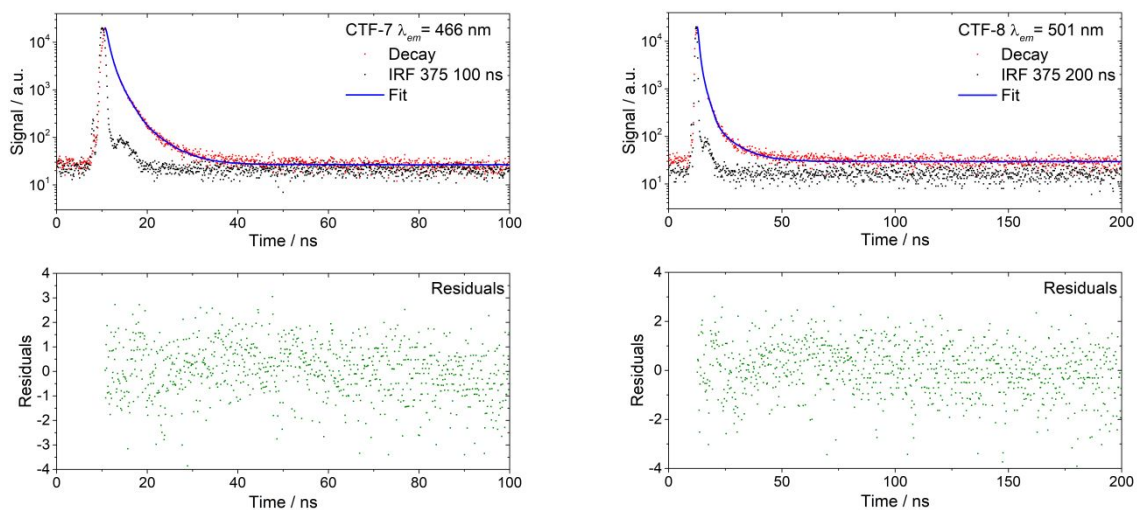

Figure S-50: Time-correlated single-photon counting measurement of CTF-7 and CTF-8 in the solid state.

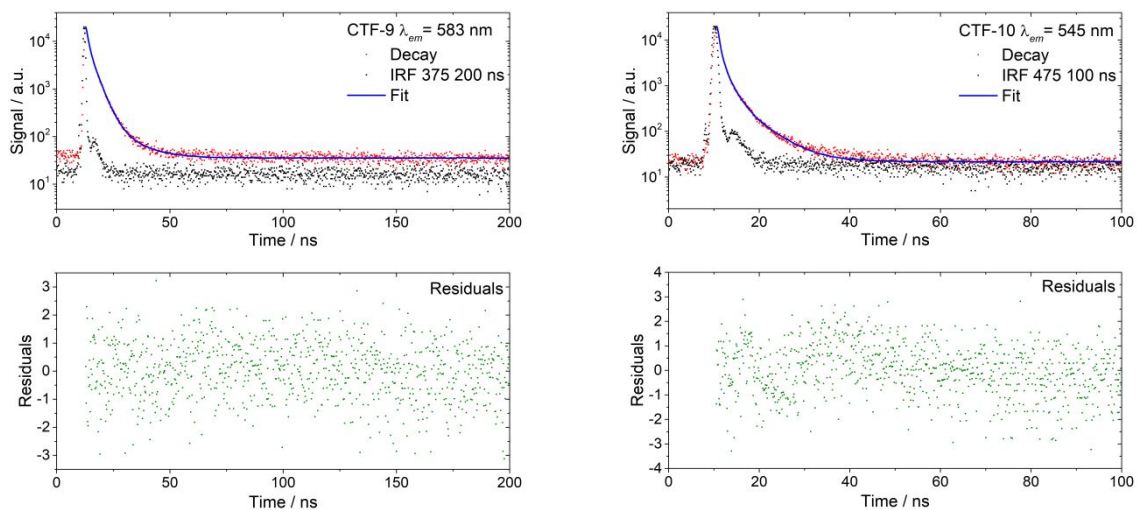

Figure S-51: Time-correlated single-photon counting measurement of CTF-9 and CTF-10 in the solid state.

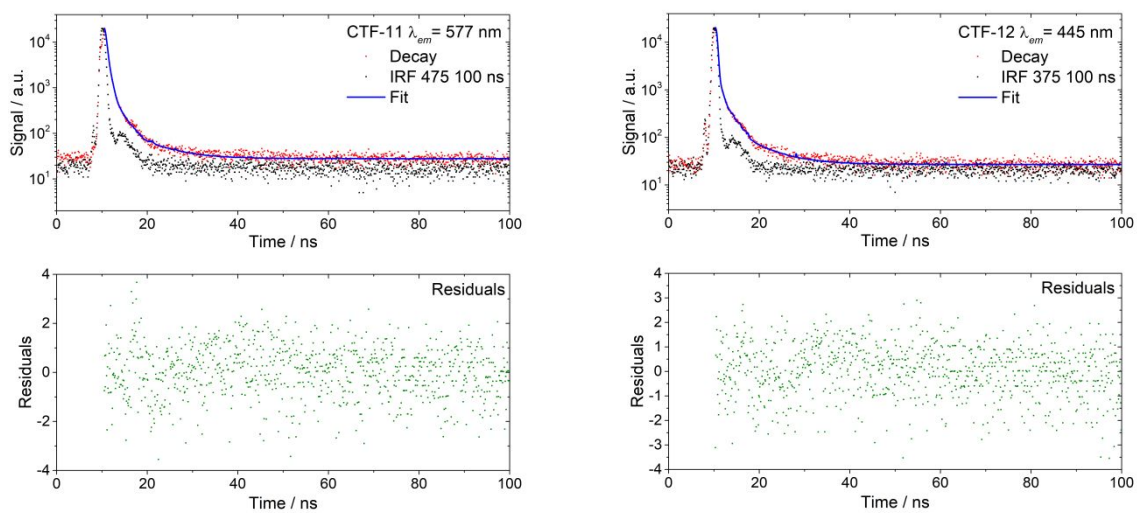

Figure S-52: Time-correlated single-photon counting measurement of CTF-11 and CTF-12 in the solid state.

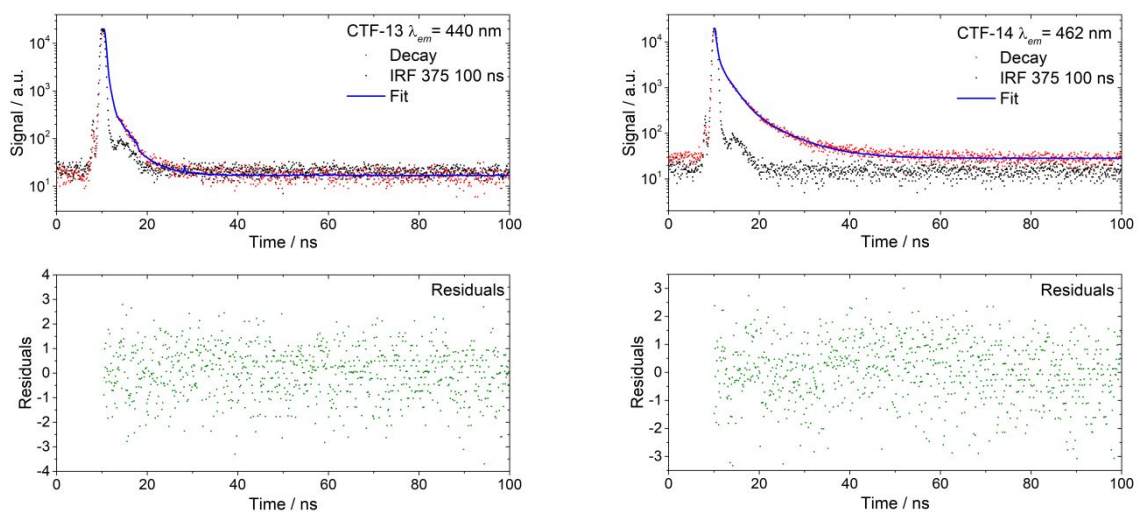

Figure S-53: Time-correlated single-photon counting measurement of CTF-13 and CTF-14 in the solid state.

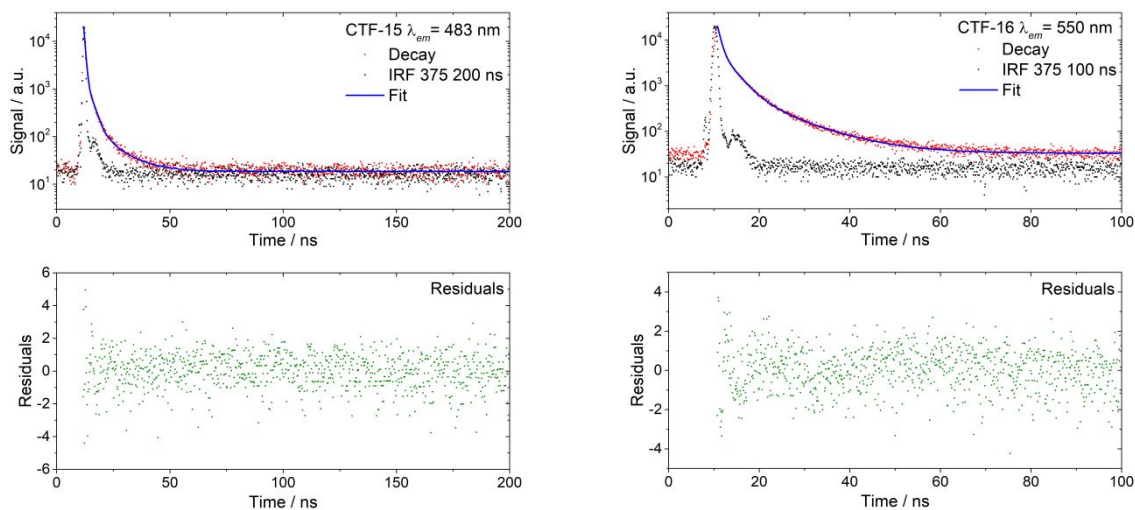

Figure S-54: Time-correlated single-photon counting measurement of CTF-15 and CTF-16 in the solid state.

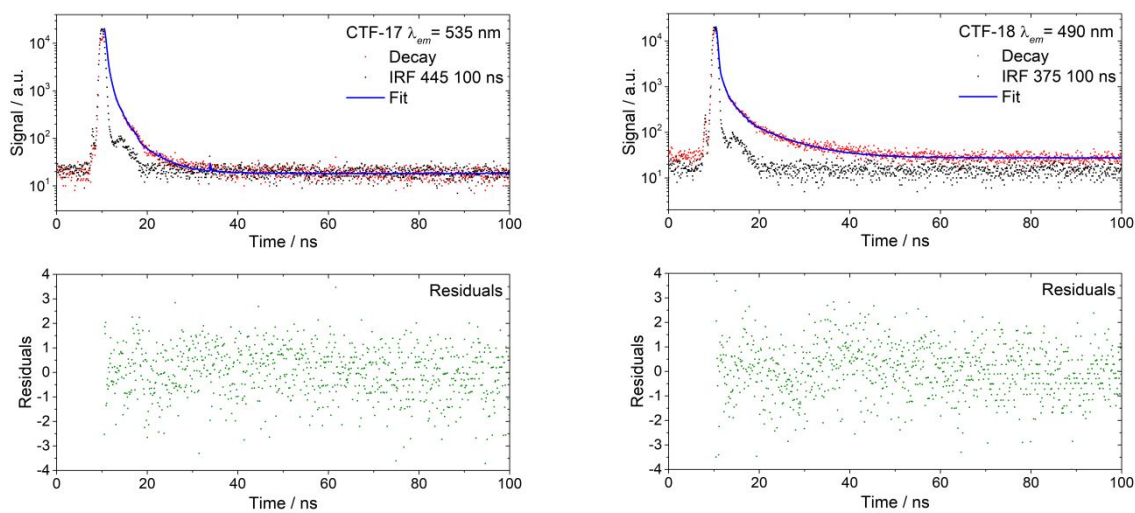

Figure S-55: Time-correlated single-photon counting measurement of CTF-17 and CTF-18 in the solid state.

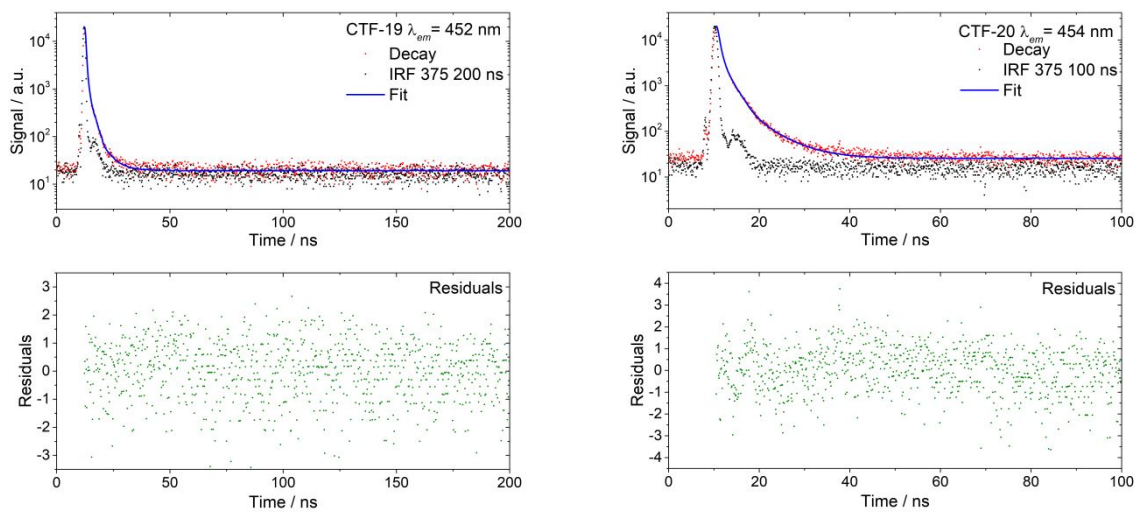

Figure S-56: Time-correlated single-photon counting measurement of CTF-19 and CTF-20 in the solid state.

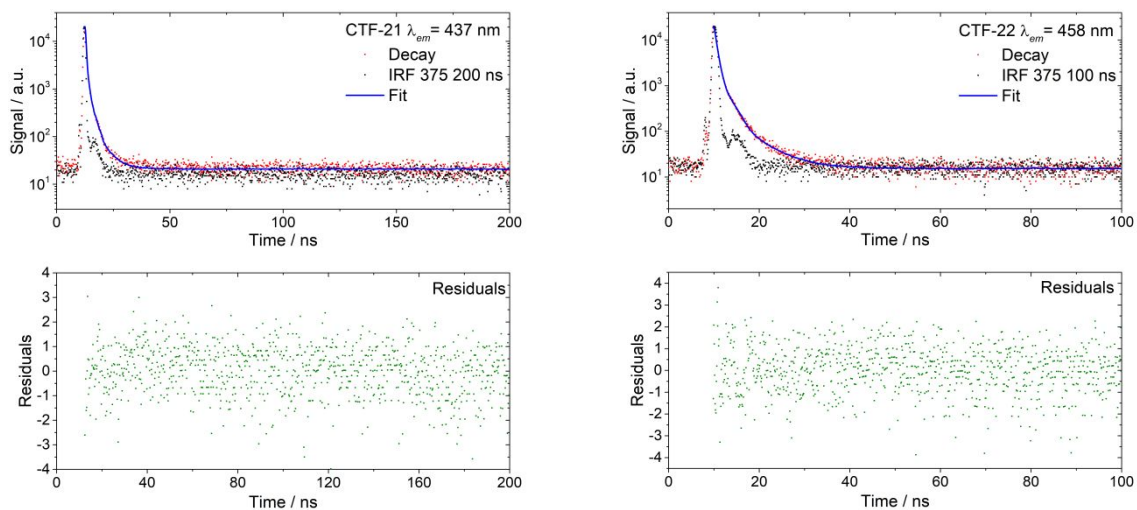

Figure S-57: Time-correlated single-photon counting measurement of CTF-21 and CTF-22 in the solid state.

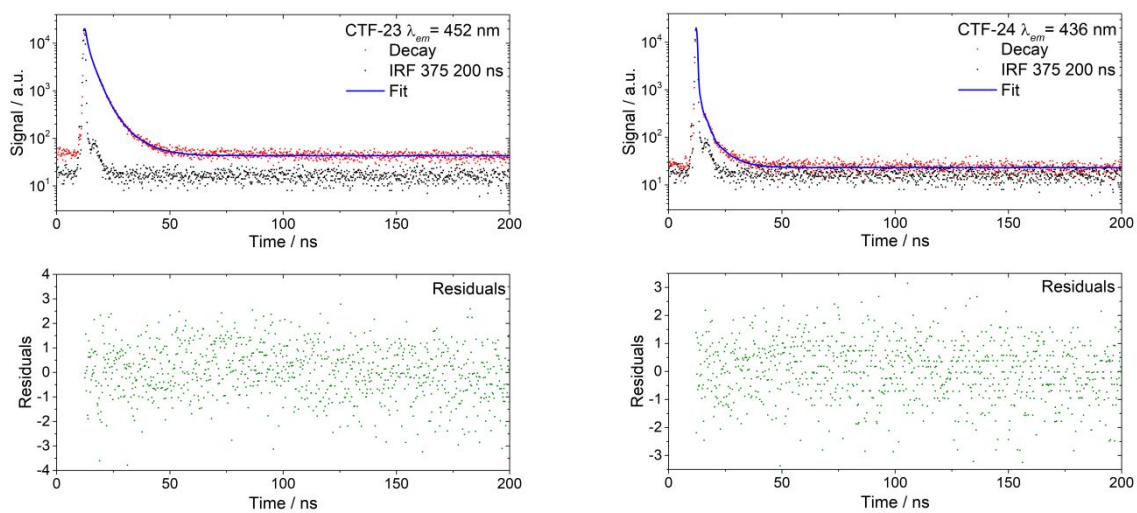

Figure S-58: Time-correlated single-photon counting measurement of CTF-23 and CTF-24 in the solid state.

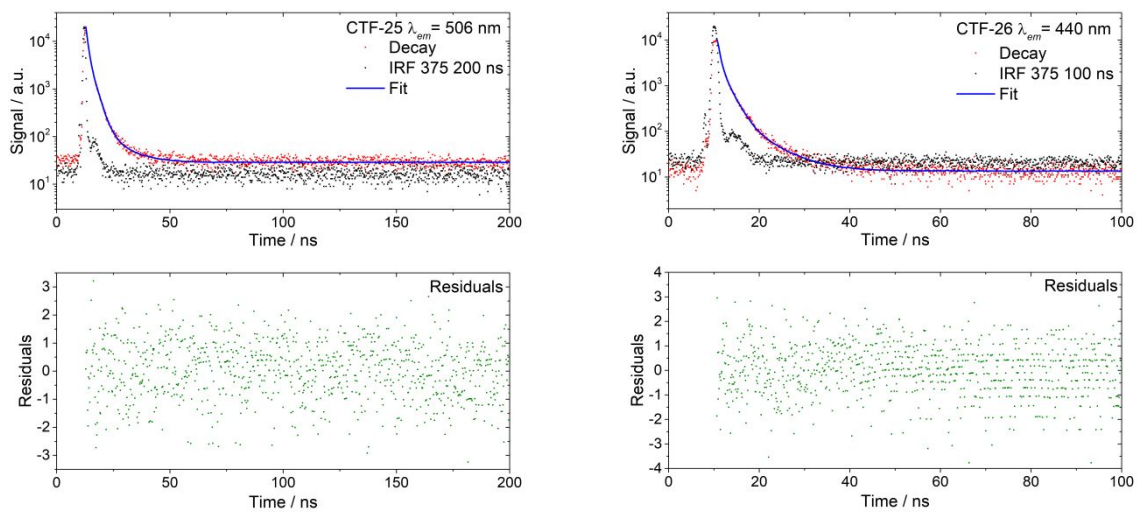

Figure S-59: Time-correlated single-photon counting measurement of CTF-25 and CTF-26 in the solid state.

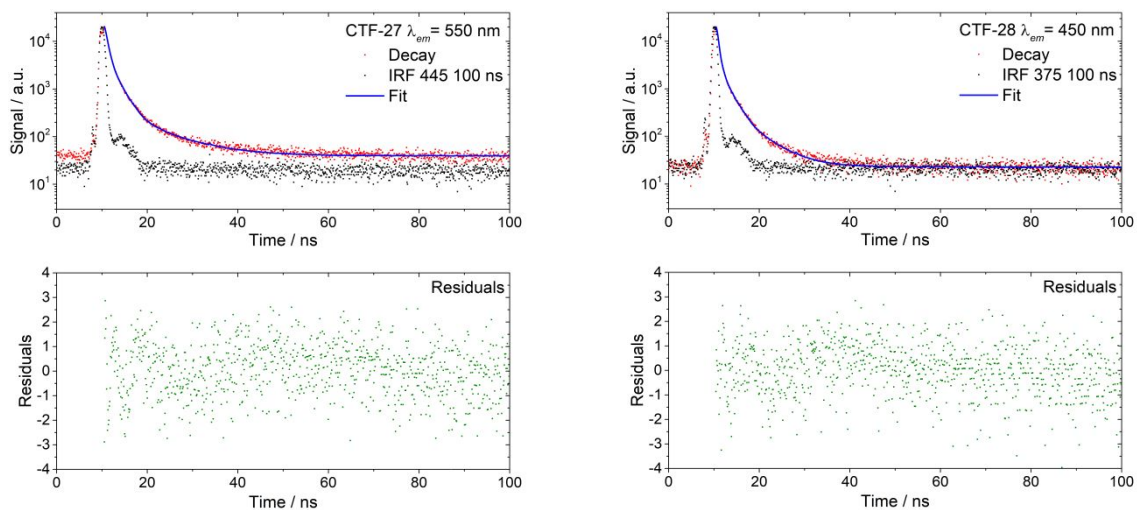

Figure S-60: Time-correlated single-photon counting measurement of CTF-27 and CTF-28 in the solid state.

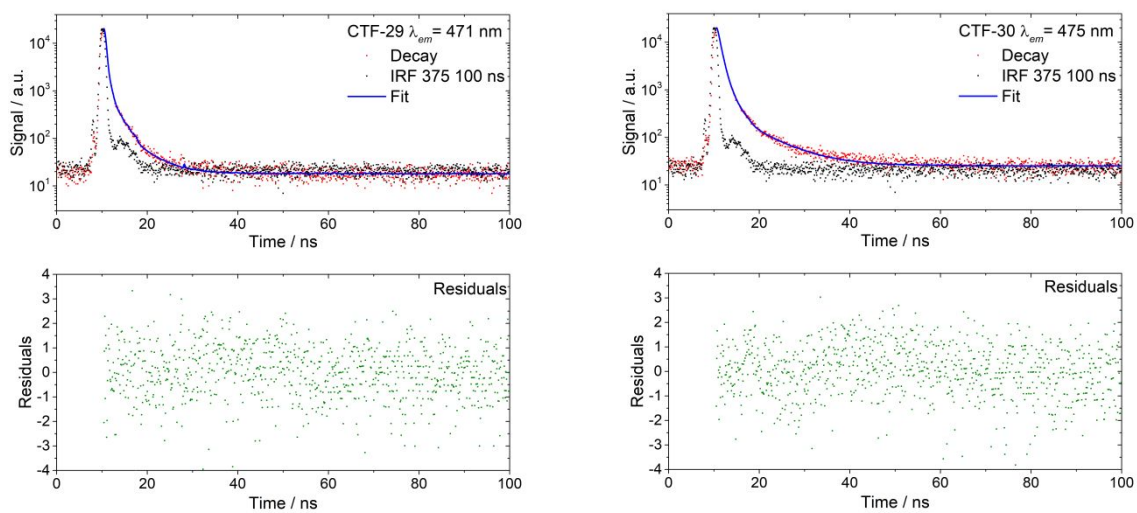

Figure S-61: Time-correlated single-photon counting measurement of CTF-29 and CTF-30 in the solid state.

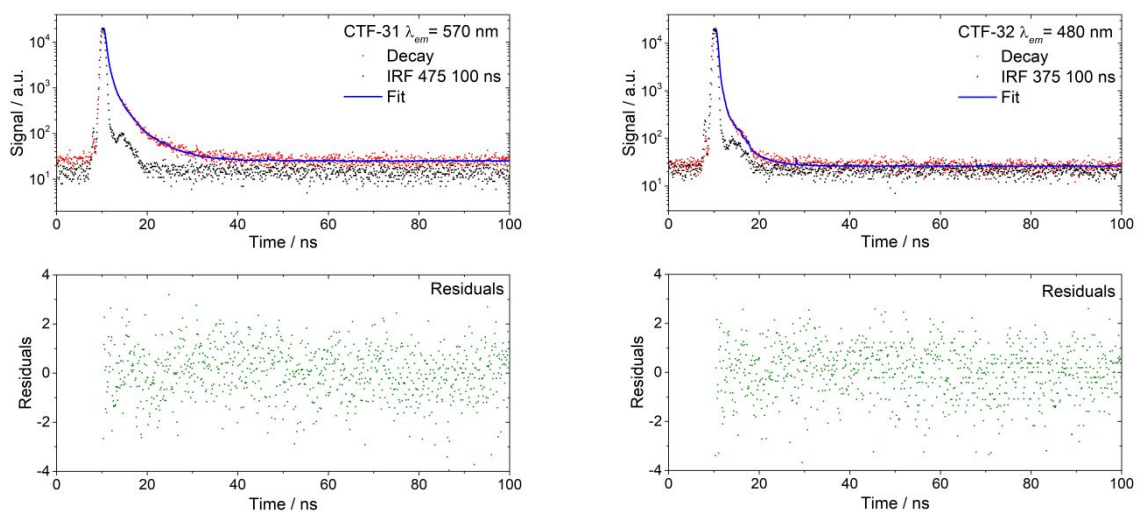

Figure S-62: Time-correlated single-photon counting measurement of CTF-31 and CTF-32 in the solid state.



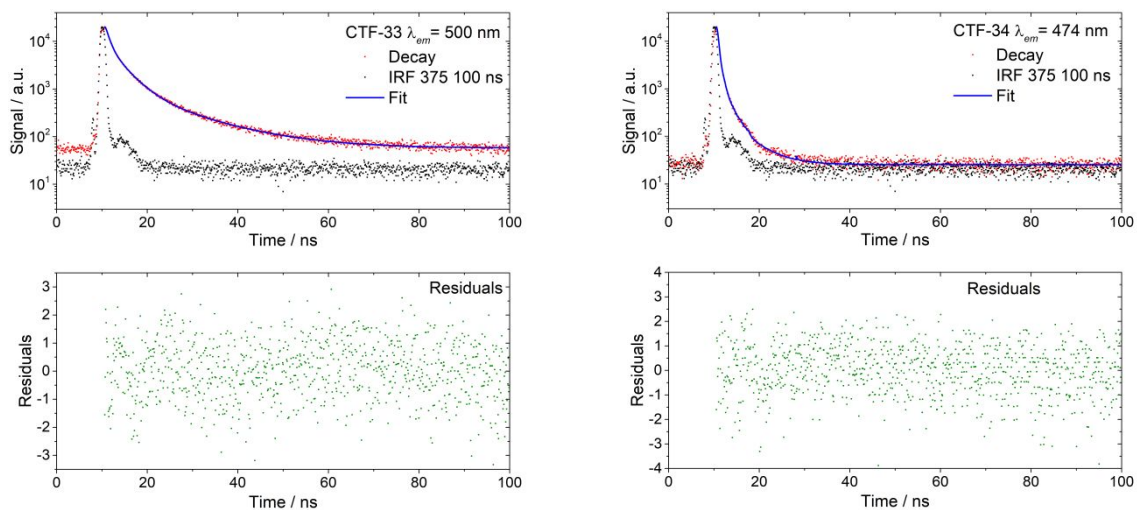

Figure S-63: Time-correlated single-photon counting measurement of CTF-33 and CTF-34 in the solid state.

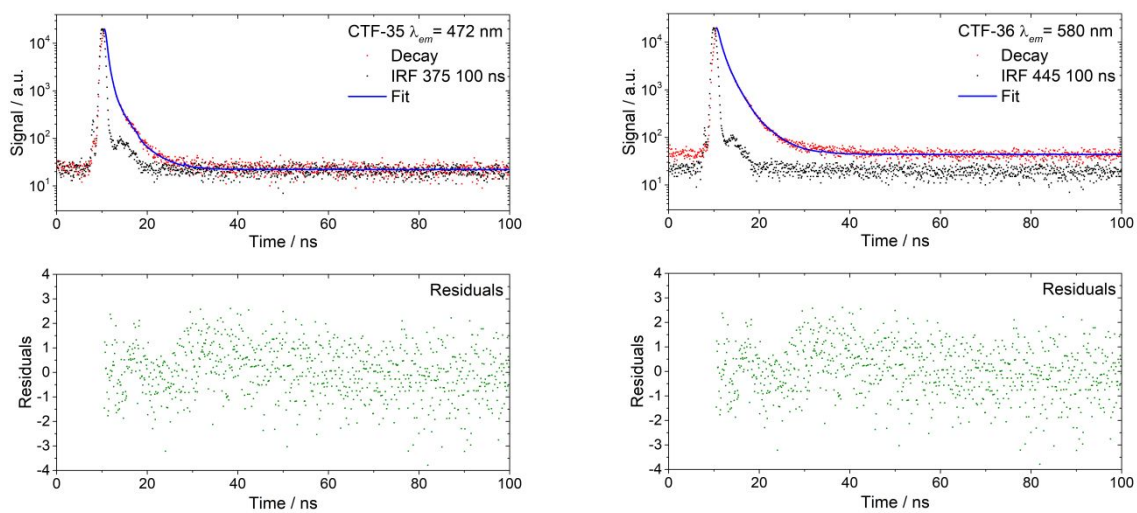

Figure S-64: Time-correlated single-photon counting measurement of CTF-35 and CTF-36 in the solid state.

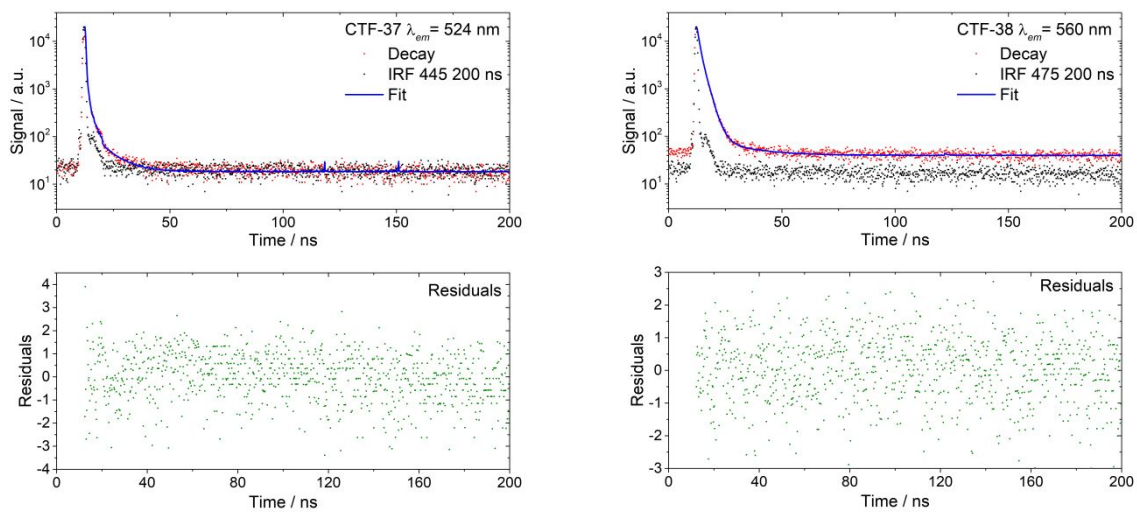

Figure S-65: Time-correlated single-photon counting measurement of CTF-37 and CTF-38 in the solid state.

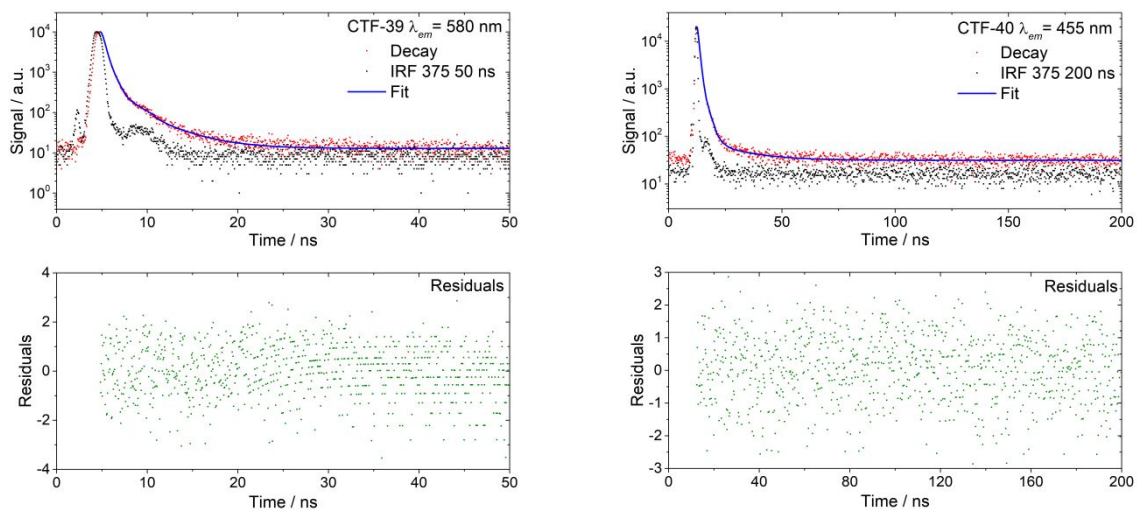

Figure S-66: Time-correlated single-photon counting measurement of CTF-39 and CTF-40 in the solid state.

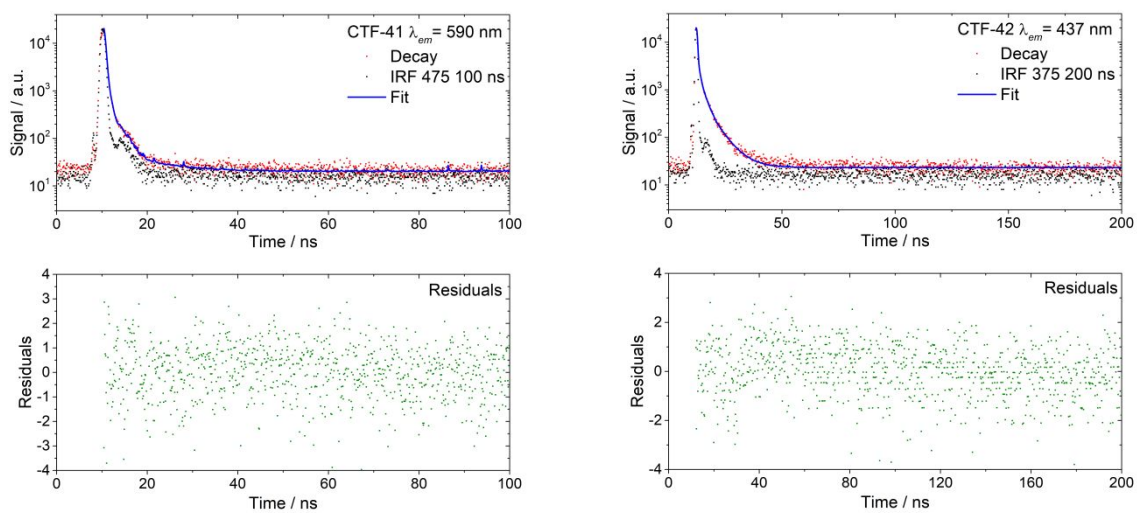

Figure S-67: Time-correlated single-photon counting measurement of CTF-41 and CTF-42 in the solid state.

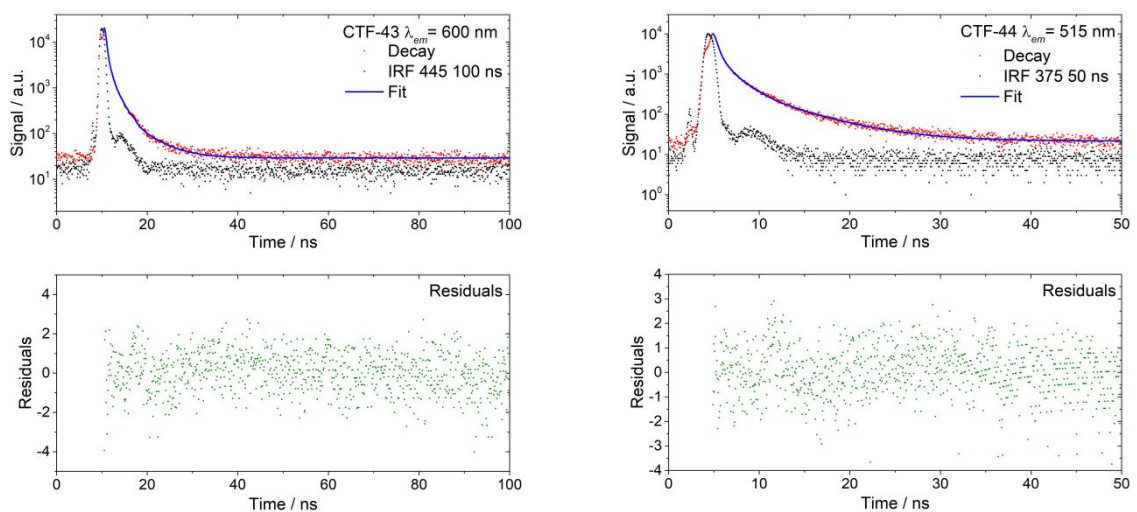

Figure S-68: Time-correlated single-photon counting measurement of CTF-43 and CTF-44 in the solid state.

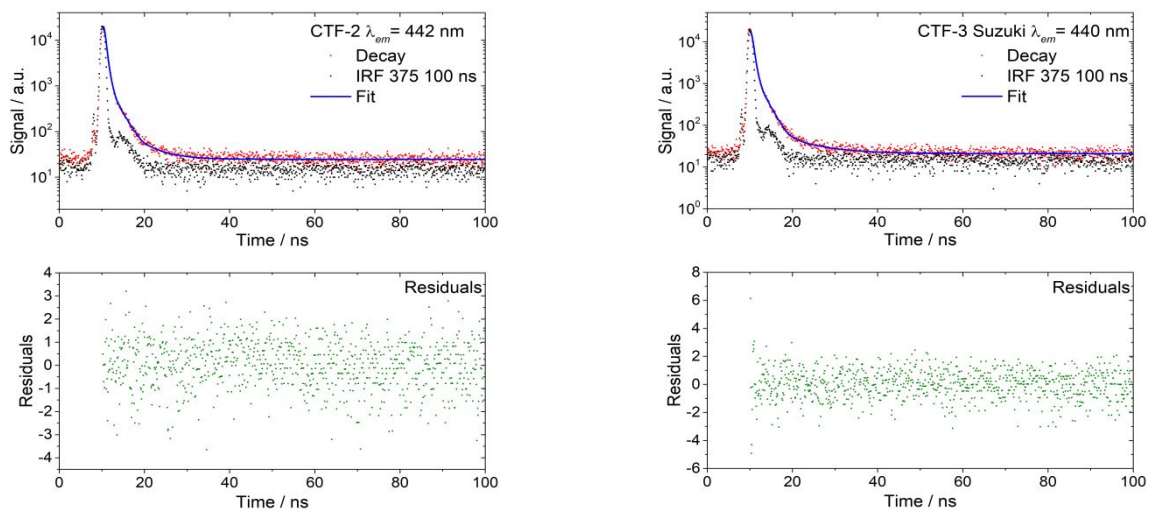

**Figure S-69:** Time-correlated single-photon counting measurement of CTF-2 and CTF-3 Suzuki in the solid state.

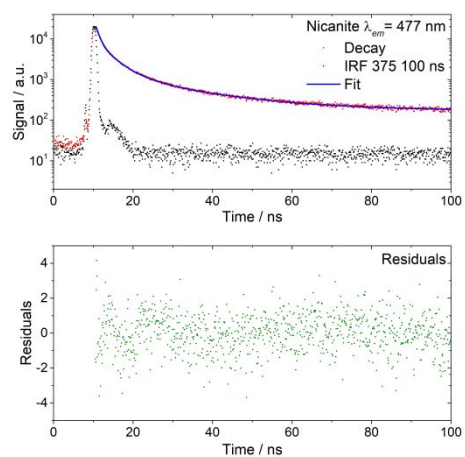

**Figure S-70:** Time-correlated single-photon counting measurement of Nicanite in the solid state.

**Table S-5:** Time-correlated single-photon counting results.

| Polymer | $\lambda_{\text{excitation}}$<br>/ nm | $\lambda_{\text{emission}}$<br>/ nm | $\tau_1$<br>/ ns | $\tau_2$<br>/ ns | $\tau_3$<br>/ ns | $\chi^2$ | B1<br>/ % | B2<br>/ % | B3<br>/ % | $\tau_{\text{avg}}^a$<br>/ ns |
|---------|---------------------------------------|-------------------------------------|------------------|------------------|------------------|----------|-----------|-----------|-----------|-------------------------------|
| CTF-5   | 375                                   | 560                                 | 1.142            | 2.872            | 15.488           | 1.047    | 61.861    | 33.881    | 4.259     | 2.339                         |
| CTF-6   | 375                                   | 494                                 | 0.758            | 2.666            | 10.251           | 1.146    | 40.822    | 45.382    | 13.797    | 2.934                         |
| CTF-7   | 375                                   | 466                                 | 0.491            | 1.427            | 4.662            | 1.194    | 40.809    | 48.093    | 11.098    | 1.404                         |
| CTF-8   | 375                                   | 501                                 | 0.518            | 1.72             | 8.198            | 1.134    | 57.54     | 36.433    | 6.027     | 1.419                         |
| CTF-9   | 375                                   | 583                                 | 1.007            | 3.206            | 10.313           | 1.029    | 41.277    | 53.324    | 5.399     | 2.682                         |
| CTF-10  | 475                                   | 545                                 | 0.231            | 1.199            | 5.125            | 1.154    | 49.96     | 38.225    | 11.815    | 1.179                         |
| CTF-11  | 475                                   | 577                                 | 0.2              | 0.83             | 6.478            | 1.131    | 65.882    | 31.045    | 3.073     | 0.589                         |
| CTF-12  | 375                                   | 445                                 | 0.08             | 1.163            | 6.289            | 1.152    | 90.531    | 6.96      | 2.509     | 0.311                         |
| CTF-13  | 375                                   | 440                                 | 0.134            | 0.734            | 3.984            | 1.138    | 81.106    | 16.192    | 2.702     | 0.335                         |
| CTF-14  | 375                                   | 462                                 | 0.31             | 2.086            | 7.258            | 1.2      | 59.405    | 29.232    | 11.362    | 1.619                         |
| CTF-15  | 375                                   | 483                                 | 0.586            | 2.371            | 9.478            | 1.205    | 82.092    | 13.292    | 4.615     | 1.234                         |
| CTF-16  | 375                                   | 550                                 | 0.674            | 2.852            | 10.19            | 1.198    | 47.665    | 36.278    | 16.057    | 2.992                         |
| CTF-17  | 445                                   | 535                                 | 0.166            | 0.963            | 4.734            | 1.026    | 74.296    | 22.161    | 3.543     | 0.504                         |
| CTF-18  | 375                                   | 490                                 | 0.089            | 1.219            | 8.032            | 1.141    | 84.437    | 10.441    | 5.123     | 0.614                         |
| CTF-19  | 375                                   | 452                                 | 0.308            | 1.189            | 4.678            | 1.102    | 80.045    | 16.781    | 3.174     | 0.595                         |
| CTF-20  | 375                                   | 454                                 | 0.428            | 1.682            | 5.757            | 1.137    | 54.383    | 35.59     | 10.027    | 1.409                         |
| CTF-21  | 375                                   | 437                                 | 0.203            | 1.061            | 4.583            | 1.031    | 78.261    | 18.448    | 3.291     | 0.505                         |
| CTF-22  | 375                                   | 458                                 | 0.514            | 1.455            | 5.445            | 1.158    | 75.201    | 19.805    | 4.994     | 0.947                         |
| CTF-23  | 375                                   | 452                                 | 0.764            | 2.986            | 7.853            | 1.108    | 30.179    | 55.907    | 13.914    | 2.993                         |
| CTF-24  | 375                                   | 436                                 | 0.116            | 1.198            | 6.123            | 1.077    | 92.702    | 4.844     | 2.454     | 0.316                         |
| CTF-25  | 375                                   | 506                                 | 0.818            | 2.36             | 8.583            | 1.044    | 57.462    | 38.87     | 3.669     | 1.702                         |
| CTF-26  | 375                                   | 440                                 | 0.381            | 1.589            | 5.803            | 1.132    | 46.557    | 43.92     | 9.523     | 1.428                         |
| CTF-27  | 445                                   | 550                                 | 0.554            | 1.823            | 8.817            | 1.174    | 58.242    | 34.21     | 7.548     | 1.612                         |
| CTF-28  | 375                                   | 450                                 | 0.324            | 1.393            | 5.196            | 1.111    | 63.916    | 27.236    | 8.848     | 1.046                         |
| CTF-29  | 375                                   | 471                                 | 0.189            | 0.911            | 4.685            | 1.192    | 77.384    | 18.891    | 3.725     | 0.493                         |
| CTF-30  | 375                                   | 475                                 | 0.529            | 1.148            | 7.222            | 1.181    | 37.359    | 55.259    | 7.382     | 1.365                         |
| CTF-31  | 475                                   | 570                                 | 0.211            | 1.003            | 4.888            | 1.159    | 63.86     | 29.03     | 7.11      | 0.773                         |
| CTF-32  | 375                                   | 480                                 | 0.11             | 0.764            | 3.773            | 1.14     | 83.953    | 13.943    | 2.104     | 0.278                         |
| CTF-33  | 375                                   | 500                                 | 0.928            | 3.43             | 12.742           | 1.054    | 37.448    | 42.437    | 20.115    | 4.366                         |
| CTF-34  | 375                                   | 474                                 | 0.191            | 0.948            | 4.618            | 1.06     | 68.385    | 27.272    | 4.342     | 0.59                          |
| CTF-35  | 375                                   | 472                                 | 0.25             | 0.894            | 3.693            | 1.194    | 62.148    | 31.625    | 6.227     | 0.668                         |

[a] Fluorescence life-times for all polymers obtained from fitting time-correlated single photon counting decays to a sum of three exponentials, which yield  $\tau_1$ ,  $\tau_2$ , and  $\tau_3$  according to  $\sum_{i=1}^n (A + B_i \exp(-t/\tau_i))$ .  $\tau_{\text{AVG}}$  is the weighted average lifetime calculated as  $\sum_{i=1}^n B_i \tau_i$ .

**Table S-6:** Time-correlated single-photon counting results.

| Polymer                 | $\lambda_{\text{excitation}}$<br>/ nm | $\lambda_{\text{emission}}$<br>/ nm | $\tau_1$<br>/ ns | $\tau_2$<br>/ ns | $\tau_3$<br>/ ns | $\chi^2$ | B1<br>/ % | B2<br>/ % | B3<br>/ % | $\tau_{\text{avg}}^a$<br>/ ns |
|-------------------------|---------------------------------------|-------------------------------------|------------------|------------------|------------------|----------|-----------|-----------|-----------|-------------------------------|
| <b>CTF-35</b>           | 375                                   | 472                                 | 0.25             | 0.894            | 3.693            | 1.194    | 62.148    | 31.625    | 6.227     | 0.668                         |
| <b>CTF-36</b>           | 445                                   | 580                                 | 0.389            | 1.419            | 3.917            | 1.126    | 26.29     | 56.652    | 17.057    | 1.574                         |
| <b>CTF-37</b>           | 445                                   | 524                                 | 0.048            | 0.939            | 7.663            | 1.149    | 98.253    | 1.444     | 0.303     | 0.084                         |
| <b>CTF-38</b>           | 475                                   | 560                                 | 1.019            | 2.377            | 15.791           | 1.044    | 46.548    | 51.536    | 1.916     | 2.002                         |
| <b>CTF-39</b>           | 375                                   | 580                                 | 0.271            | 0.737            | 3.762            | 1.206    | 52.775    | 40.395    | 6.83      | 0.698                         |
| <b>CTF-40</b>           | 375                                   | 455                                 | 0.814            | 2.299            | 15.847           | 1.154    | 85.442    | 12.382    | 2.176     | 1.325                         |
| <b>CTF-41</b>           | 475                                   | 590                                 | 0.172            | 0.782            | 7.348            | 1.205    | 86.567    | 12.441    | 0.992     | 0.319                         |
| <b>CTF-42</b>           | 375                                   | 437                                 | 0.152            | 1.341            | 5.647            | 1.165    | 74.744    | 15.562    | 9.695     | 0.87                          |
| <b>CTF-43</b>           | 445                                   | 600                                 | 0.191            | 1.131            | 4.875            | 1.145    | 67.309    | 26.732    | 5.959     | 0.721                         |
| <b>CTF-44</b>           | 375                                   | 515                                 | 0.307            | 1.394            | 5.686            | 1.095    | 49.69     | 32.689    | 17.62     | 1.61                          |
| <b>CTF-2</b>            | 375                                   | 442                                 | 0.953            | 4.042            | 19.018           | 1.153    | 31.375    | 37.636    | 30.989    | 7.714                         |
| <b>CTF-3<br/>Suzuki</b> | 375                                   | 440                                 | 0.444            | 1.511            | 7.669            | 1.128    | 75.605    | 21.982    | 2.413     | 0.444                         |
| <b>Nicanite</b>         | 375                                   | 477                                 | 0.379            | 1.140            | 4.785            | 1.110    | 75.717    | 21.019    | 3.264     | 0.683                         |

[a] Fluorescence life-times for all polymers obtained from fitting time-correlated single photon counting decays to a sum of three exponentials, which yield  $\tau_1$ ,  $\tau_2$ , and  $\tau_3$  according to  $\sum_{i=1}^n (A + B_i \exp(-t/\tau_i))$ .  $\tau_{\text{AVG}}$  is the weighted average lifetime calculated as  $\sum_{i=1}^n B_i \tau_i$ .

## 5. Hydrogen evolution of polymers

**Table S-7:** Overview of the hydrogen evolution rates for illumination  $\lambda > 420$  nm and measured area on the high-throughput gas chromatograph.

| Sample   | H <sub>2</sub> Evolved / $\mu\text{mol g}^{-1} \text{h}^{-1}$<br>for Xe-lamp $\lambda > 420$ nm <sup>1</sup> | H <sub>2</sub> Evolved / a.u.<br>for the solar simulator (HT) <sup>2</sup> | H <sub>2</sub> Evolved / $\mu\text{mol g}^{-1} \text{h}^{-1}$ for<br>the solar simulator on the HT-<br>setup <sup>3</sup> |
|----------|--------------------------------------------------------------------------------------------------------------|----------------------------------------------------------------------------|---------------------------------------------------------------------------------------------------------------------------|
| CTF-5    | 20 ± 2                                                                                                       | 663066 ± 83700                                                             | 1023 ± 129                                                                                                                |
| CTF-6    | 8 ± 1                                                                                                        | 264636 ± 83700                                                             | 408 ± 129                                                                                                                 |
| CTF-7    | 20 ± 6                                                                                                       | 366196 ± 83700                                                             | 565 ± 129                                                                                                                 |
| CTF-8    | 371 ± 39                                                                                                     | 787848 ± 83700                                                             | 1215 ± 129                                                                                                                |
| CTF-9    | 63 ± 3                                                                                                       | 521594 ± 83700                                                             | 805 ± 129                                                                                                                 |
| CTF-10   | 1412 ± 63                                                                                                    | 1879770 ± 37429                                                            | 2900 ± 58                                                                                                                 |
| CTF-11   | 1151 ± 29                                                                                                    | 1203520 ± 37429                                                            | 1857 ± 58                                                                                                                 |
| CTF-12   | 1515 ± 66                                                                                                    | 1307910 ± 37429                                                            | 2018 ± 58                                                                                                                 |
| CTF-13   | 72 ± 3                                                                                                       | 256851 ± 83700                                                             | 396 ± 129                                                                                                                 |
| CTF-14   | 16 ± 2                                                                                                       | 158550 ± 83700                                                             | 245 ± 129                                                                                                                 |
| CTF-15   | 2946 ± 381                                                                                                   | 2236820 ± 19003                                                            | 3451 ± 31                                                                                                                 |
| CTF-16   | 1354 ± 133                                                                                                   | 913453 ± 37429                                                             | 1409 ± 58                                                                                                                 |
| CTF-17   | 537 ± 30                                                                                                     | 711724 ± 83700                                                             | 1098 ± 129                                                                                                                |
| CTF-18   | 5 ± 1                                                                                                        | 26453 ± 83700                                                              | 41 ± 129                                                                                                                  |
| CTF-19   | 1158 ± 78                                                                                                    | 1047180 ± 37429                                                            | 1616 ± 58                                                                                                                 |
| CTF-20   | 87 ± 2                                                                                                       | 1278732 ± 83700                                                            | 1973 ± 129                                                                                                                |
| CTF-21   | 550 ± 28                                                                                                     | 1094090 ± 83700                                                            | 1688 ± 129                                                                                                                |
| CTF-22   | 413 ± 39                                                                                                     | 1233540 ± 83700                                                            | 1903 ± 129                                                                                                                |
| CTF-23   | 5 ± 1                                                                                                        | 211 ± 83700                                                                | 0                                                                                                                         |
| CTF-24   | 0                                                                                                            | 52 ± 83700                                                                 | 0                                                                                                                         |
| CTF-25   | 548 ± 97                                                                                                     | 1180854 ± 37429                                                            | 1822 ± 58                                                                                                                 |
| CTF-26   | 67 ± 1                                                                                                       | 708920 ± 83700                                                             | 1094 ± 129                                                                                                                |
| CTF-27   | 911 ± 37                                                                                                     | 1846820 ± 83700                                                            | 2849 ± 129                                                                                                                |
| CTF-28   | 119 ± 2                                                                                                      | 523284 ± 83700                                                             | 807 ± 129                                                                                                                 |
| CTF-29   | 571 ± 37                                                                                                     | 1701600 ± 83700                                                            | 2625 ± 129                                                                                                                |
| CTF-30   | 1561 ± 150                                                                                                   | 1732470 ± 83700                                                            | 2673 ± 129                                                                                                                |
| CTF-31   | 650 ± 45                                                                                                     | 932254 ± 83700                                                             | 1438 ± 129                                                                                                                |
| CTF-32   | 1041 ± 70                                                                                                    | 2106120 ± 37429                                                            | 3249 ± 129                                                                                                                |
| CTF-33   | 260 ± 20                                                                                                     | 1174570 ± 83700                                                            | 1812 ± 129                                                                                                                |
| CTF-34   | 2373 ± 25                                                                                                    | 2102950 ± 19003                                                            | 3245 ± 31                                                                                                                 |
| CTF-35   | 600 ± 22                                                                                                     | 1623260 ± 83700                                                            | 2504 ± 129                                                                                                                |
| CTF-36   | 160 ± 13                                                                                                     | 556118 ± 83700                                                             | 858 ± 129                                                                                                                 |
| CTF-37   | 507 ± 33                                                                                                     | 824017 ± 83700                                                             | 1271 ± 129                                                                                                                |
| CTF-38   | 150 ± 15                                                                                                     | 873549 ± 83700                                                             | 1348 ± 129                                                                                                                |
| CTF-39   | 1151 ± 75                                                                                                    | 1404440 ± 37429                                                            | 2167 ± 58                                                                                                                 |
| CTF-40   | 33 ± 3                                                                                                       | 138843 ± 83700                                                             | 214 ± 129                                                                                                                 |
| CTF-41   | 0                                                                                                            | 397 ± 83700                                                                | 0                                                                                                                         |
| CTF-42   | 100 ± 2                                                                                                      | 261811 ± 83700                                                             | 404 ± 129                                                                                                                 |
| CTF-43   | 652 ± 45                                                                                                     | 1526450 ± 83700                                                            | 2355 ± 129                                                                                                                |
| CTF-44   | 44 ± 1                                                                                                       | 442557 ± 83700                                                             | 683 ± 129                                                                                                                 |
| CTF-2    | 358 ± 21                                                                                                     | 1325510 ± 83700                                                            | 2045 ± 129                                                                                                                |
| CTF-3    | 158 ± 46                                                                                                     | 1043881 ± 83700                                                            |                                                                                                                           |
| Suzuki   |                                                                                                              |                                                                            | 1611 ± 129                                                                                                                |
| Nicanite | 59 ± 3                                                                                                       | 678971 ± 83700                                                             | 1047 ± 129                                                                                                                |

<sup>1</sup>25 mg polymer, 8.3 mL water, 8.3 mL triethylamine, 8.3 mL methanol and 3 wt. % Pt on the manual setup for 5 h and the standard error is given for the determined slope in the linear region of the evolution. <sup>2</sup>5 mg sample, 1.7 mL water, 1.7 mL triethylamine, 1.7 mL water and 3 wt. % for 2 h.

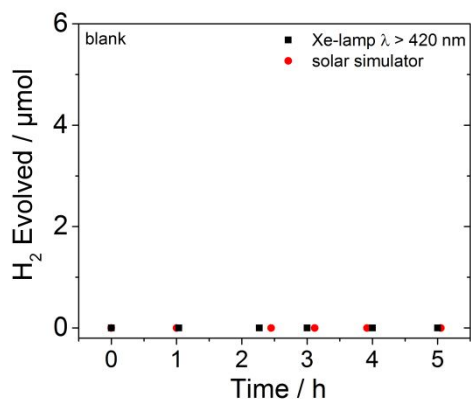

**Figure S-71:** Hydrogen evolution experiments in the absence of photocatalyst from 8.3 mL water, 8.3 mL triethylamine, 8.3 mL methanol and 3 wt. % Pt under visible light irradiation (300 W Xe light source,  $\lambda > 420$  nm, kinetic measurements) and solar light (1 Sun, high-throughput)

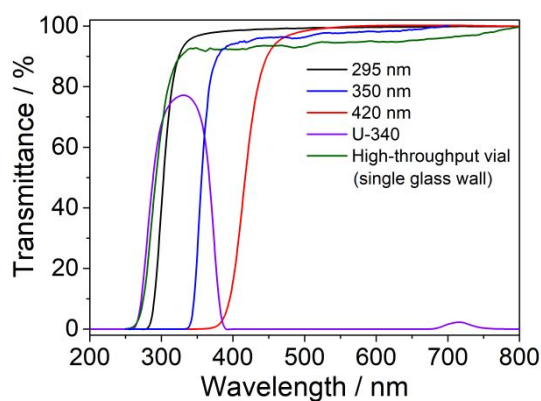

**Figure S-72:** Transmittance spectra of the filters used in kinetic measurements and the high-throughput vials.

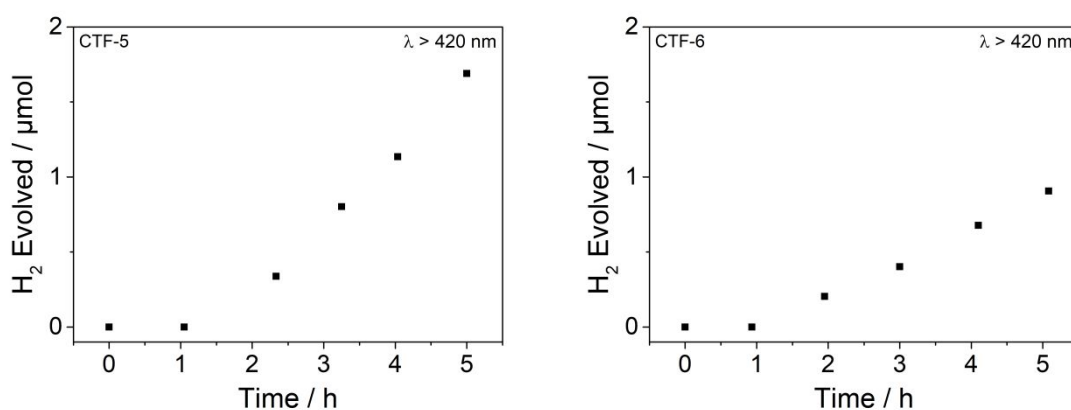

**Figure S-73:** Hydrogen evolution of CTF-5 (25 mg) and CTF-6 (25 mg) from 8.3 mL water, 8.3 mL triethylamine, 8.3 mL methanol and 3 wt. % Pt under visible light irradiation (300 W Xe light source,  $\lambda > 420$  nm).

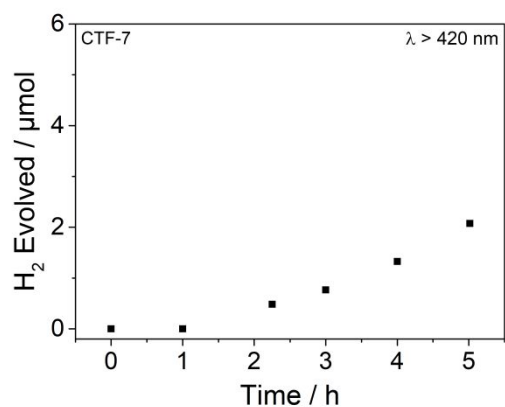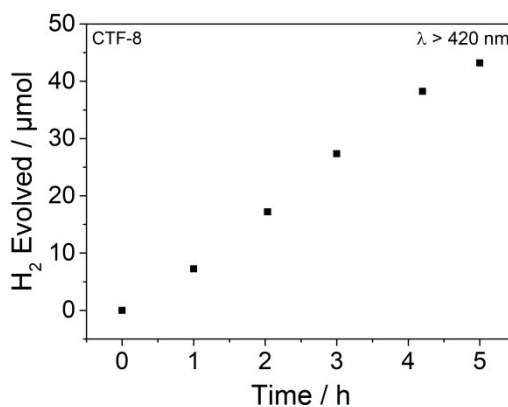

**Figure S-74:** Hydrogen evolution of CTF-7 (25 mg) and CTF-8 (25 mg) from 8.3 mL water, 8.3 mL triethylamine, 8.3 mL methanol and 3 wt. % Pt under visible light irradiation (300 W Xe light source,  $\lambda > 420$  nm).

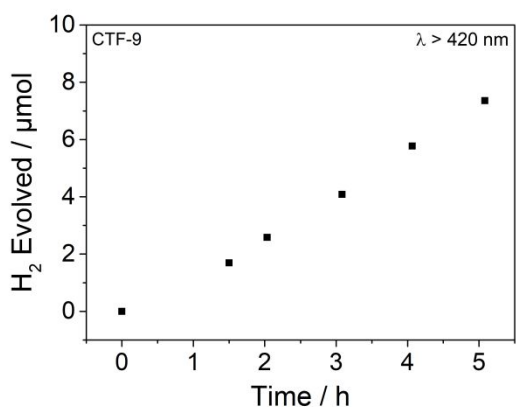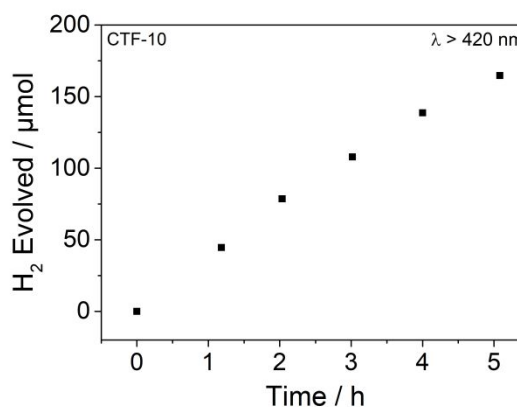

**Figure S-75:** Hydrogen evolution of CTF-9 (25 mg) and CTF-10 (25 mg) from 8.3 mL water, 8.3 mL triethylamine, 8.3 mL methanol and 3 wt. % Pt under visible light irradiation (300 W Xe light source,  $\lambda > 420$  nm).

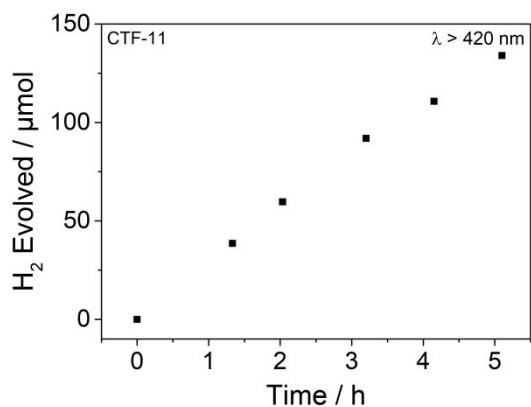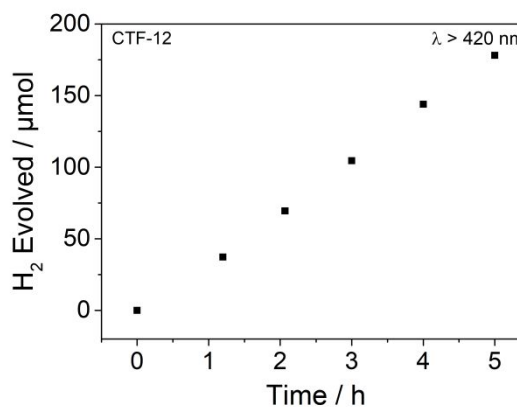

**Figure S-76:** Hydrogen evolution of CTF-11 (25 mg) and CTF-12 (25 mg) from 8.3 mL water, 8.3 mL triethylamine, 8.3 mL methanol and 3 wt. % Pt under visible light irradiation (300 W Xe light source,  $\lambda > 420$  nm).



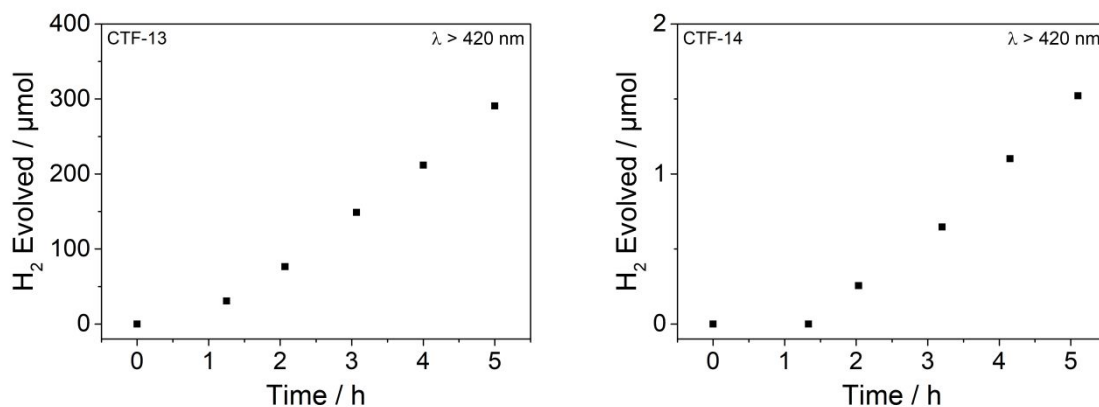

**Figure S-77:** Hydrogen evolution of CTF-13 (25 mg) and CTF-14 (25 mg) from 8.3 mL water, 8.3 mL triethylamine, 8.3 mL methanol and 3 wt. % Pt under visible light irradiation (300 W Xe light source,  $\lambda > 420$  nm).

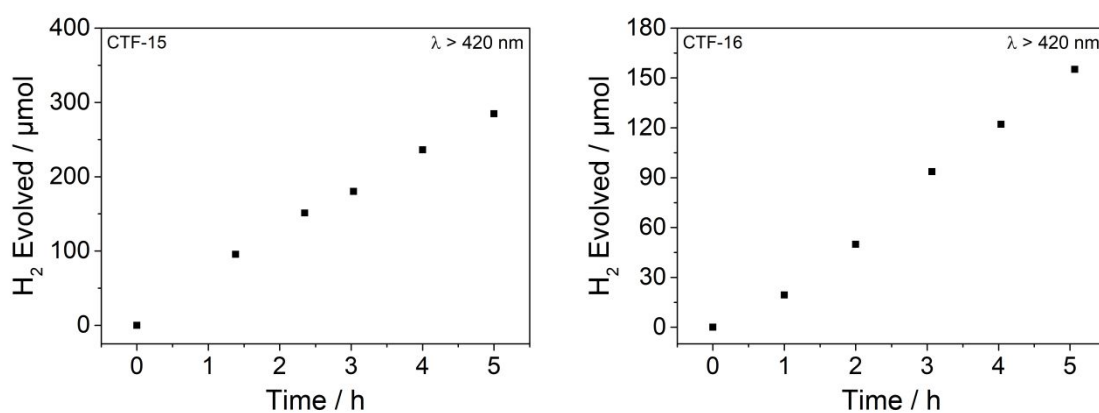

**Figure S-78:** Hydrogen evolution of CTF-15 (25 mg) and CTF-16 (25 mg) from 8.3 mL water, 8.3 mL triethylamine, 8.3 mL methanol and 3 wt. % Pt under visible light irradiation (300 W Xe light source,  $\lambda > 420$  nm).

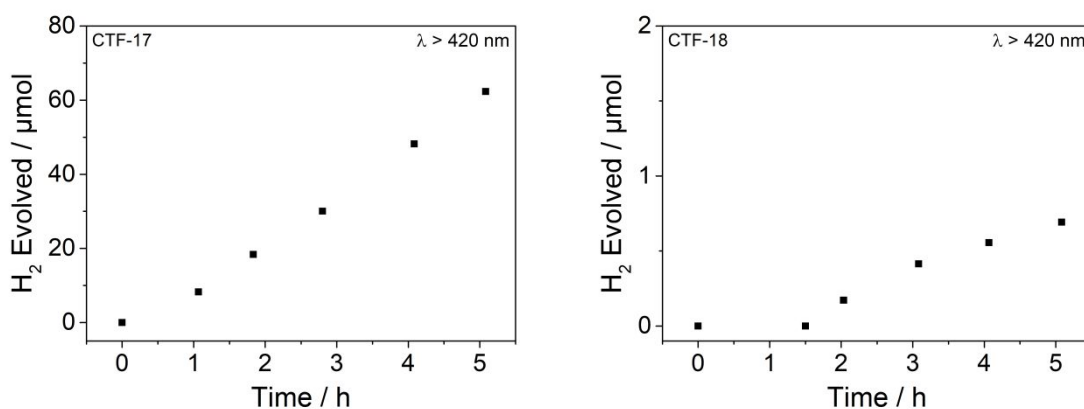

**Figure S-79:** Hydrogen evolution of CTF-17 (25 mg) and CTF-18 (25 mg) from 8.3 mL water, 8.3 mL triethylamine, 8.3 mL methanol and 3 wt. % Pt under visible light irradiation (300 W Xe light source,  $\lambda > 420$  nm).

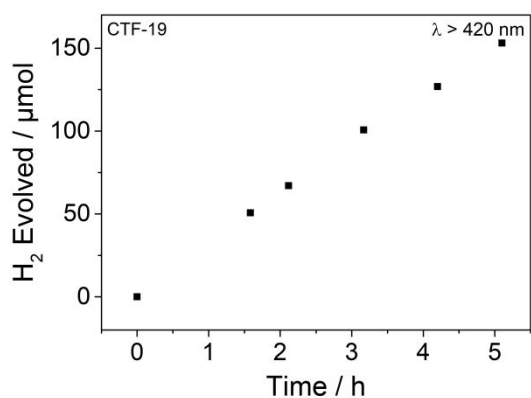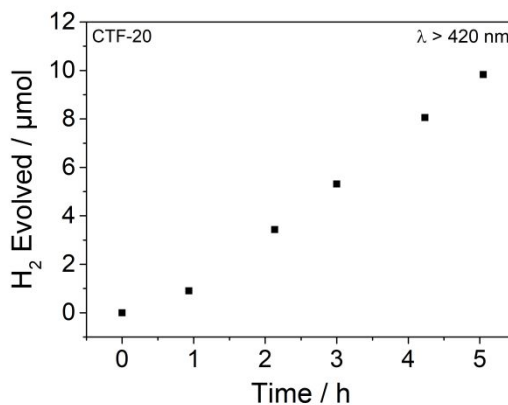

**Figure S-80:** Hydrogen evolution of CTF-19 (25 mg) and CTF-20 (25 mg) from 8.3 mL water, 8.3 mL triethylamine, 8.3 mL methanol and 3 wt. % Pt under visible light irradiation (300 W Xe light source,  $\lambda > 420$  nm).

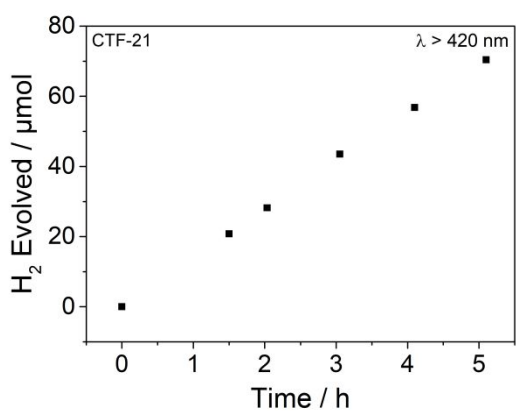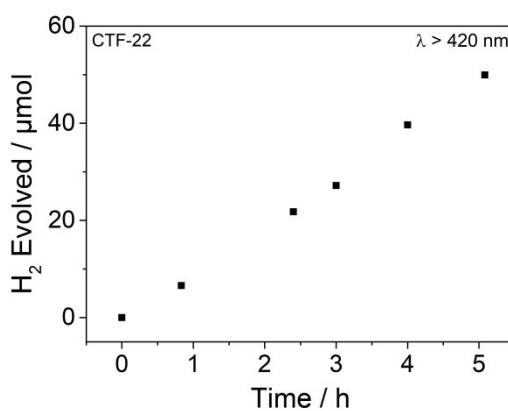

**Figure S-81:** Hydrogen evolution of CTF-21 (25 mg) and CTF-22 (25 mg) from 8.3 mL water, 8.3 mL triethylamine, 8.3 mL methanol and 3 wt. % Pt under visible light irradiation (300 W Xe light source,  $\lambda > 420$  nm).

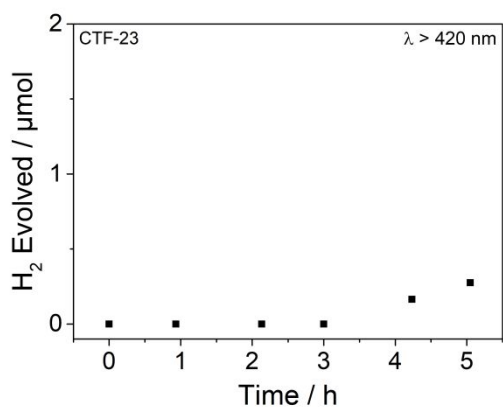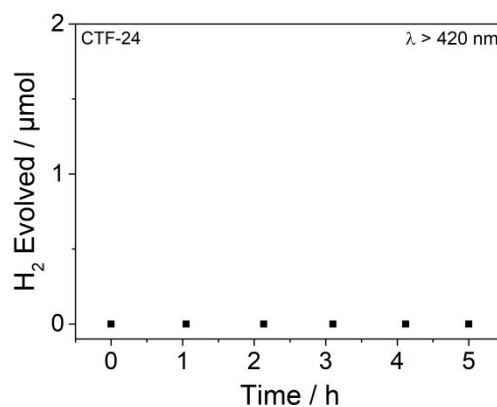

**Figure S-82:** Hydrogen evolution of CTF-23 (25 mg) and CTF-24 (25 mg) from 8.3 mL water, 8.3 mL triethylamine, 8.3 mL methanol and 3 wt. % Pt under visible light irradiation (300 W Xe light source,  $\lambda > 420$  nm).

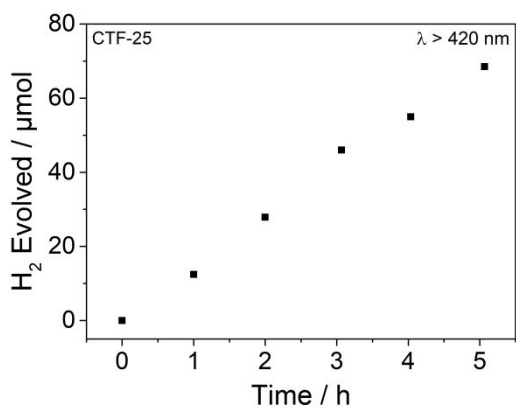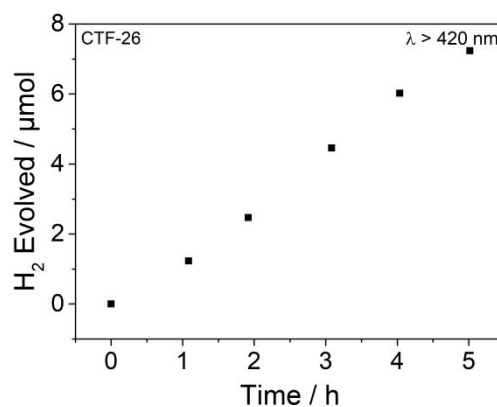

**Figure S-83:** Hydrogen evolution of CTF-25 (25 mg) and CTF-26 (25 mg) from 8.3 mL water, 8.3 mL triethylamine, 8.3 mL methanol and 3 wt. % Pt under visible light irradiation (300 W Xe light source,  $\lambda > 420$  nm).

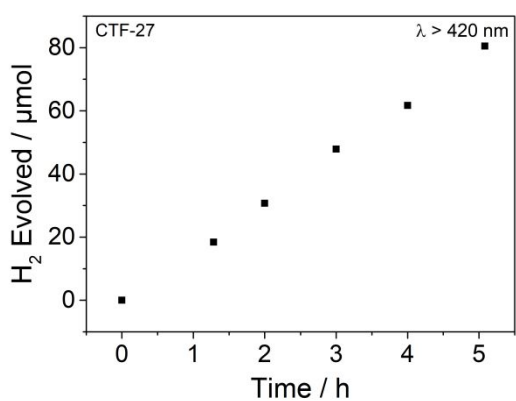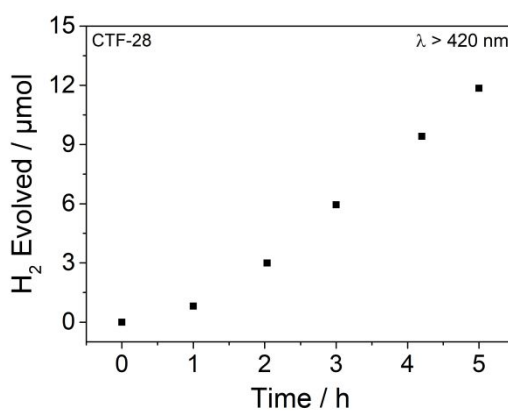

**Figure S-84:** Hydrogen evolution of CTF-27 (25 mg) and CTF-28 (25 mg) from 8.3 mL water, 8.3 mL triethylamine, 8.3 mL methanol and 3 wt. % Pt under visible light irradiation (300 W Xe light source,  $\lambda > 420$  nm).

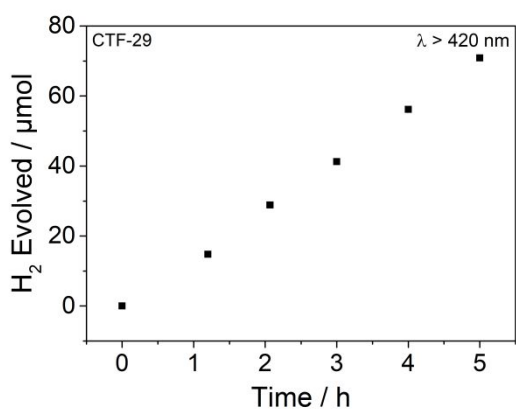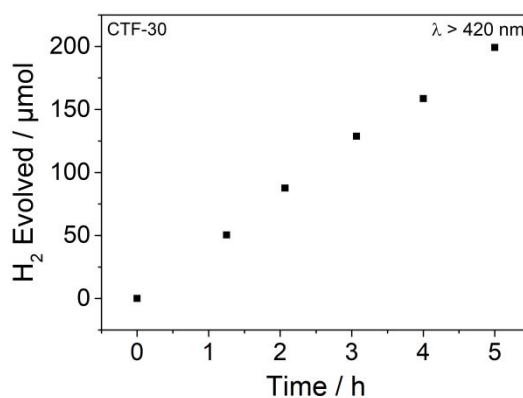

**Figure S-85:** Hydrogen evolution of CTF-29 (25 mg) and CTF-30 (25 mg) from 8.3 mL water, 8.3 mL triethylamine, 8.3 mL methanol and 3 wt. % Pt under visible light irradiation (300 W Xe light source,  $\lambda > 420$  nm).

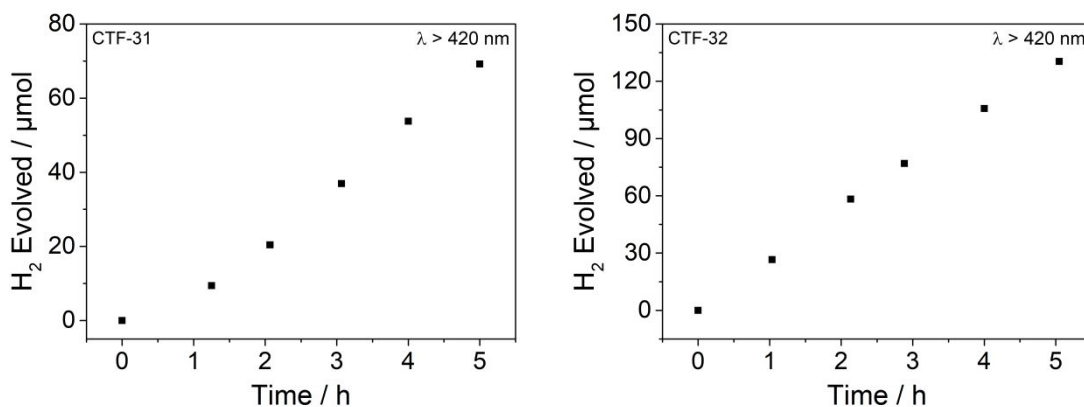

**Figure S-86:** Hydrogen evolution of CTF-31 (25 mg) and CTF-32 (25 mg) from 8.3 mL water, 8.3 mL triethylamine, 8.3 mL methanol and 3 wt. % Pt under visible light irradiation (300 W Xe light source,  $\lambda > 420$  nm).

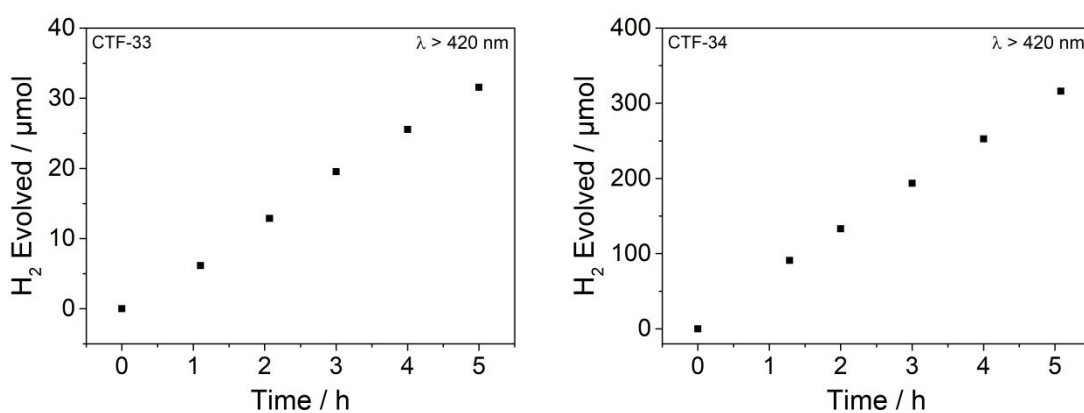

**Figure S-87:** Hydrogen evolution of CTF-33 (25 mg) and CTF-34 (25 mg) from 8.3 mL water, 8.3 mL triethylamine, 8.3 mL methanol and 3 wt. % Pt under visible light irradiation (300 W Xe light source,  $\lambda > 420$  nm).

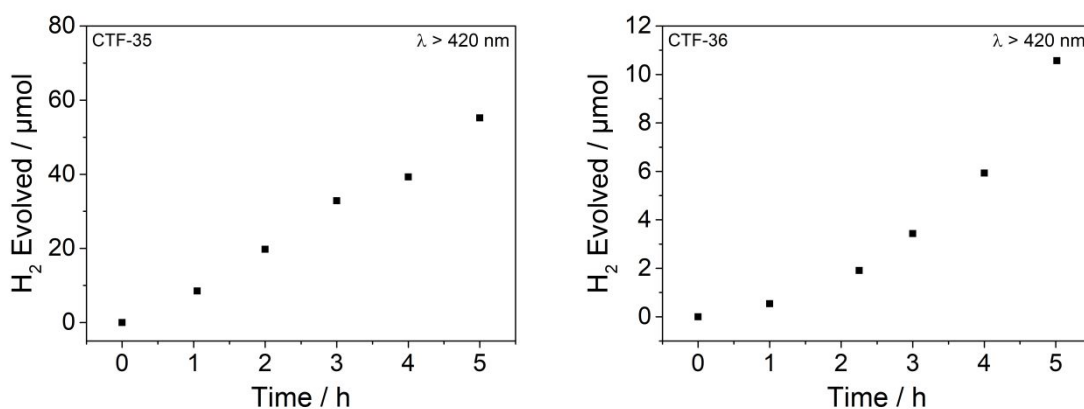

**Figure S-88:** Hydrogen evolution of CTF-35 (25 mg) and CTF-36 (25 mg) from 8.3 mL water, 8.3 mL triethylamine, 8.3 mL methanol and 3 wt. % Pt under visible light irradiation (300 W Xe light source,  $\lambda > 420$  nm).

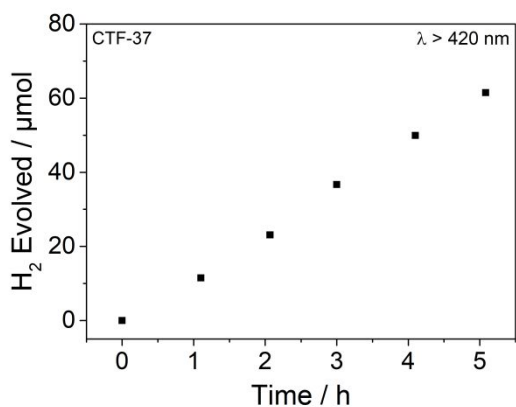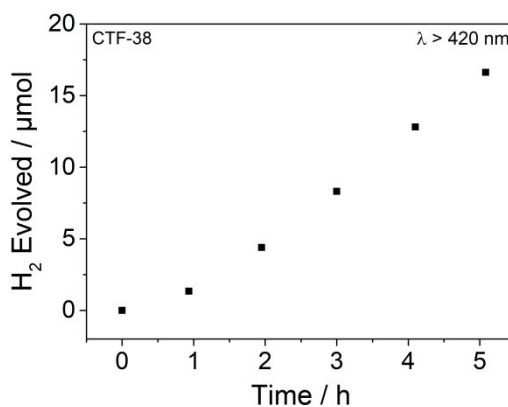

**Figure S-89:** Hydrogen evolution of CTF-37 (25 mg) and CTF-38 (25 mg) from 8.3 mL water, 8.3 mL triethylamine, 8.3 mL methanol and 3 wt. % Pt under visible light irradiation (300 W Xe light source,  $\lambda > 420$  nm).

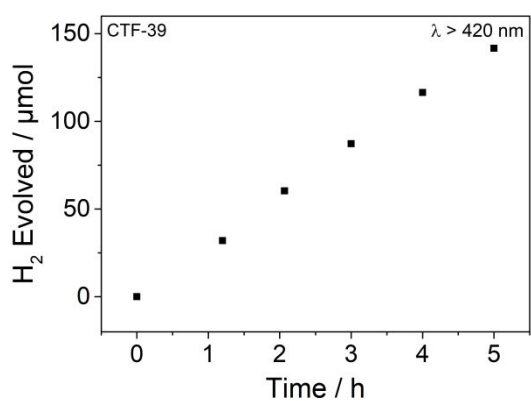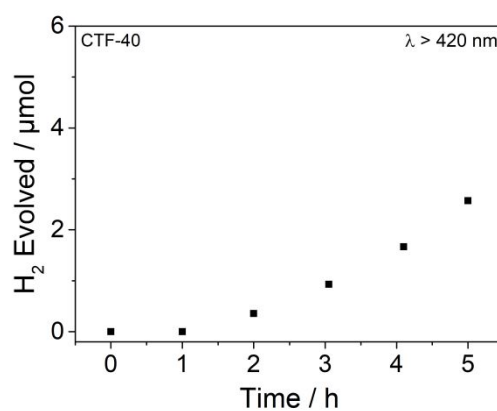

**Figure S-90:** Hydrogen evolution of CTF-39 (25 mg) and CTF-40 (25 mg) from 8.3 mL water, 8.3 mL triethylamine, 8.3 mL methanol and 3 wt. % Pt under visible light irradiation (300 W Xe light source,  $\lambda > 420$  nm).

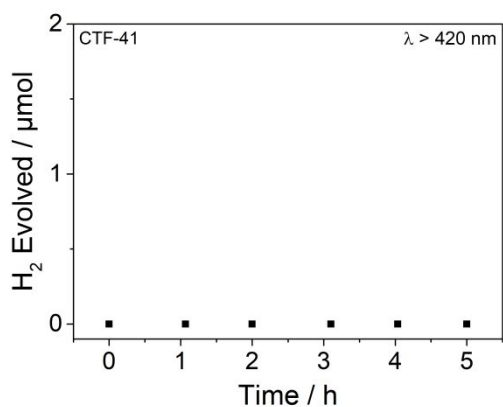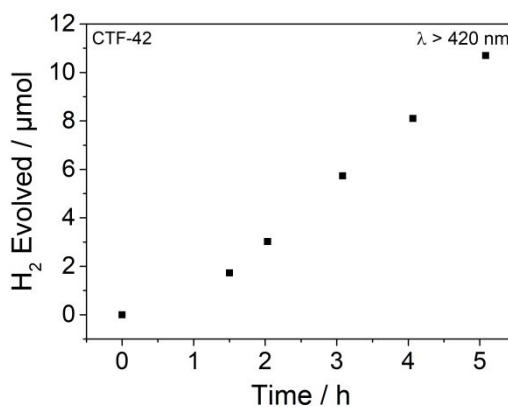

**Figure S-91:** Hydrogen evolution of CTF-41 (25 mg) and CTF-42 (25 mg) from 8.3 mL water, 8.3 mL triethylamine, 8.3 mL methanol and 3 wt. % Pt under visible light irradiation (300 W Xe light source,  $\lambda > 420$  nm).

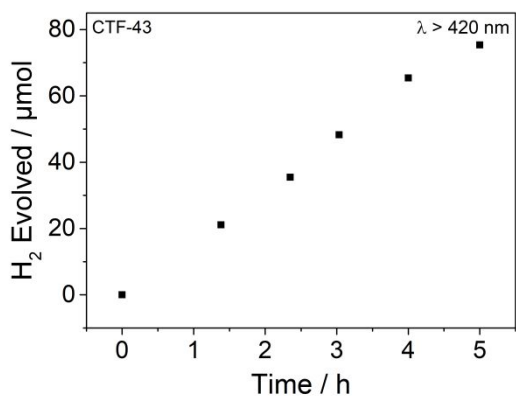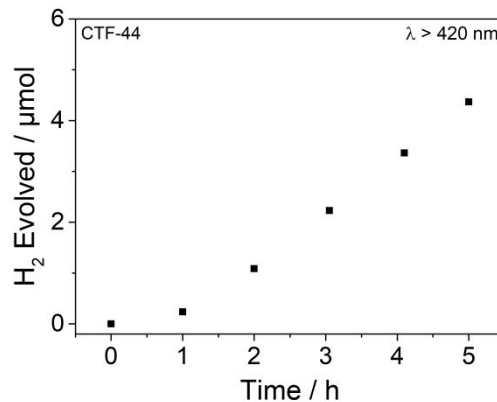

**Figure S-92:** Hydrogen evolution of CTF-43 (25 mg) and CTF-44 (25 mg) from 8.3 mL water, 8.3 mL triethylamine, 8.3 mL methanol and 3 wt. % Pt under visible light irradiation (300 W Xe light source,  $\lambda > 420$  nm).

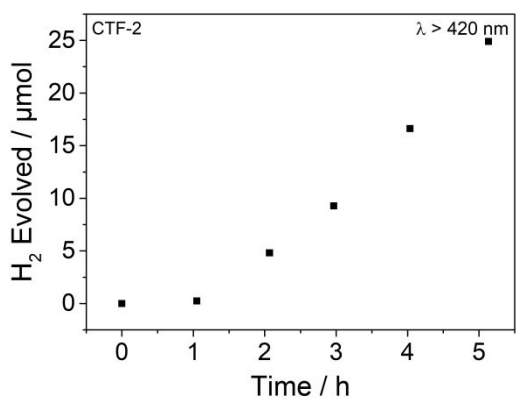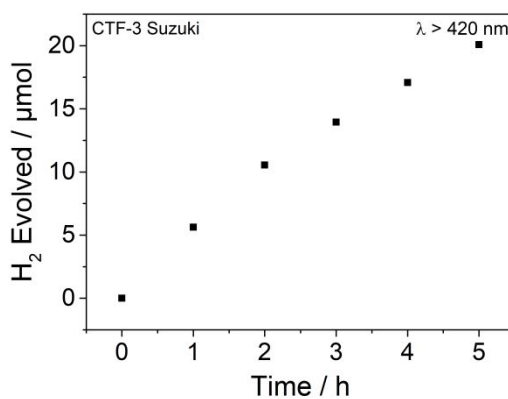

**Figure S-93:** Hydrogen evolution of CTF-2 (25 mg) and CTF-3 Suzuki (25 mg) from 8.3 mL water, 8.3 mL triethylamine, 8.3 mL methanol and 3 wt. % Pt under visible light irradiation (300 W Xe light source,  $\lambda > 420$  nm).

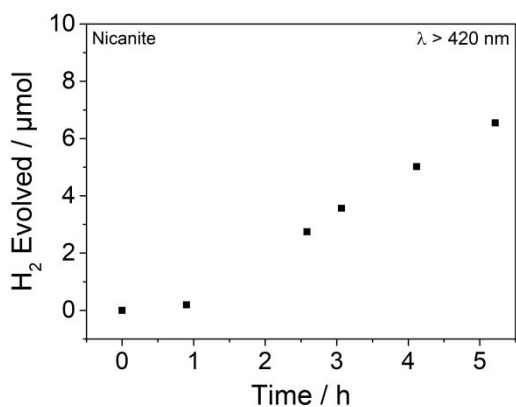

**Figure S-94:** Hydrogen evolution of commercial carbon nitride (25 mg) from 8.3 mL water, 8.3 mL triethylamine, 8.3 mL methanol and 3 wt. % Pt under visible light irradiation (300 W Xe light source,  $\lambda > 420$  nm).

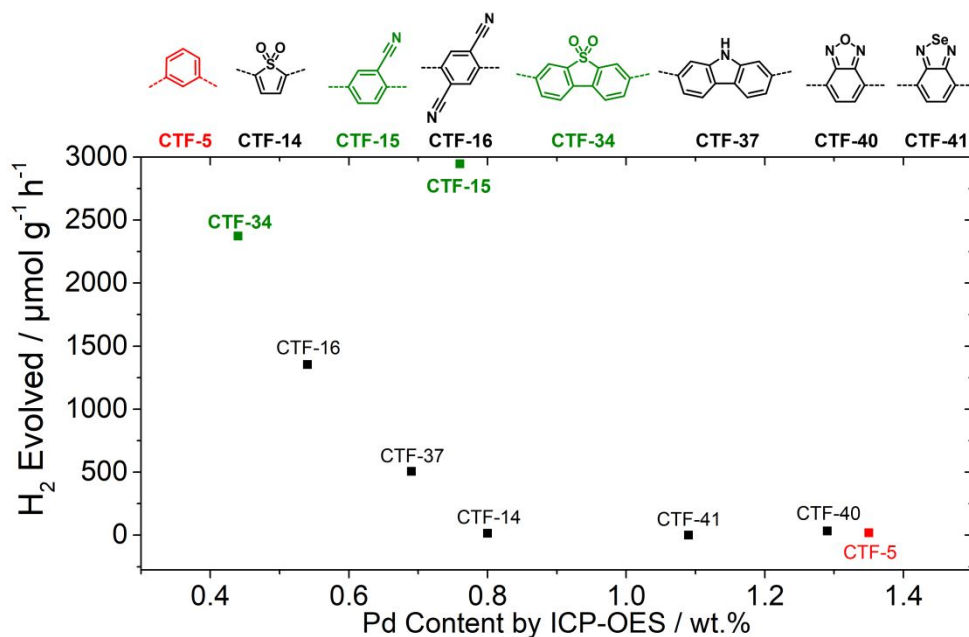

**Figure S-95:** Diagram of Pd content in the polymer, as determined by ICP-OES, against the hydrogen evolution rate under visible light (300 W Xe light source,  $\lambda > 420$  nm, 25 mg catalyst, water/TEA/MeOH 1:1:1).

**Table S-8:** Table of Pd content in the polymers, as determined by ICP-OES.

| Sample | Pd content by ICP-OES / wt. % |
|--------|-------------------------------|
| CTF-5  | 1.35                          |
| CTF-14 | 0.80                          |
| CTF-15 | 0.76                          |
| CTF-16 | 0.54                          |
| CTF-34 | 0.44                          |
| CTF-37 | 0.69                          |
| CTF-40 | 1.29                          |
| CTF-41 | 1.09                          |

*Conditions:* 20 mg of samples were microwave digested using aqua regia. The resulting solutions were run on the ICP-OES instrument calibrated with yttrium internal standard and palladium calibration standards at 340 nm.

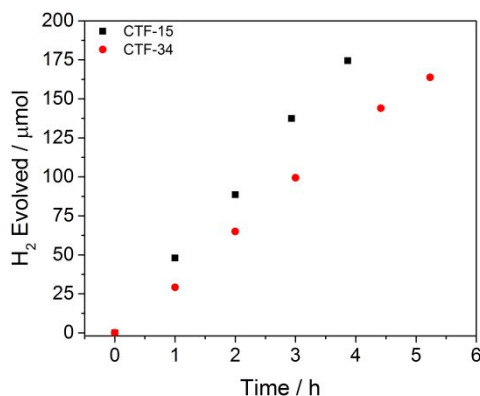

**Figure S-96:** Hydrogen evolution of as synthesized CTF-15 and CTF-34 (25 mg) from a 1:1:1 mixture of water/triethylamine/methanol under visible light irradiation (300 W Xe light source,  $\lambda > 420$  nm) without additional co-catalysts.

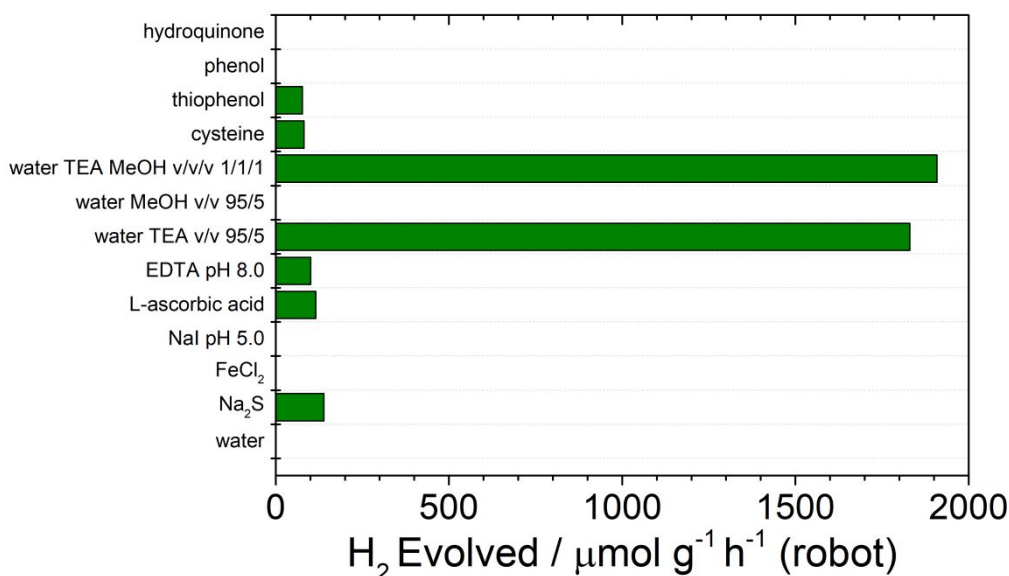

**Figure S-97:** Scavenger screening for CTF-15 under solar simulator irradiation (2 hours) on the high-throughput setup. Na<sub>2</sub>S, FeCl<sub>2</sub>, NaI pH 5.0, ascorbic acid, EDTA pH 8.0, cysteine, thiophenol, phenol, and hydroquinone were used with a concentration of 0.2 M.

**Table S-9:** Conversion of the scavenger screening for CTF-15.

| Scavenger                  | Peak area HT / a.u. | Hydrogen evolution / μmol g <sup>-1</sup> h <sup>-1</sup> |
|----------------------------|---------------------|-----------------------------------------------------------|
| No scavenger (pure water)  | 7                   | 0                                                         |
| Na <sub>2</sub> S          | 180131              | 139                                                       |
| FeCl <sub>2</sub>          | 808                 | 1                                                         |
| NaI pH 5.0                 | 68                  | 0                                                         |
| L-Ascorbic acid            | 215089              | 165                                                       |
| EDTA sodium salt pH 8.0    | 130726              | 100                                                       |
| Water/TEA v/v 95/5         | 2371991             | 1830                                                      |
| Water/MeOH v/v 95/5        | 496                 | 1                                                         |
| Water/TEA/MeOH v/v/v 1/1/1 | 2475132             | 1910                                                      |
| Cystein                    | 105912              | 82                                                        |
| Thiophenol                 | 100049              | 77                                                        |
| Phenol                     | 27                  | 0                                                         |
| Hydroquinone               | 437                 | 0                                                         |

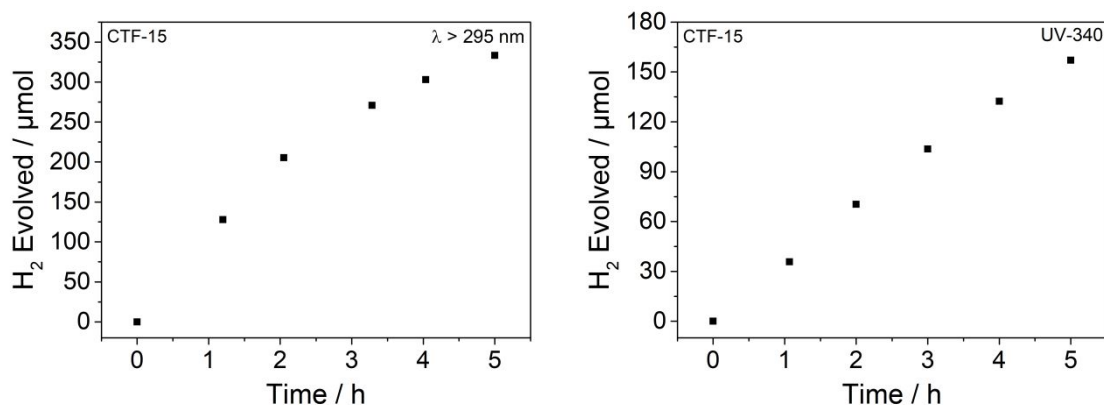

**Figure S-98:** Hydrogen evolution of CTF-15 (25 mg) from 8.3 mL water, 8.3 mL triethylamine, 8.3 mL methanol and 3 wt. % Pt under UV-visible light irradiation ( $\lambda > 295$  nm, left) and UV-light (UV-340, right).



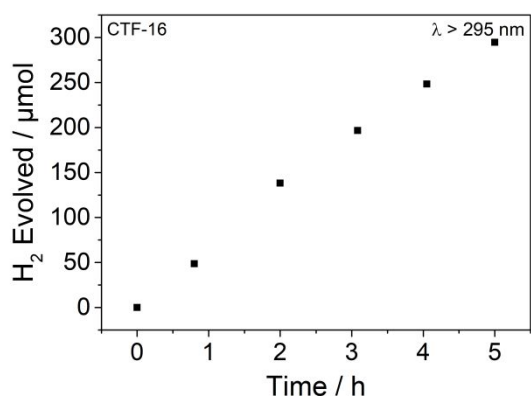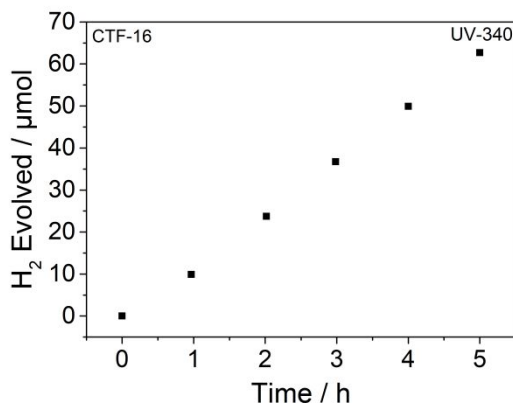

**Figure S-99:** Hydrogen evolution of CTF-16 (25 mg) from 8.3 mL water, 8.3 mL triethylamine, 8.3 mL methanol and 3 wt. % Pt under broad-band irradiation (300 W Xe light source,  $\lambda > 295$  nm, left) and UV-light (300 W Xe light source, UV-340 filter, right).

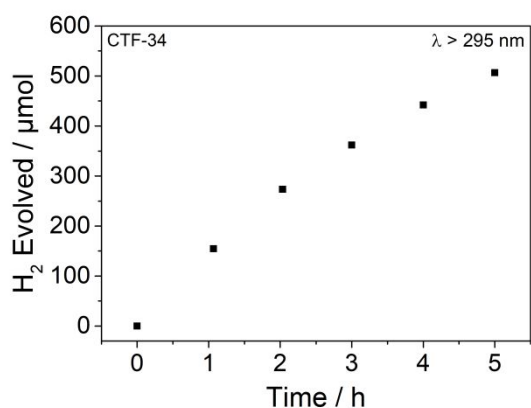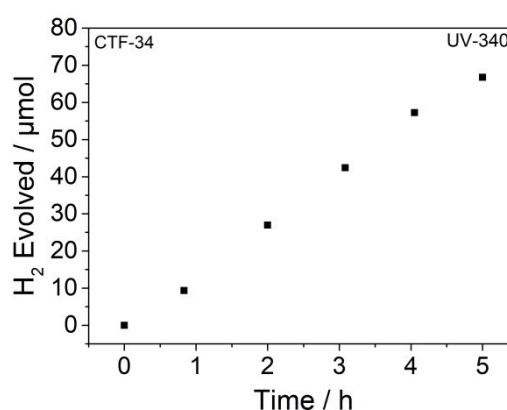

**Figure S-100:** Hydrogen evolution of CTF-34 (25 mg) from 8.3 mL water, 8.3 mL triethylamine, 8.3 mL methanol and 3 wt. % Pt under broad-band irradiation (300 W Xe light source,  $\lambda > 295$  nm, left) and UV-light (300 W Xe light source, UV-340 filter, right).

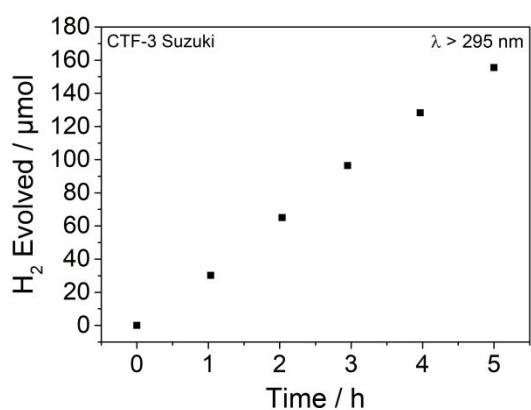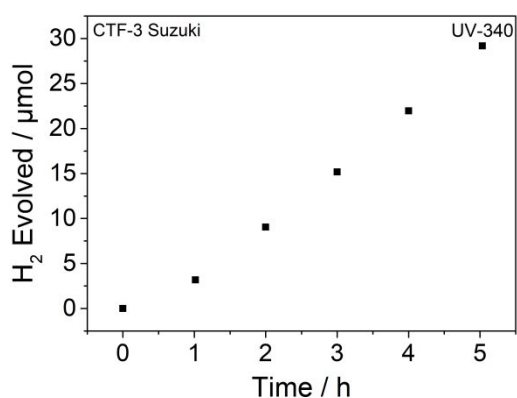

**Figure S-101:** Hydrogen evolution of CTF-3 Suzuki (25 mg) from 8.3 mL water, 8.3 mL triethylamine, 8.3 mL methanol and 3 wt. % Pt under broad-band irradiation (300 W Xe light source,  $\lambda > 295$  nm, left) and UV-light (300 W Xe light source, UV-340 filter, right).

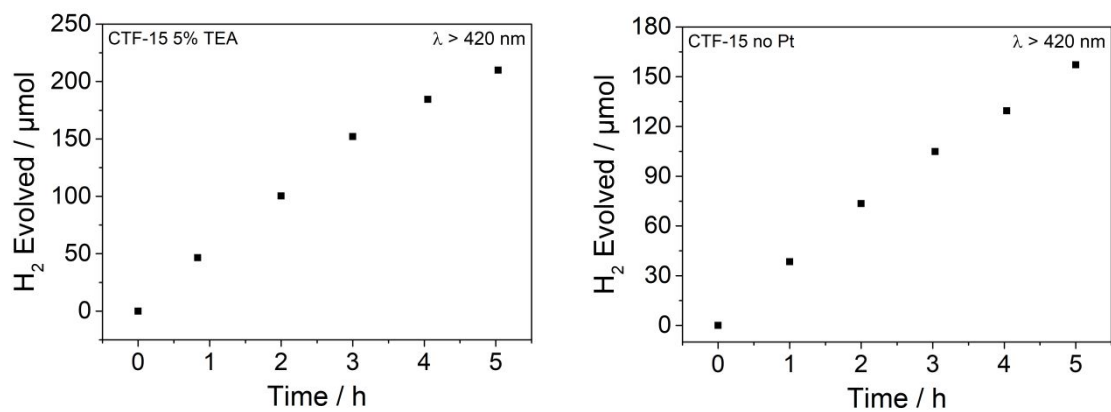

**Figure S-102:** Hydrogen evolution of CTF-15 (25 mg) from 25 mL water with 5 vol. % TEA under visible light irradiation (300 W Xe light source,  $\lambda > 420$  nm, left) and CTF-15 (25 mg) from 8.3 mL water, 8.3 mL triethylamine, 8.3 mL methanol without platinum co-catalyst (300 W Xe light source,  $\lambda > 420$  nm, right).

**Table S-10:** Overview of hydrogen evolution rates for further filters and scavengers with 3 wt% platinum co-catalyst.

| Sample                  | H <sub>2</sub> Evolved /<br>μmol g <sup>-1</sup> h <sup>-1</sup> | Light source and cut-off filter<br>used         | Scavenger            |
|-------------------------|------------------------------------------------------------------|-------------------------------------------------|----------------------|
| <b>CTF-15</b>           | 2622 ± 1268 <sup>a</sup> /<br>4026 ± 244 <sup>b</sup>            | Xe LS 300 W λ > 295 nm                          | Water/TEA/MeOH       |
| <b>CTF-15</b>           | 1274 ± 178                                                       | Xe LS 300 W UV-340                              | Water/TEA/MeOH       |
| <b>CTF-16</b>           | 2383 ± 381                                                       | Xe LS 300 W λ > 295 nm                          | Water/TEA/MeOH       |
| <b>CTF-16</b>           | 509 ± 39                                                         | Xe LS 300 W UV-340                              | Water/TEA/MeOH       |
| <b>CTF-34</b>           | 4013 ± 1288 <sup>a</sup><br>/ 5384 ± 363 <sup>b</sup>            | Xe LS 300 W λ > 295 nm                          | Water/TEA/MeOH       |
| <b>CTF-34</b>           | 552 ± 61                                                         | Xe LS 300 W UV-340                              | Water/TEA/MeOH       |
| <b>CTF-3<br/>Suzuki</b> | 1270 ± 10                                                        | Xe LS 300 W λ > 295 nm                          | Water/TEA/MeOH       |
| <b>CTF-3<br/>Suzuki</b> | 254 ± 54                                                         | Xe LS 300 W UV-340                              | Water/TEA/MeOH       |
|                         |                                                                  |                                                 |                      |
| <b>CTF-15</b>           | 1690 ± 467                                                       | Xe LS 300 W λ > 420 nm                          | Water/5 vol% TEA     |
| <b>CTF-15 no<br/>Pt</b> | 1242 ± 208                                                       | Xe LS 300 W λ > 420 nm                          | Water/TEA/MeOH       |
| <b>CTF-15</b>           | 55 ± 5 <sup>c</sup>                                              | Xe LS 300 W λ > 420 nm                          | Ascorbic acid 0.2 M  |
| <b>CTF-15</b>           | 100 ± 13                                                         | Xe LS 300 W λ > 350 nm                          | Ascorbic acid 0.2 M  |
| <b>CTF-15</b>           | 277 ± 28                                                         | Xe LS 300 W λ > 295 nm                          | Ascorbic acid 0.2 M  |
| <b>CTF-15</b>           | 50 ± 11                                                          | Solar simulator (ABA, LED system,<br>no filter) | Ascorbic acid 0.2 M  |
| <b>CTF-15</b>           | 122 ± 26                                                         | Xe LS 300 W λ > 420 nm                          | Sodium sulfide 0.2 M |
| <b>CTF-15</b>           | 170 ± 12                                                         | Xe LS 300 W λ > 420 nm                          | Sodium sulfide 0.2 M |
| <b>CTF-15</b>           | 224 ± 8                                                          | Xe LS 300 W λ > 295 nm                          | Sodium sulfide 0.2 M |
| <b>CTF-15</b>           | 172 ± 13 <sup>d</sup>                                            | Solar simulator (ABA, LED system,<br>no filter) | Sodium sulfide 0.2 M |

<sup>a</sup> Regression fit including standard deviation over 0-5 hours; <sup>b</sup> Regression fit including standard deviation over 0-2 hours; <sup>c</sup> Regression fit including standard deviation over 3-5 hours; <sup>d</sup> uncorrected result, control experiment of sodium sulfide had an evolution rate of 6 ± 1 μmol g<sup>-1</sup> h<sup>-1</sup> under broad-band illumination in absence a photocatalyst.

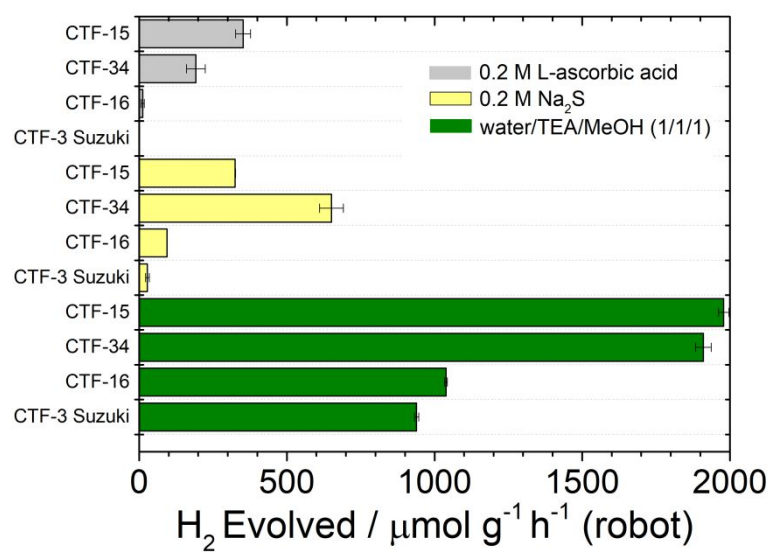

**Figure S-103:** Scavenger screening for hydrogen evolution: comparison of four polymers under solar irradiation (1 Sun) on the high-throughput setup.

**Table S-11:** Conversion of the scavenger screening for the polymers CTF-15, CTF-16, CTF-34, and CTF-3 Suzuki.

| Scavenger                      | Peak area HT / a. u. | Hydrogen evolution rate <sup>a</sup> / $\mu\text{mol g}^{-1} \text{h}^{-1}$ |
|--------------------------------|----------------------|-----------------------------------------------------------------------------|
| CTF-3 Suzuki TEA water MeOH    | 1217313.5            | 939                                                                         |
| CTF-16 TEA water MeOH          | 1347174.5            | 1039                                                                        |
| CTF-34 TEA water MeOH          | 2475548.5            | 1910                                                                        |
| CTF-15 TEA water MeOH          | 2564781              | 1979                                                                        |
| CTF-3 Suzuki Na <sub>2</sub> S | 35942                | 28                                                                          |
| CTF-16 Na <sub>2</sub> S       | 123007               | 94                                                                          |
| CTF-34 Na <sub>2</sub> S       | 844368.5             | 651                                                                         |
| CTF-15 Na <sub>2</sub> S       | 421608               | 325                                                                         |
| CTF-3 Suzuki ascorbic acid     | 21.5                 | 0                                                                           |
| CTF-16 ascorbic acid           | 15485.5              | 12                                                                          |
| CTF-34 ascorbic acid           | 248990.5             | 192                                                                         |
| CTF-15 ascorbic acid           | 456555               | 352                                                                         |

[a] Calibration using standard gas mixtures with a known concentration of H<sub>2</sub>.

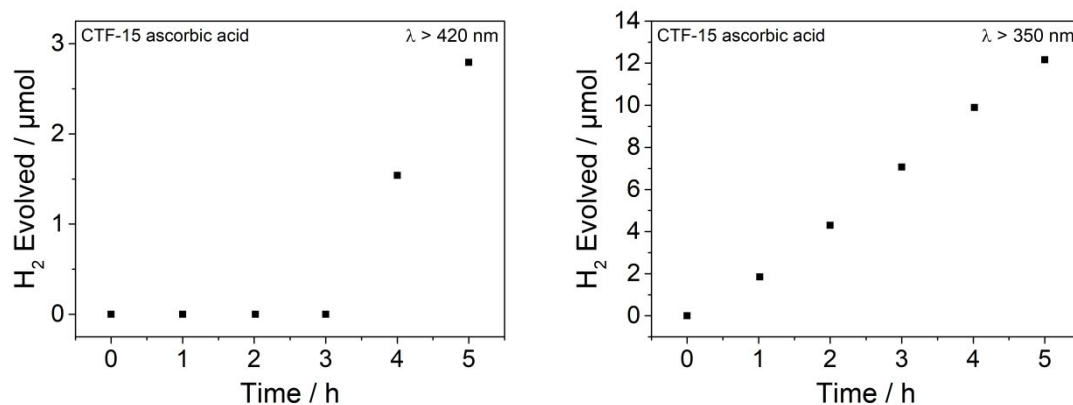

**Figure S-104:** Hydrogen evolution of CTF-15 (25 mg) from 25 mL 0.2 M ascorbic acid solution under visible light irradiation (300 W Xe light source,  $\lambda > 420 \text{ nm}$ , left) and UV-visible light (300 W Xe light source,  $\lambda > 350 \text{ nm}$ , right).

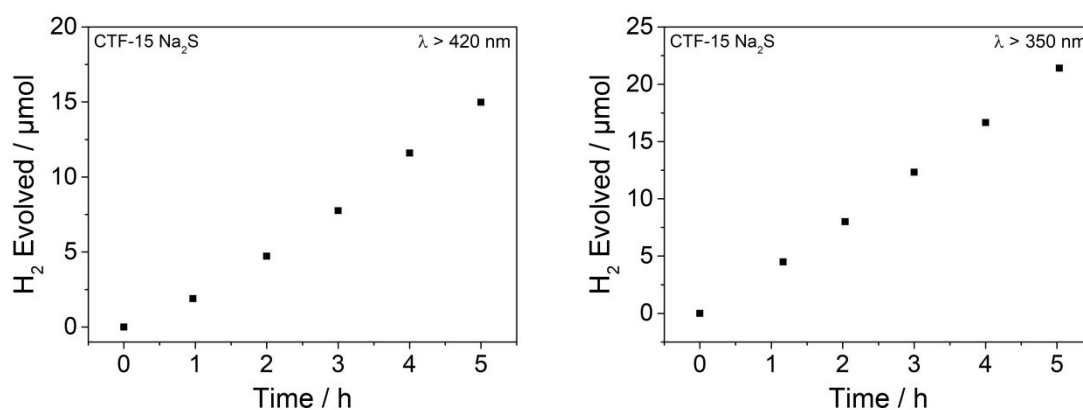

**Figure S-105:** Hydrogen evolution of CTF-15 (25 mg) from 25 mL 0.2 M sodium sulphide solution under visible light irradiation (300 W Xe light source,  $\lambda > 420 \text{ nm}$ , left) and UV-visible light (300 W Xe light source,  $\lambda > 350 \text{ nm}$ , right).

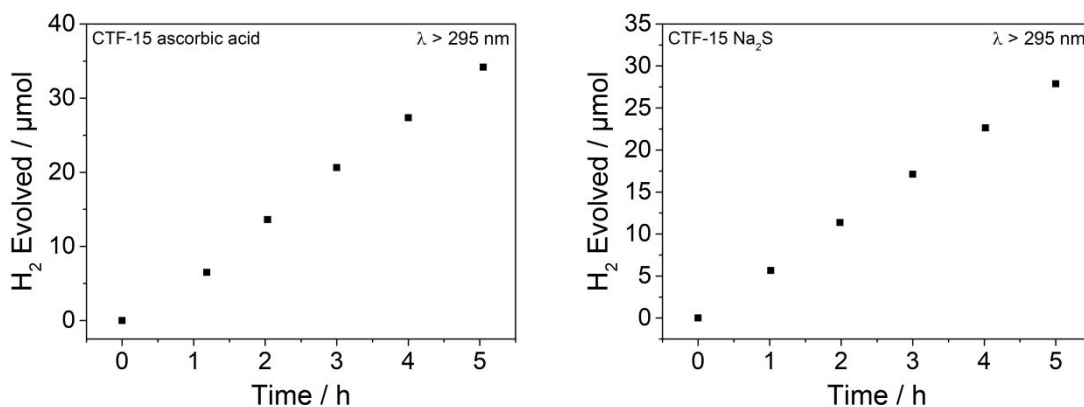

**Figure S-106:** Hydrogen evolution of CTF-15 (25 mg) from 25 mL 0.2 M L-ascorbic acid solution under UV-visible irradiation (300 W Xe light source,  $\lambda > 295$  nm, left) CTF-15 (25 mg) from 25 mL 0.2 M sodium sulfide solution under UV-visible irradiation (300 W Xe light source,  $\lambda > 295$  nm, right).

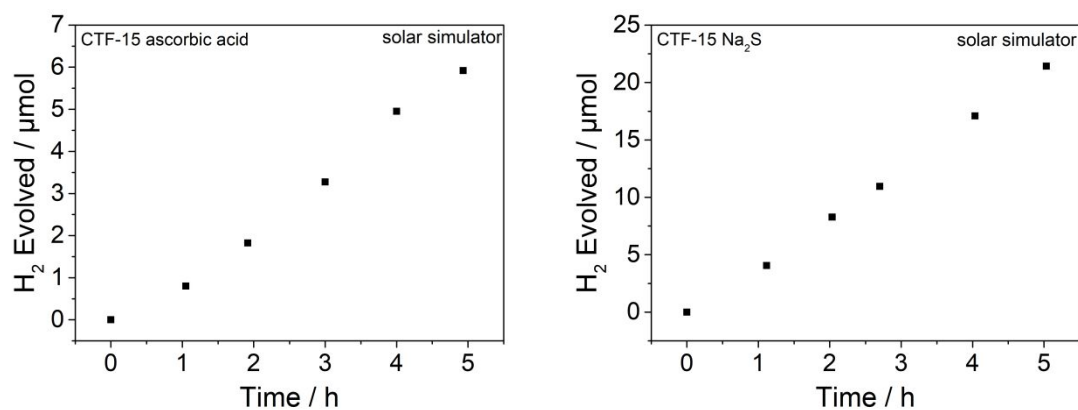

**Figure S-107:** Hydrogen evolution of CTF-15 (25 mg) from 25 mL 0.2 M ascorbic acid solution under solar light irradiation (1 Sun, left) CTF-15 (25 mg) from 25 mL 0.2 M sodium sulfide solution under solar light irradiation (1 Sun, right).

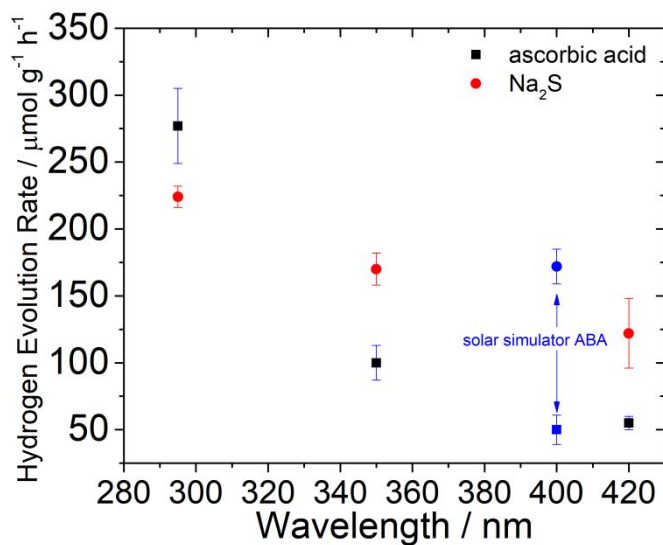

**Figure S-108:** Kinetic hydrogen evolution of CTF-15 (25 mg) from 25 mL scavenger solution and 3 wt. % Pt under  $\lambda > 295$  nm,  $\lambda > 350$  nm,  $\lambda > 420$  nm (300 W Xe light source) and solar light irradiation (1 Sun, ABA).

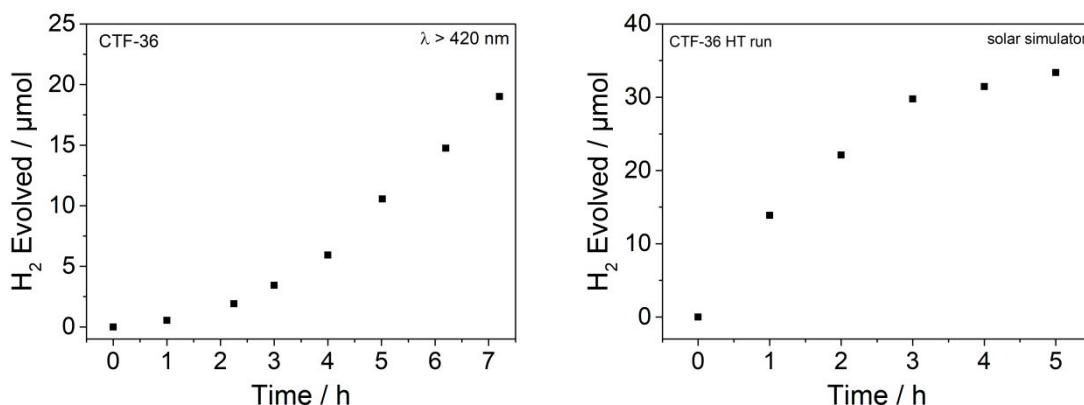

**Figure S-109:** Comparison of hydrogen evolution rates for CTF-36 on the manual setup and the HT setup. The measurements were carried out in water/TEA/MeOH with 3 wt. % platinum. For the kinetic measurement, 25 mg CTF-36 was used, and for the HT run, 5 mg of CTF-36 was used. The data shown in the HT run has been normalized to a quantity of 25 mg for comparison.

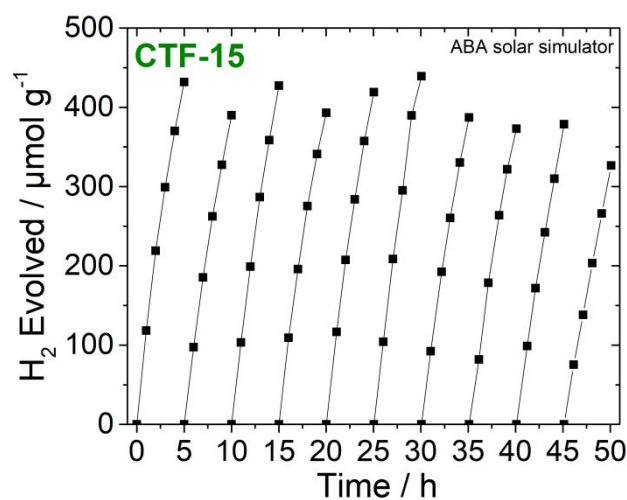

**Figure S-110:** Hydrogen evolution of CTF-15 (2,5-linked benzonitrile) tested in a long run under sacrificial conditions water/TEA/MeOH and 3 wt. % platinum co-catalyst under solar simulated light. The sample was reused from a previous, 50 hours run under  $\lambda > 420$  nm irradiation (300 W Xe light source).

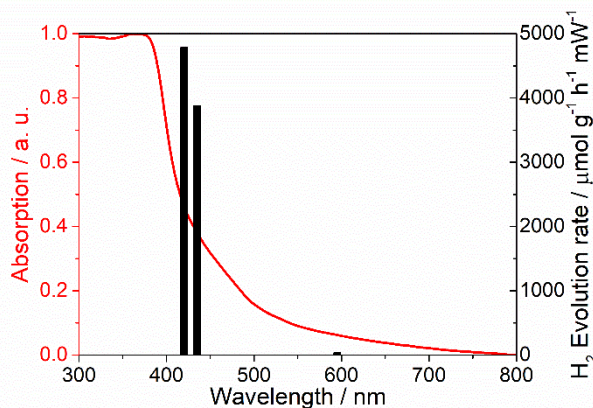

**Figure S-111:** UV-Vis absorption spectrum of CTF-15 (2,5-linked benzonitrile) and wavelength dependent hydrogen evolution experiments (8 mg photocatalyst, area illuminated = 7.8 cm<sup>2</sup>) in water/TEA/MeOH with 3 wt. % platinum as co-catalyst using monochromated LEDs (420 nm, 435 nm, and 595 nm).

The photostability of CTF-15 (2,5-linked benzonitrile CTF) was tested over 50 hours under visible light illumination ( $\lambda > 420$  nm, Xe light source) and showed no change of activity. The results rule out the photocatalyst as the source of hydrogen as more than 450  $\mu\text{mol}$  hydrogen are evolved within in 6 hours, which is more than the amount of hydrogen present in the photocatalyst. The material was then test for further 50 hours on a solar simulator (Figure S-113), recovered and characterized. No changes in the UV-vis, photoluminescence, Raman and FT-IR spectra are observed after this extended run of a total of 100 hours. The nitrile band at  $2226\text{ cm}^{-1}$  can still be identified in the FT-IR spectrum, which indicates that the material is very stable, although we cannot fully rule out partial hydrolysis of the nitrile groups.<sup>3</sup> The BET surface area of the material was slightly decreased from  $SA_{\text{BET}} = 383\text{ m}^2\text{ g}^{-1}$  to  $289\text{ m}^2\text{ g}^{-1}$  after photocatalysis. This could be due to platinum particles blocking the pores, which are photodeposited onto the material during photocatalysis.

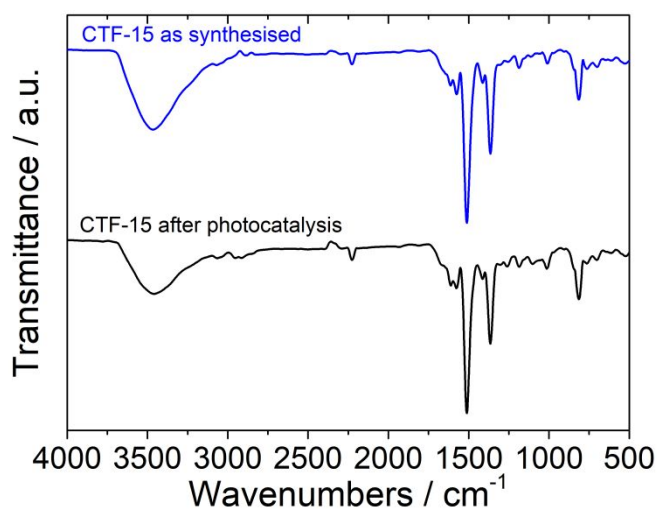

**Figure S-112:** FT-IR spectra for CTF-15 as synthesized and after photocatalysis for 100 hours.

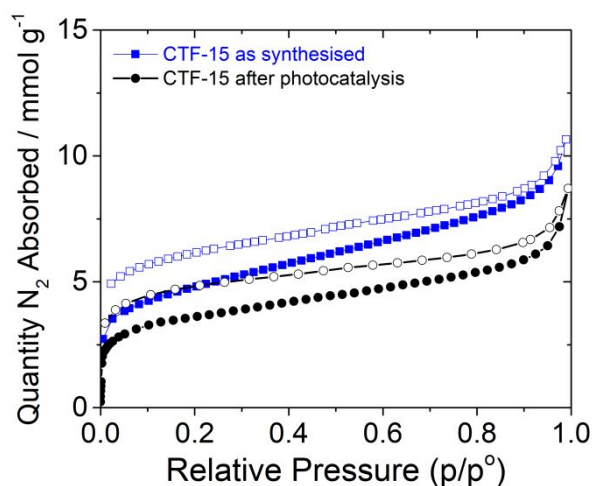

**Figure S-113:** Nitrogen sorption isotherms for CTF-15 as synthesized and after photocatalysis for 100 hours measured at 77.3 K and up to 1 bar (desorption curves shown as open symbols).



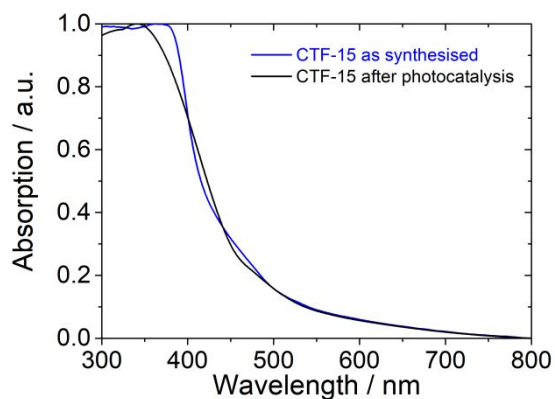

**Figure S-114:** Solid-state UV-Vis for CTF-15 as synthesized and after photocatalysis for 100 hours.

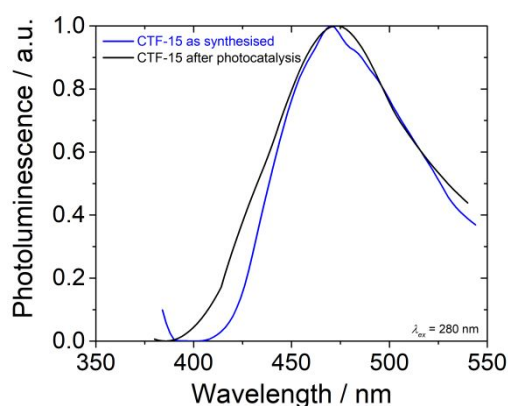

**Figure S-115:** Solid-state photoluminescence spectra ( $\lambda_{excitation} = 280$  nm) of CTF-15 as synthesized and after photocatalysis for 100 hours.

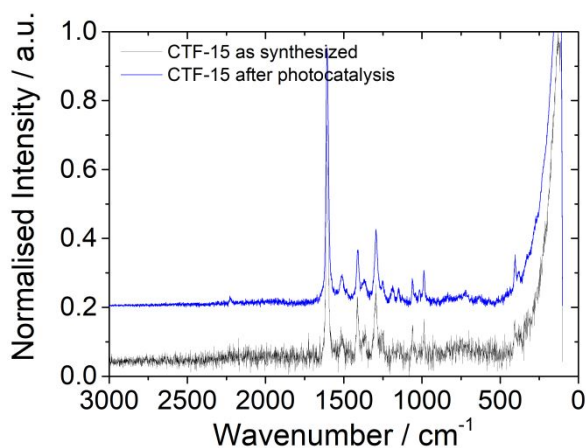

**Figure S-116:** Raman spectra for CTF-15 as synthesized and after photocatalysis for 100 hour measured on a CaF substrate (785 nm, 10% laser power, 100x objective). For clarity, the blue spectrum is shifted by +0.2 along the y-axis.

## 6. Comparison of measurements to hydrogen evolution rates on the manual setup

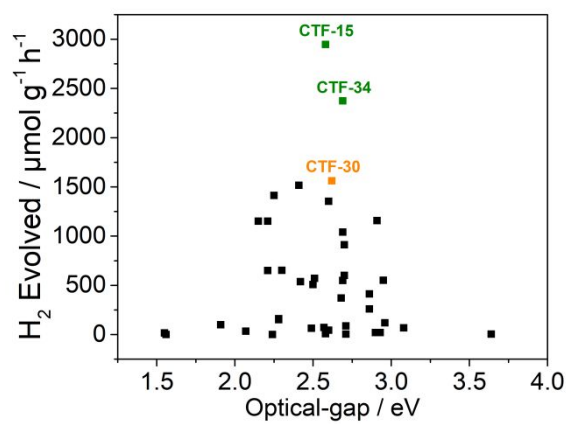

**Figure S-117:** Comparison of the optical-gap to the hydrogen evolution rates of CTFs form water/TEA/MeOH with 3 wt. % Pt.

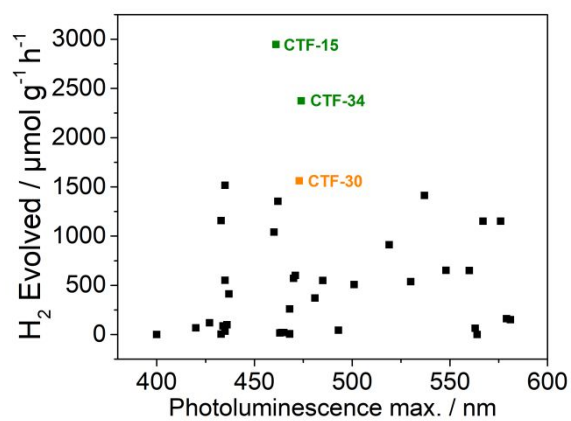

**Figure S-118:** Comparison of the photoluminescence to the hydrogen evolution rates of CTFs form water/TEA/MeOH with 3 wt. % Pt.

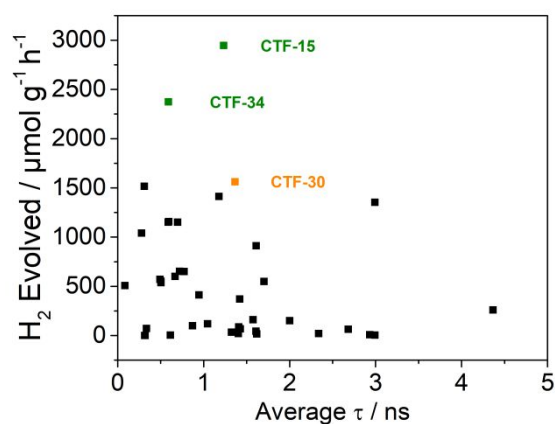

**Figure S-119:** Comparison of the fluorescence life-time spectroscopy (average weighted) to the hydrogen evolution rates of CTFs form water/TEA/MeOH with 3 wt. % Pt. In all cases the life-time of excited state is short with fitted average life-times ranging from 0.084 for CTF-37 (2,7-linked 9*H*-carbazole) to 4.366 ns for CTF-33 (2,6-linked pyridine).

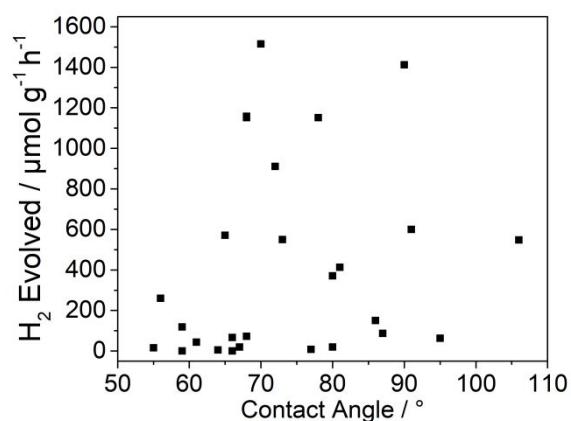

**Figure S-120:** Comparison of the contact angle to the hydrogen evolution rates of CTFs form water/TEA/MeOH with 3 wt. % Pt. In case of swelling, no contact angle was assigned (12 CTFs, including the three best performing hydrogen evolution catalysts CTF-15, CTF-32, and CTF-30).

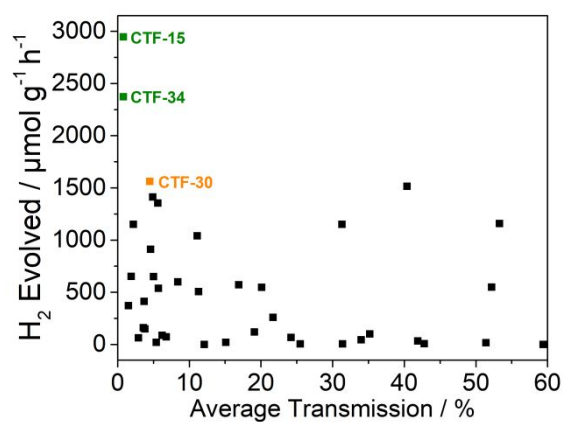

**Figure S-121:** Comparison of the light obscuration from water/TEA/MeOH to the hydrogen evolution rates of CTFs form water/TEA/MeOH with 3 wt. % Pt.

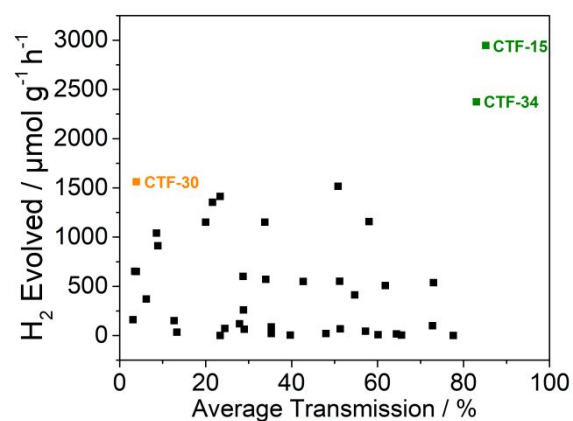

**Figure S-122:** Comparison of the light obscuration from water to the hydrogen evolution rates of CTFs form water/TEA/MeOH with 3 wt. % Pt.

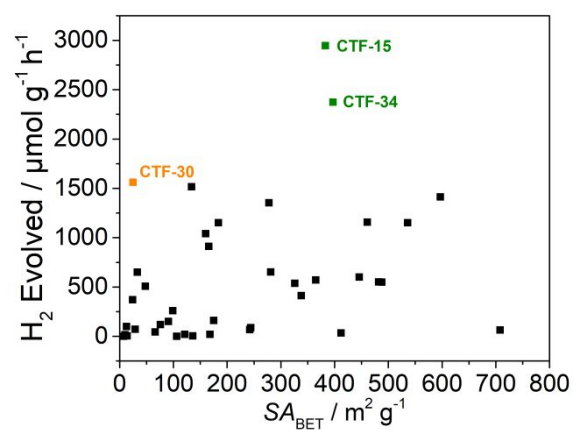

**Figure S-123:** Comparison of the surface area (SA<sub>BET</sub>, N<sub>2</sub>) to the hydrogen evolution rates of CTFs form water/TEA/MeOH with 3 wt. % Pt.

## 8. Calculations

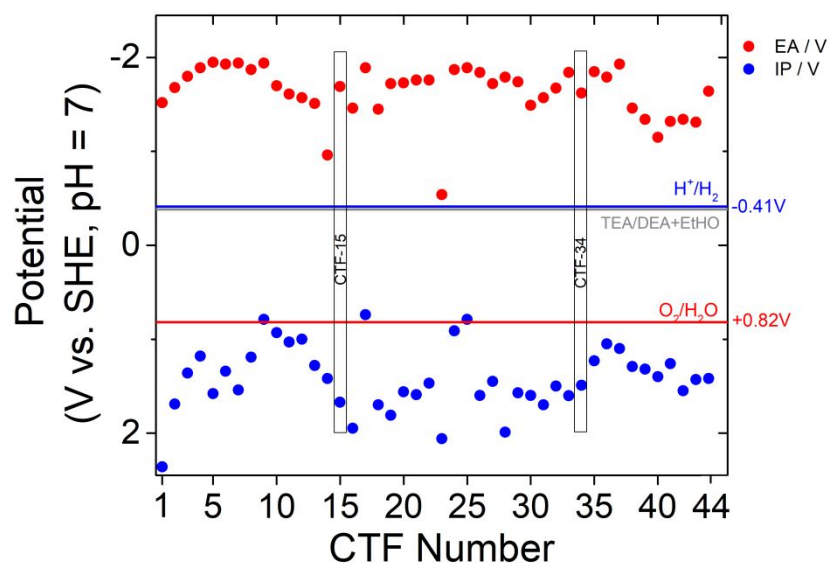

**Figure S-124:** Predicted values of EA and IP standard reduction potential for 40 CTFs investigated in this paper (CTF-5 to CTF-44 and comparison to CTF-1 to CTF-4 from the previous work<sup>1</sup>. All potentials are calculated for pH = 7 and a relative dielectric permittivity of 80.1 (water). The calculated standard reduction potentials of proton reduction (blue line), water oxidation (red line) and triethylamine oxidation (grey line) are showed for clarity.

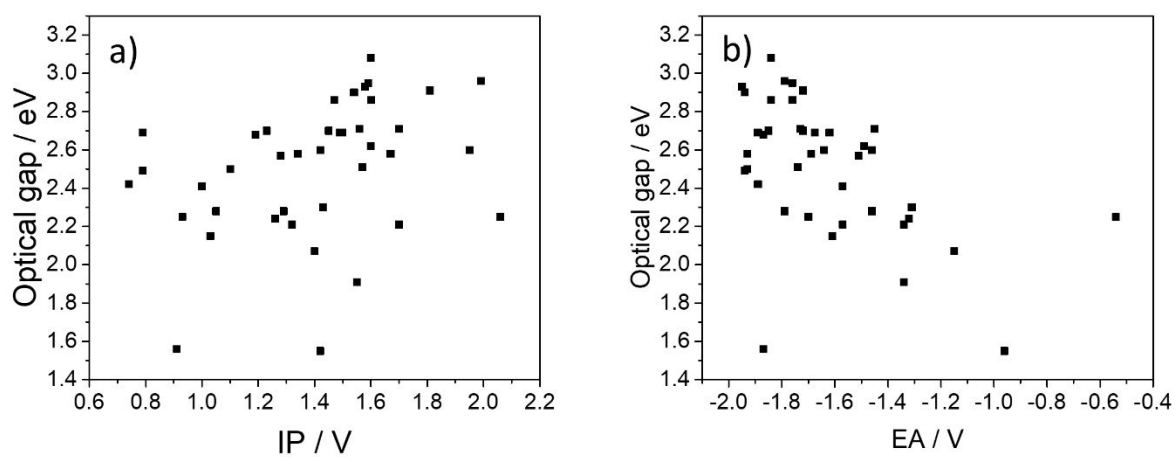

**Figure S-125:** Predicted values of IP a) and EA b) standard reduction potential compared to the optical gap of the CTFs.

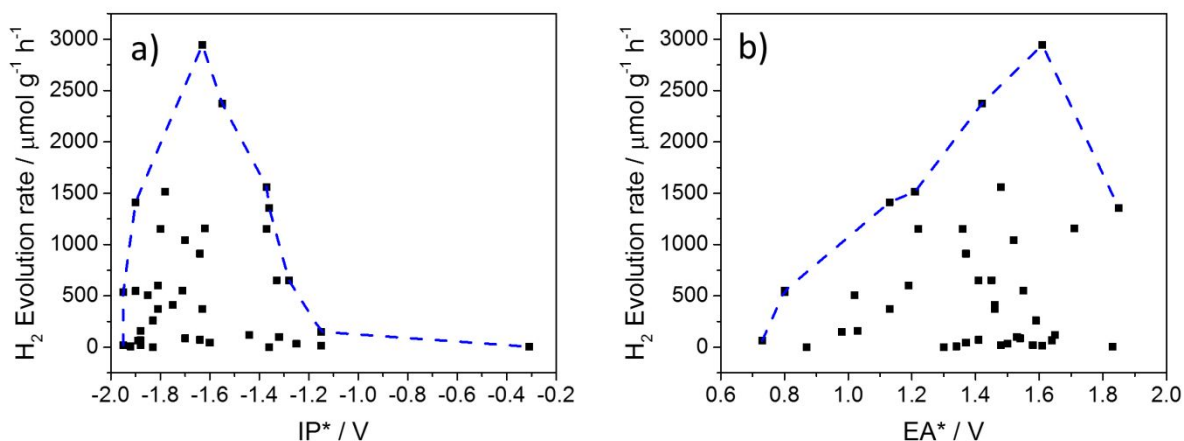

**Figure S-126:** Predicted values of IP\* a) and EA\* b) standard reduction potential compared to the hydrogen evolution rates of the CTFs. Conditions: 25 mg photocatalyst in water/TEA/MeOH and 3 wt. % platinum co-catalyst under visible light ( $\lambda > 420$  nm, 300 W Xe light source).

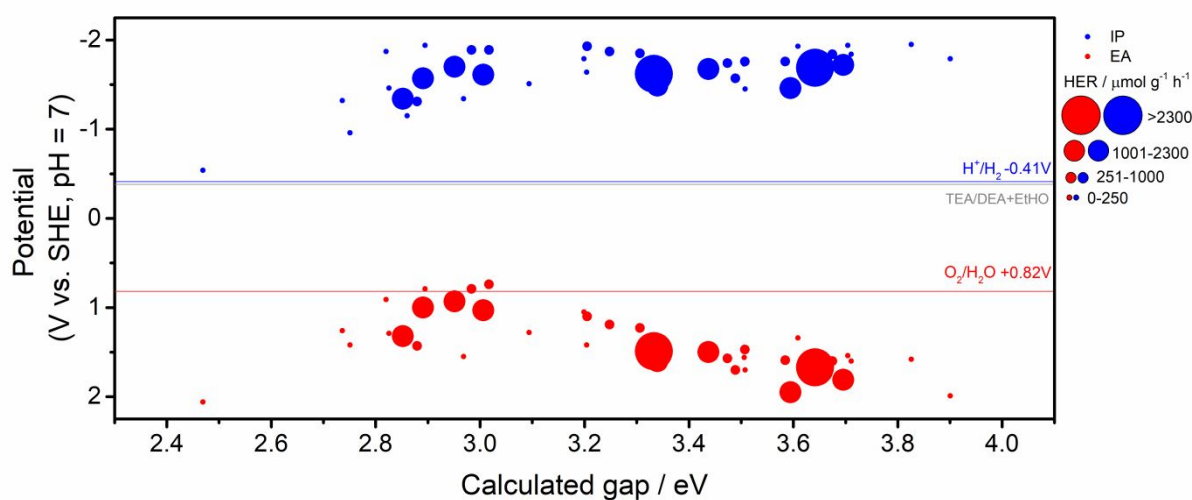

**Figure S-127:** Plot of the predicted values of the ionization potential (IP, blue) and electron affinity (EA, red) of the CTFs as a function of their predicted optical gap, where the circle size is proportional to the photocatalytic performance of the material. All hydrogen evolution rates were determined as linear fits of hydrogen produced over 5 hours for 25 mg photocatalyst in water/TEA/MeOH and 3 wt. % platinum co-catalyst under visible light ( $\lambda > 420$  nm, 300 W Xe light source).

## 9. References

- (1) Meier, C. B.; Sprick, R. S.; Monti, A.; Guiglion, P.; Lee, J.-S. M.; Zwiengenb, M. A.; Cooper, A. I. Structure-Property Relationships for Covalent Triazine-Based Frameworks: The Effect of Spacer Length on Photocatalytic Hydrogen Evolution from Water. *Polymer* **2017**, *126*, 283–290.

- (2) Liu, J.; Zou, J.; Yang, W.; Wu, H.; Li, C.; Zhang, B.; Peng, J.; Cao, Y. Highly Efficient and Spectrally Stable Blue-Light-Emitting Polyfluorenes Containing a Dibenzothiophene-S,S-Dioxide Unit. *Chem. Mater.* **2008**, *20*, 4499–4506.
- (3) Krieble, V. K.; Noll, C. I. The Hydrolysis of Nitriles with Acids. *J. Am. Chem. Soc.* **1939**, *61*, 560–563.
